# Supplementary material
Source: PubMed Central journal article supplement (PMC8317130)
Supplement: NIHMS1722043-supplement-Spectra.pdf [file NIHMS1722043-supplement-Spectra.pdf]

Acetazolamide

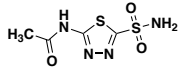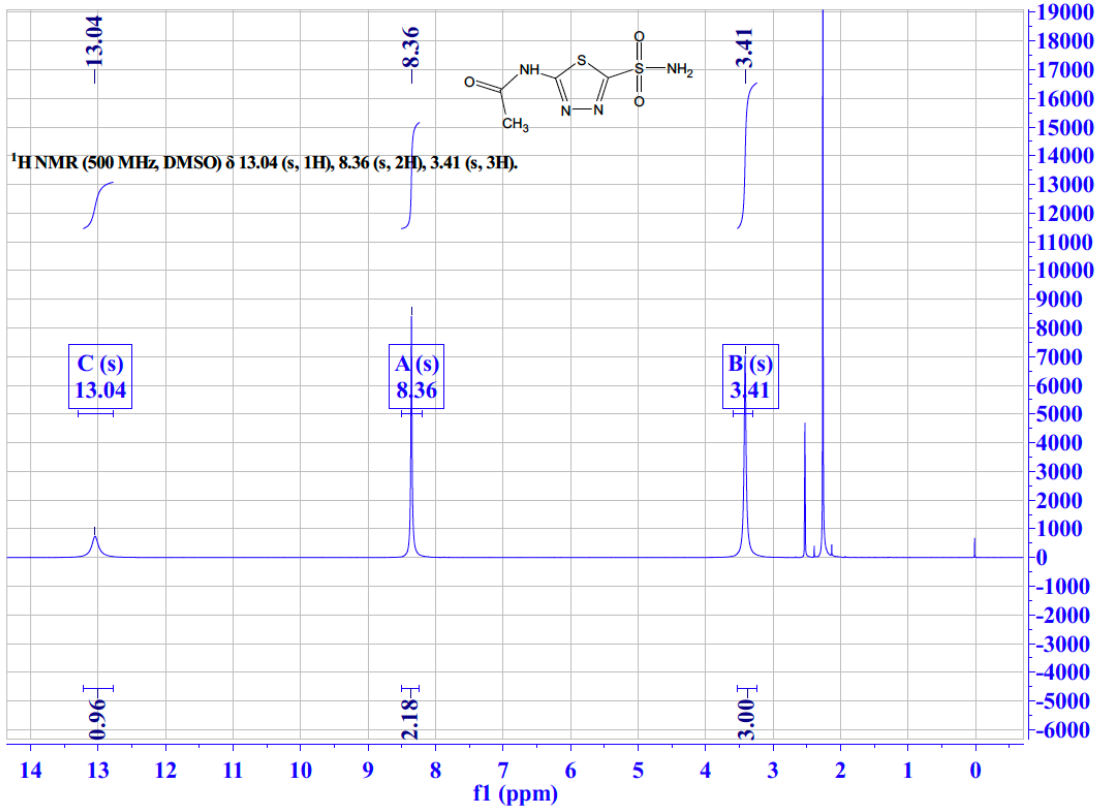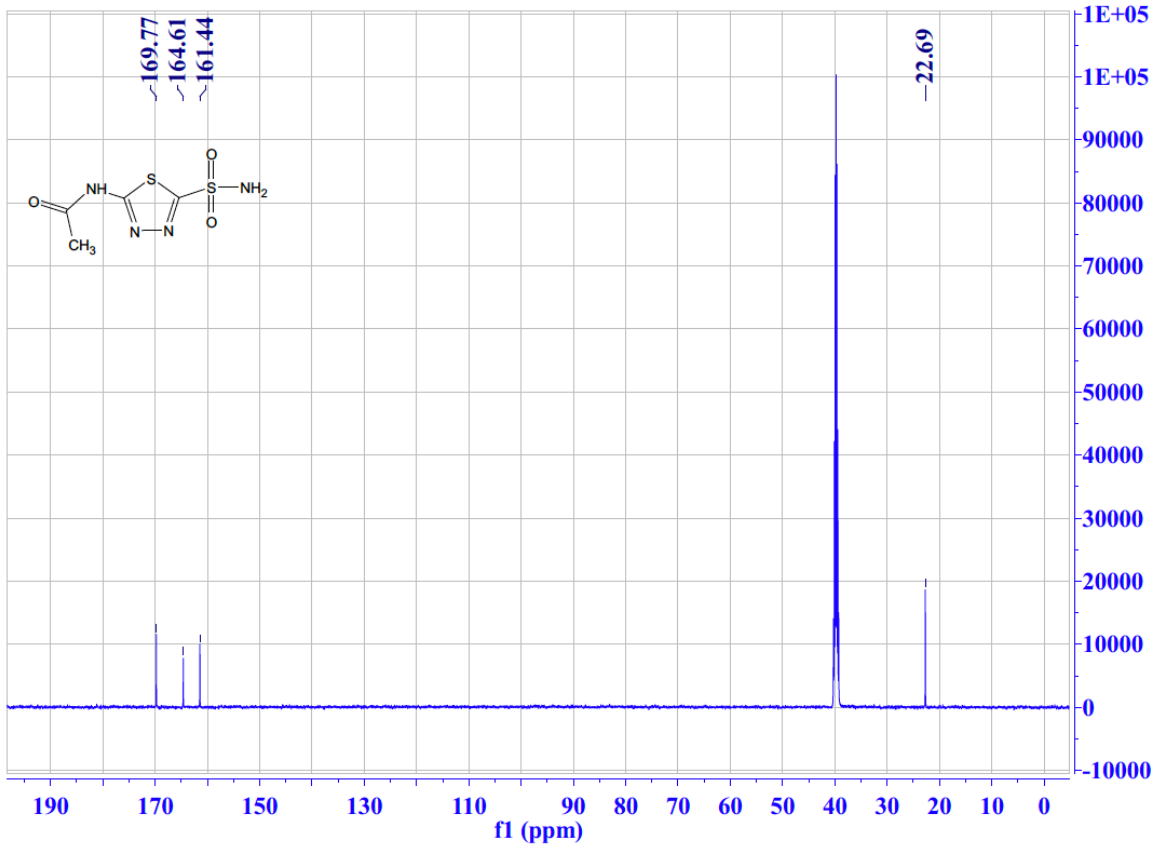

Acetazolamide  
 Mass Spectrum  
 MW = 222.0 g/mol

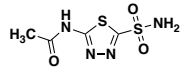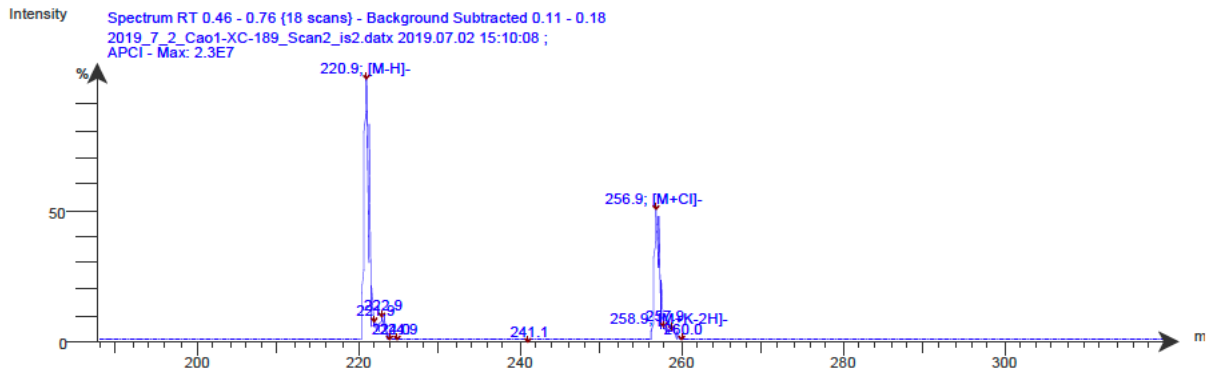

HPLC

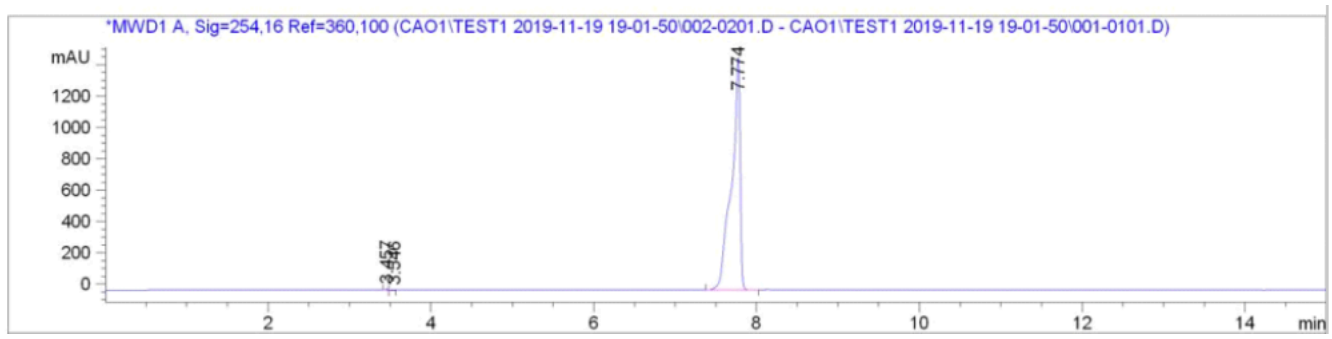

| Peak # | RetTime [min] | Type | Width [min] | Area [mAU*s] | Height [mAU] | Area %  |
|--------|---------------|------|-------------|--------------|--------------|---------|
| 1      | 3.457         | BV   | 0.0275      | 15.71164     | 8.53279      | 0.1453  |
| 2      | 3.546         | VV   | 0.0526      | 8.35287      | 2.40186      | 0.0772  |
| 3      | 7.774         | BV   | 0.0971      | 1.07917e4    | 1479.27307   | 99.7775 |

# Compound 3

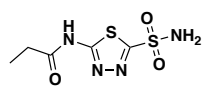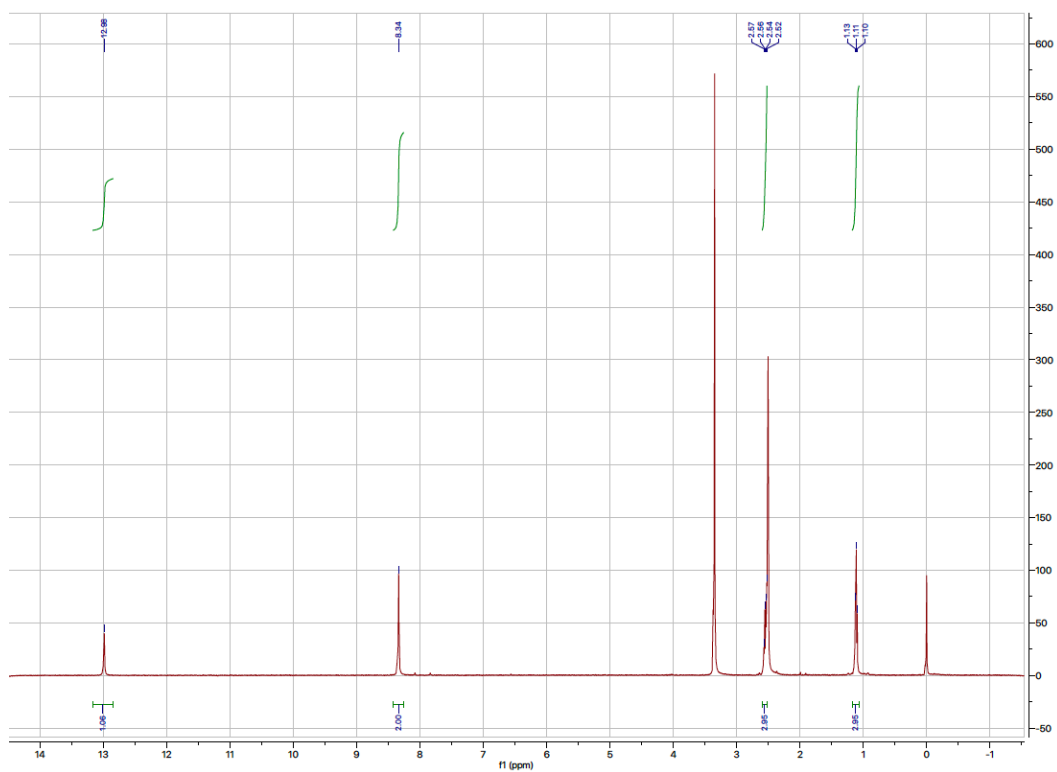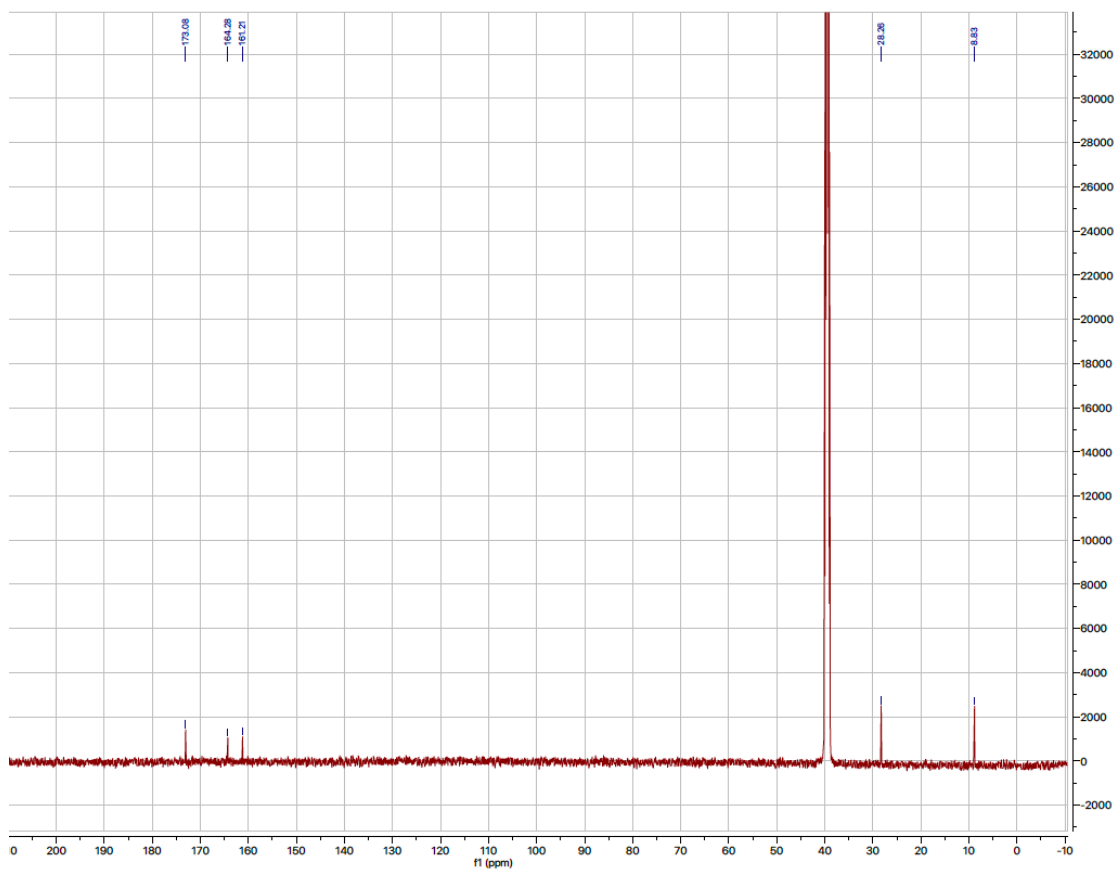

Compound 3  
 Mass Spectrum  
 MW = 236.0 g/mol

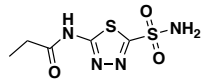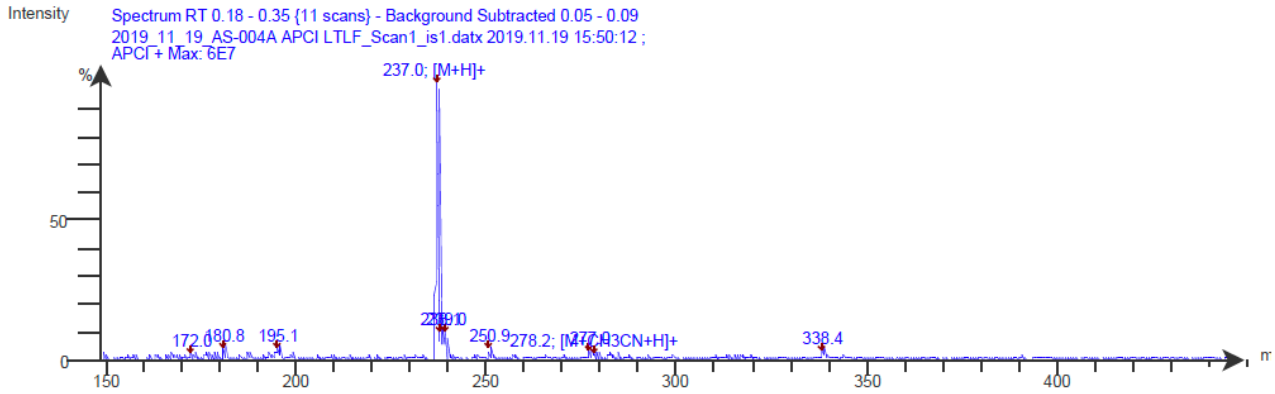

HPLC

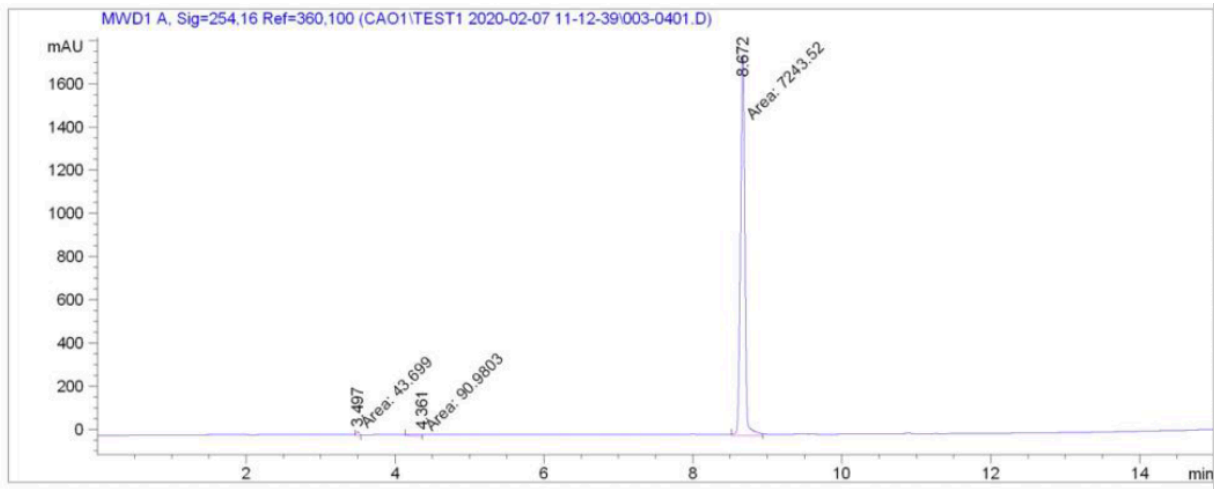

Signal 1: MWD1 A, Sig=254,16 Ref=360,100

| Peak # | RetTime [min] | Type | Width [min] | Area [mAU*s] | Height [mAU] | Area %  |
|--------|---------------|------|-------------|--------------|--------------|---------|
| 1      | 3.497         | MM   | 0.0410      | 43.69899     | 17.78201     | 0.5923  |
| 2      | 4.361         | MM   | 0.1648      | 90.98032     | 9.19831      | 1.2331  |
| 3      | 8.672         | MM   | 0.0687      | 7243.51904   | 1757.90405   | 98.1746 |

Totals : 7378.19836 1784.88437

Compound 4

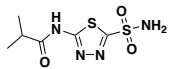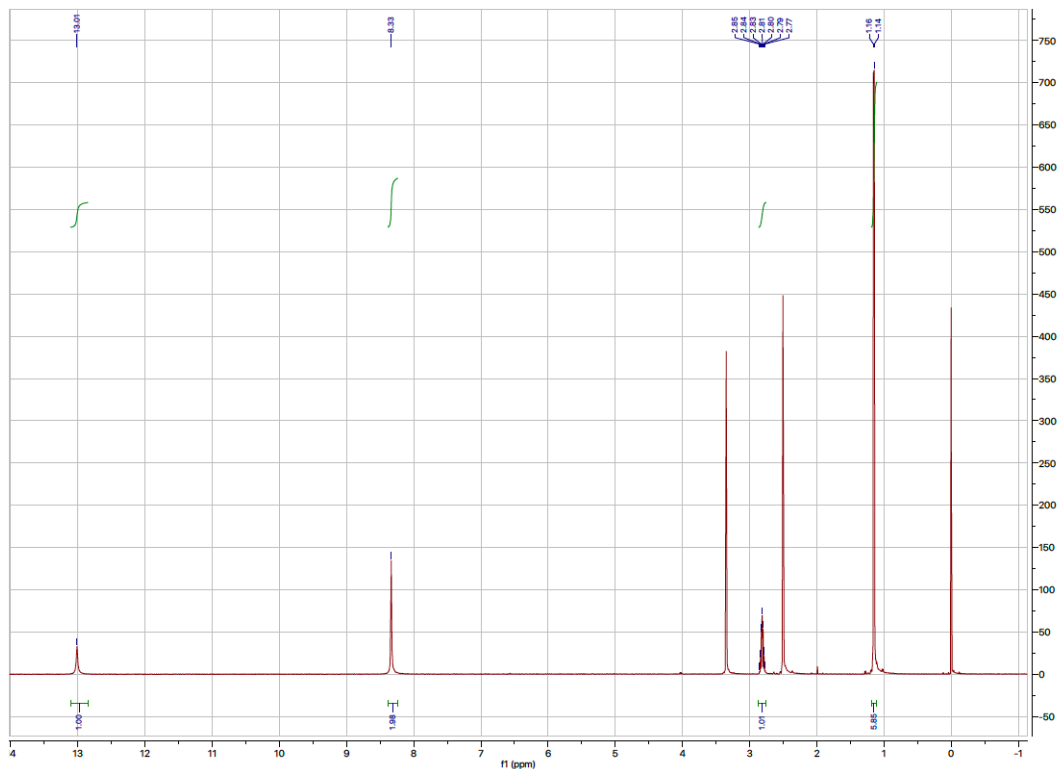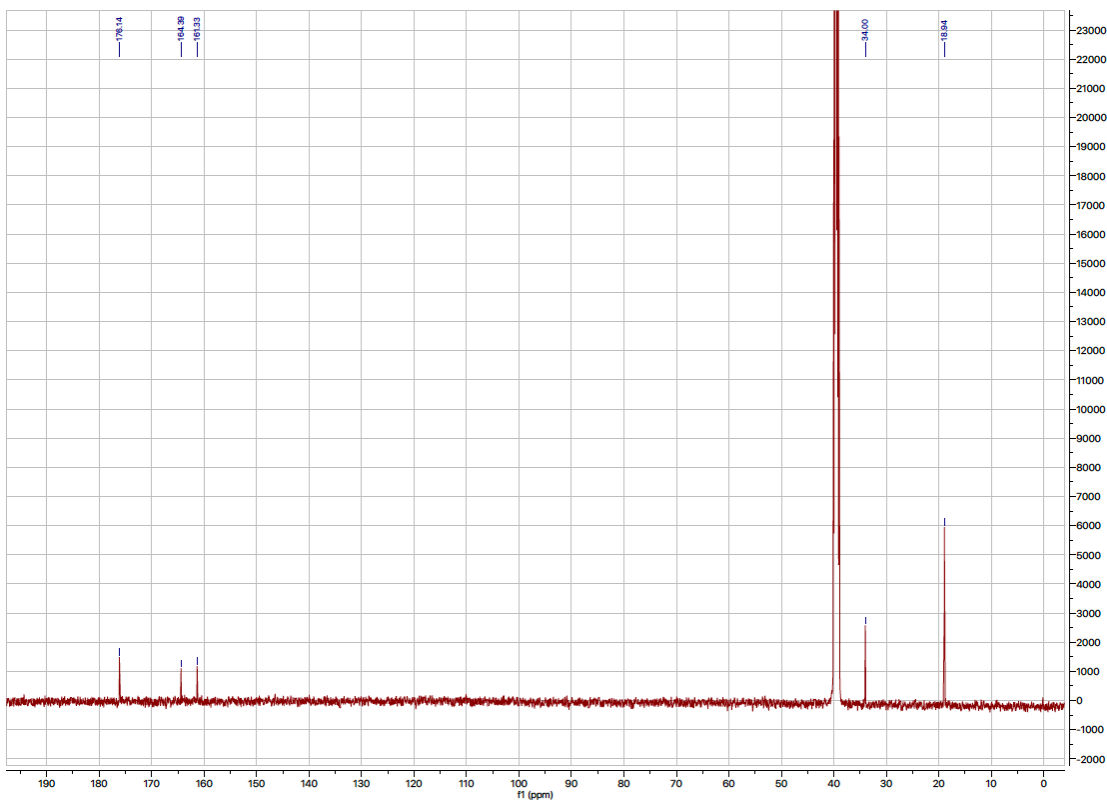

Compound 4  
Mass Spectrum

MW = 250.0 g/mol

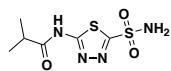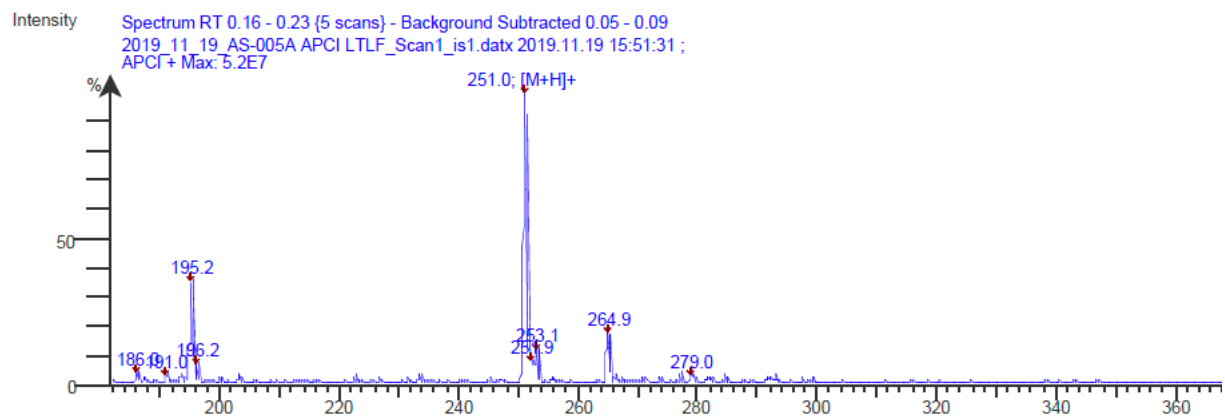

HPLC

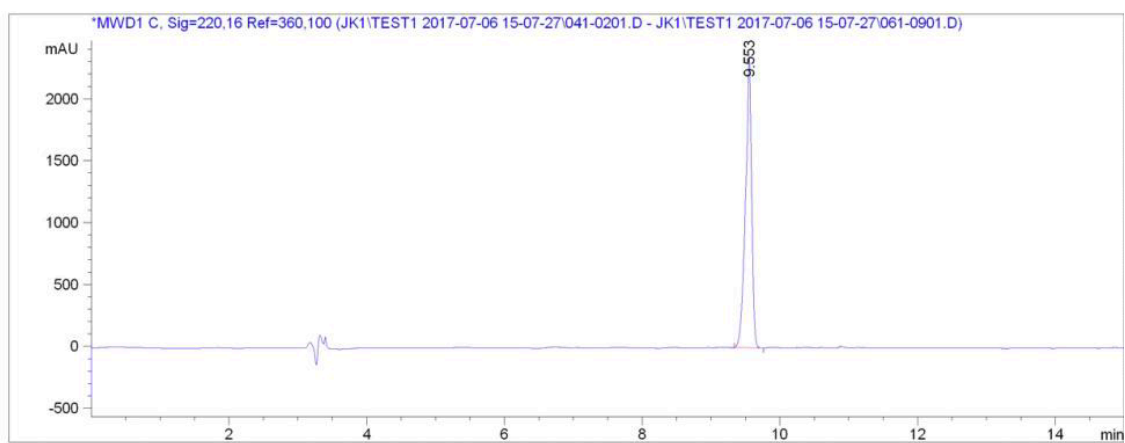

| Peak # | RetTime [min] | Type | Width [min] | Area [mAU*s] | Height [mAU] | Area %   |
|--------|---------------|------|-------------|--------------|--------------|----------|
| 1      | 9.553         | BB   | 0.0879      | 1.44415e4    | 2344.75171   | 100.0000 |

Compound 5

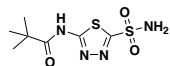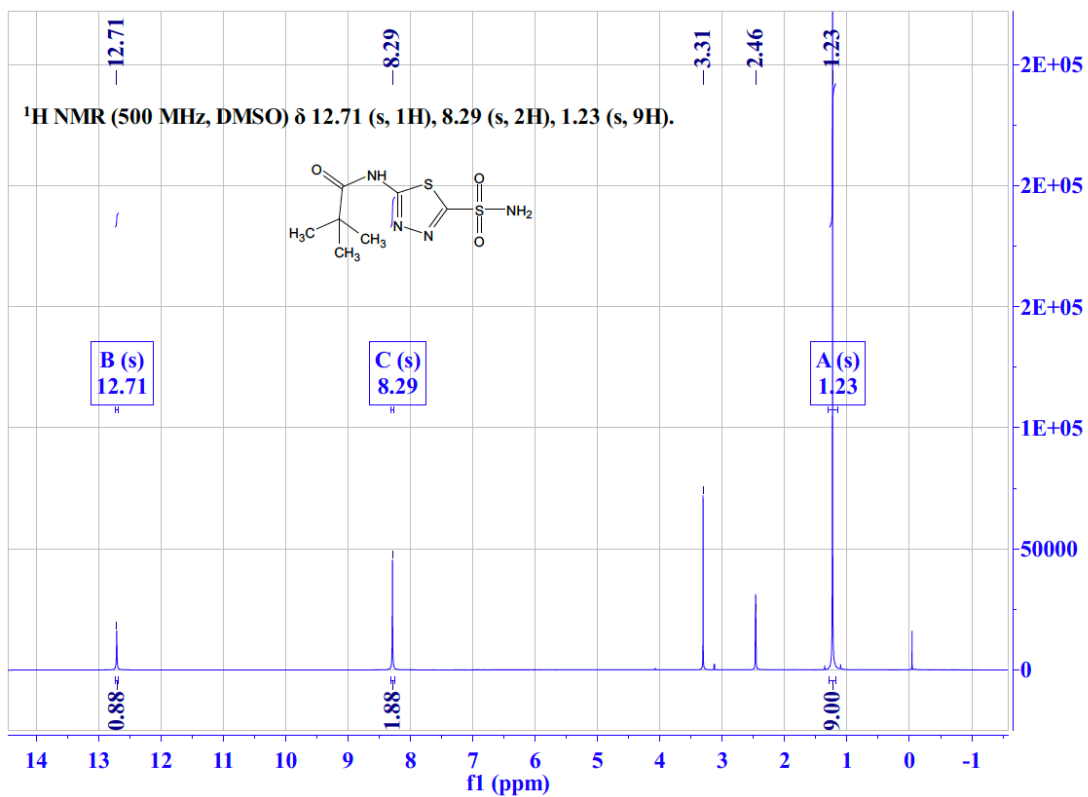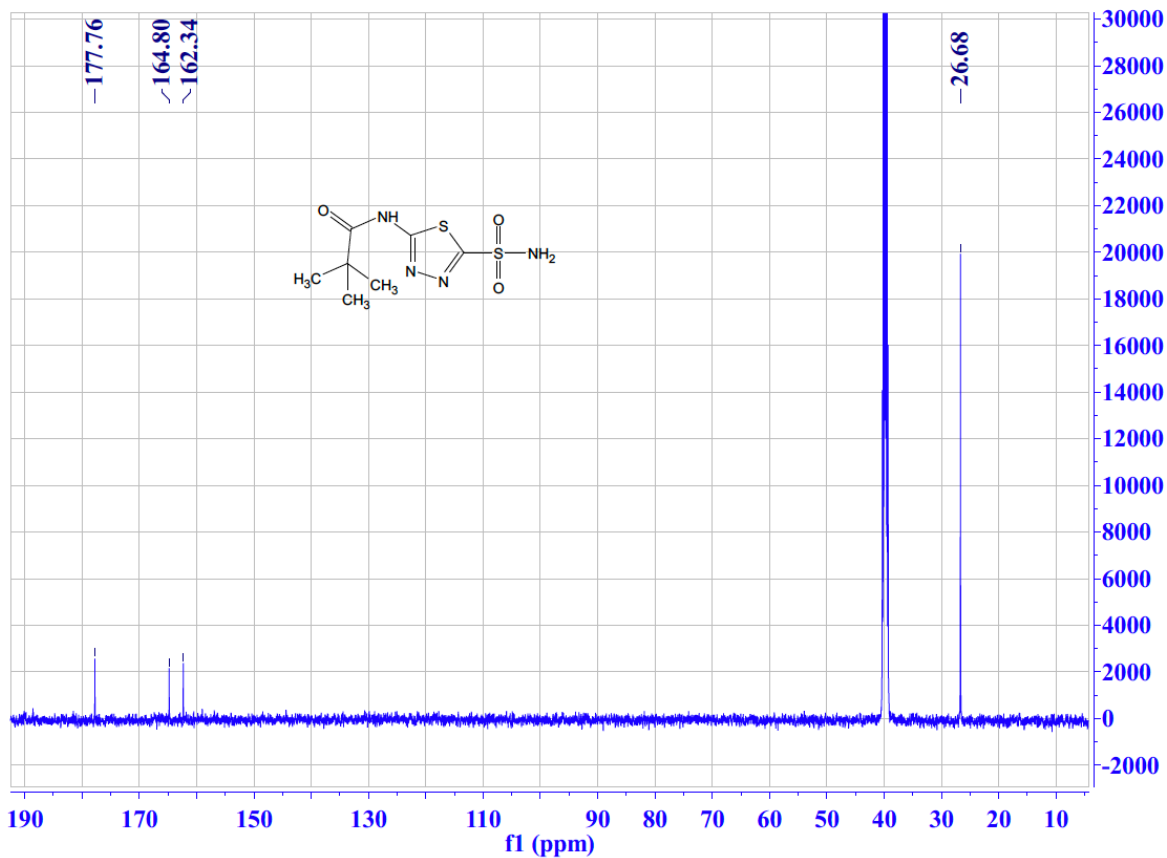

# Compound 5

## Mass Spectrum

MW = 264.0 g/mol

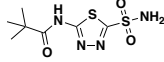

Spectrum RT 0.95 - 1.03 (6 scans) - Background Subtracted 0.58 - 0.89  
AS-004B\_Scan1\_is1.datx 2018.10.23 09:59:35 ;  
Intensity APCI + Max: 1.5E9

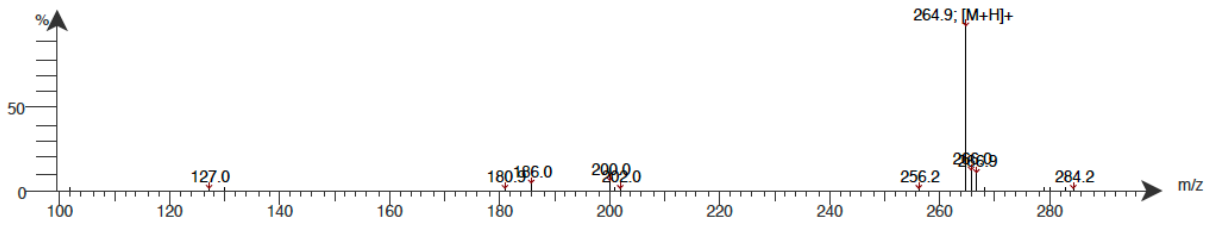

## HPLC

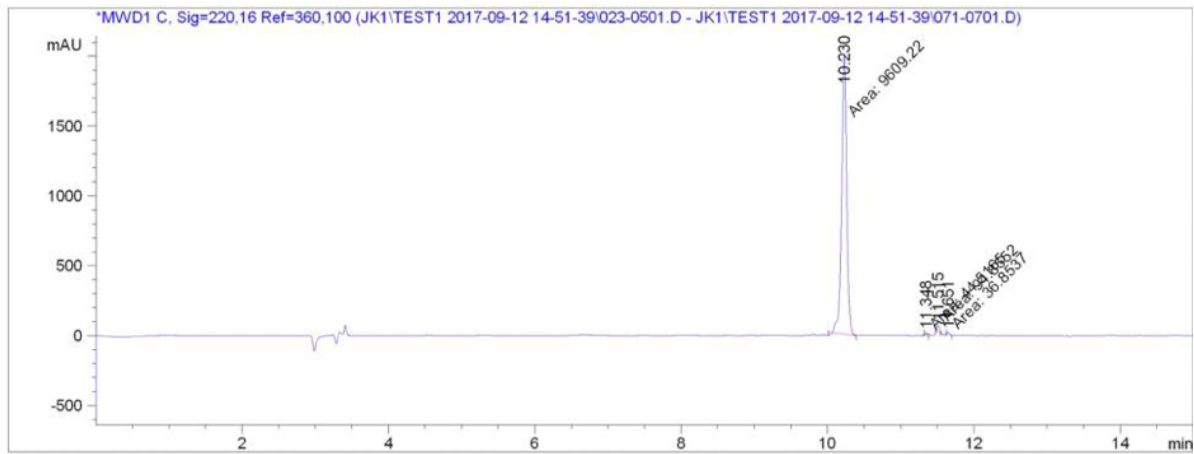

| Peak # | RetTime [min] | Type | Width [min] | Area [mAU*s] | Height [mAU] | Area %  |
|--------|---------------|------|-------------|--------------|--------------|---------|
| 1      | 10.230        | MM   | 0.0795      | 9609.22363   | 2014.44910   | 98.1991 |
| 2      | 11.348        | MM   | 0.0400      | 44.51651     | 18.54683     | 0.4549  |
| 3      | 11.515        | MM   | 0.0347      | 94.85516     | 45.61765     | 0.9693  |
| 4      | 11.651        | MM   | 0.0361      | 36.85370     | 17.00449     | 0.3766  |



Compound 6

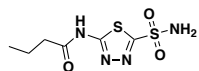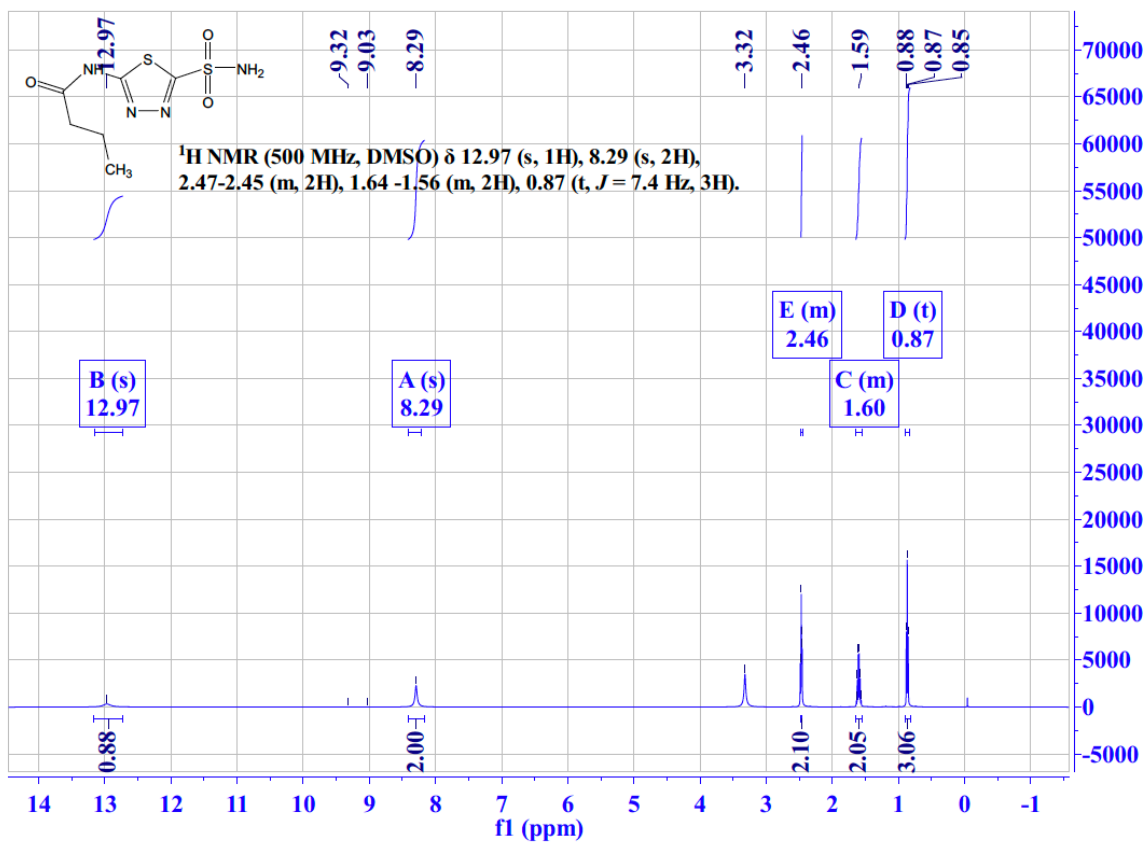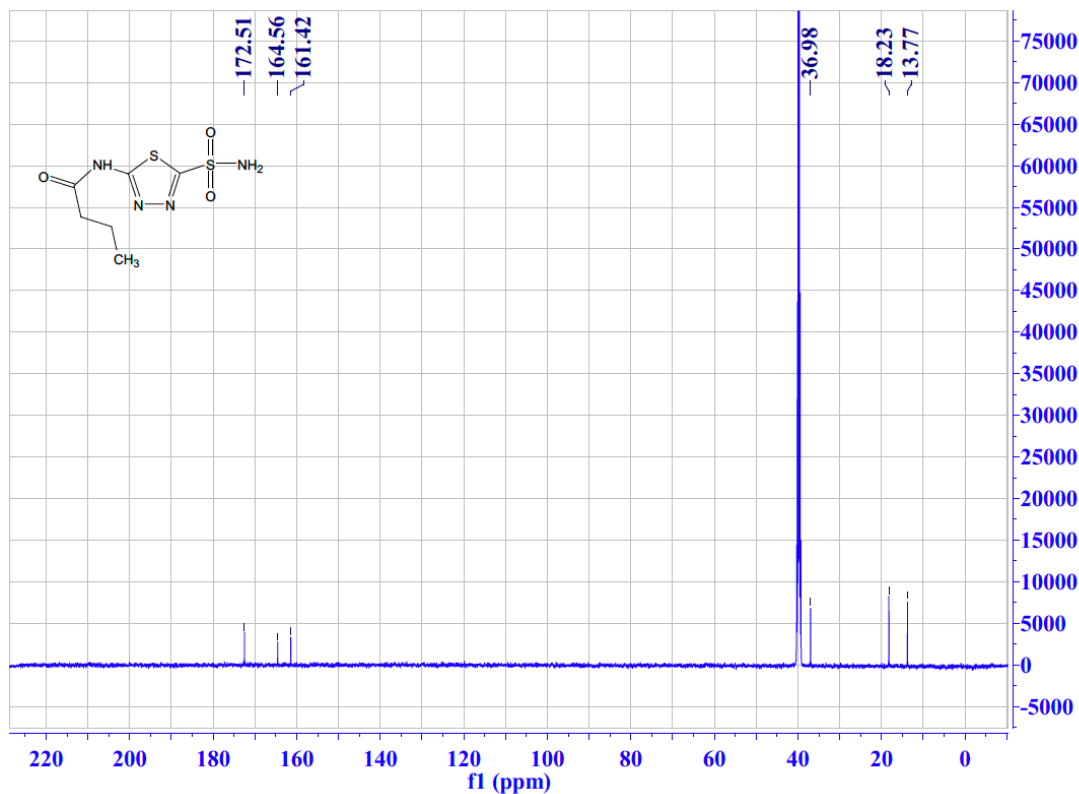

Compound 6  
Mass Spectrum

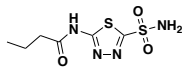

MW = 250.0 g/mol

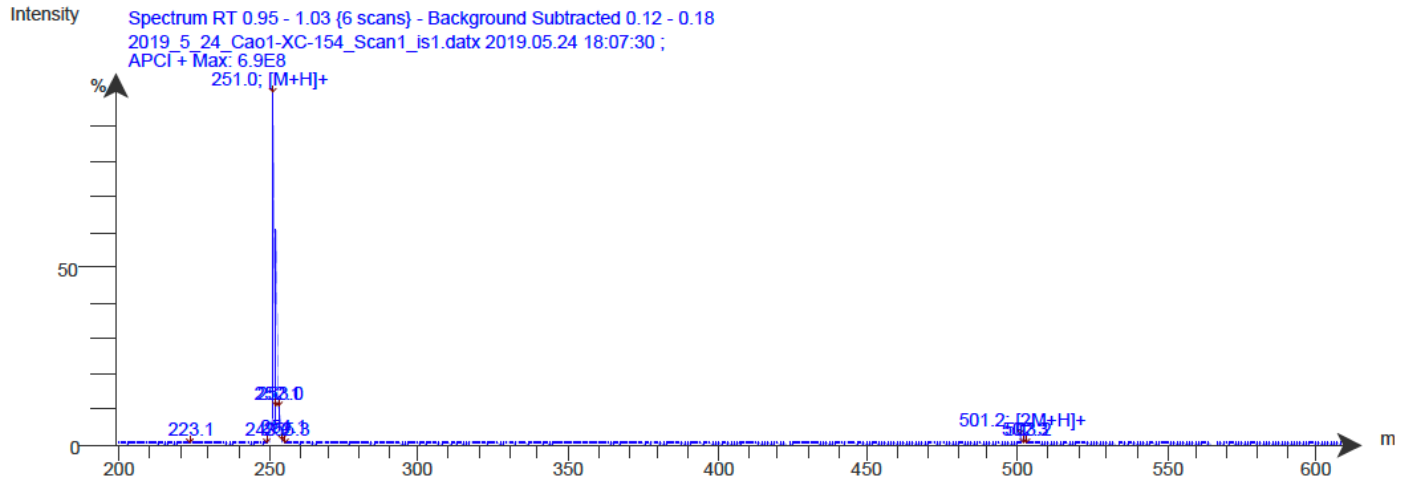

HPLC

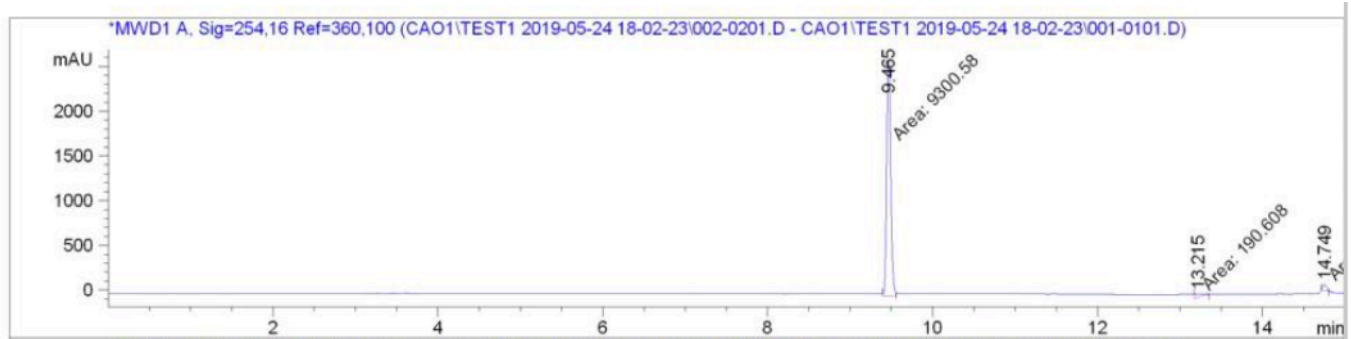

| Peak # | RetTime [min] | Type | Width [min] | Area [mAU*s] | Height [mAU] | Area %  |
|--------|---------------|------|-------------|--------------|--------------|---------|
| 1      | 9.465         | MM   | 0.0589      | 9300.58301   | 2631.44800   | 95.9162 |
| 2      | 13.215        | MM   | 0.0801      | 190.60754    | 32.58271     | 1.9657  |
| 3      | 14.749        | MM   | 0.0545      | 205.38501    | 62.79972     | 2.1181  |

Totals : 9696.57556 2726.83043

# Compound 7

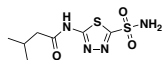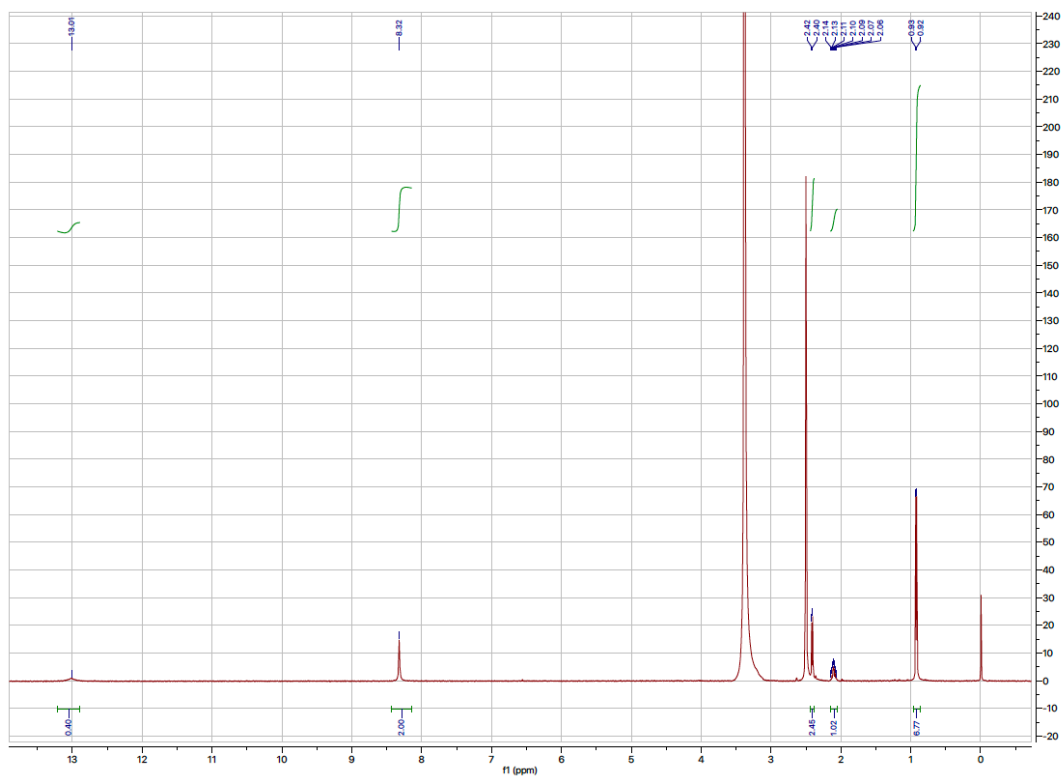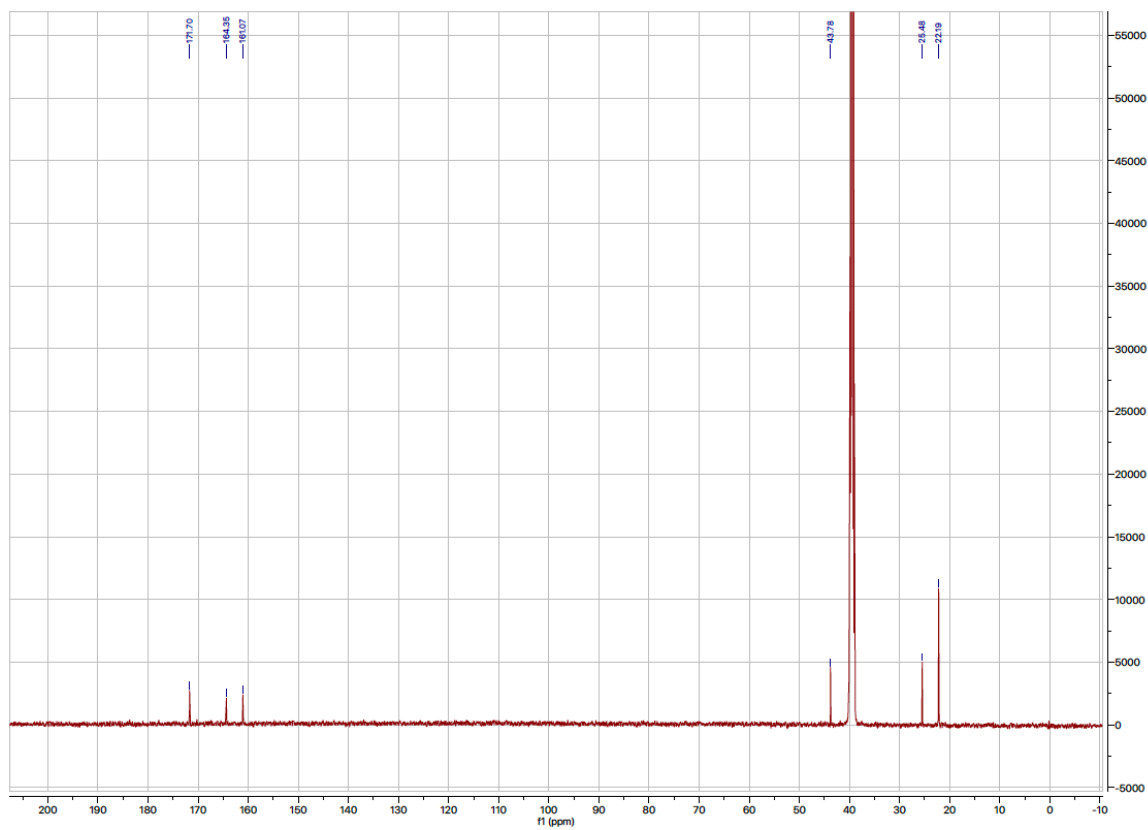

Compound 7  
Mass Spectrum

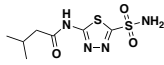

MW = 264.0 g/mol

Spectrum RT 0.79 - 0.84 (4 scans) - Background Subtracted 0.44 - 0.67  
AS-005M\_Scan1\_is1.datx 2018.10.25 15:38:28 ;  
APCI + Max: 1.1E9

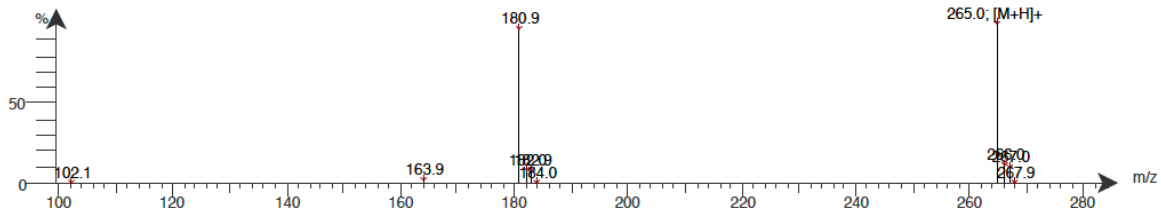

HPLC

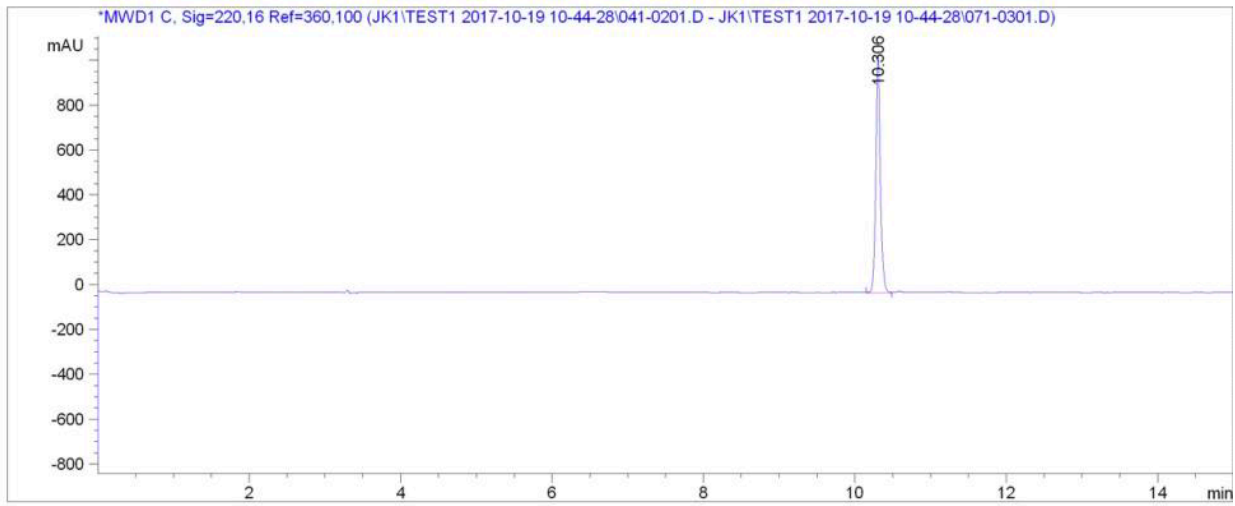

| Peak # | RetTime [min] | Type | Width [min] | Area [mAU*s] | Height [mAU] | Area %   |
|--------|---------------|------|-------------|--------------|--------------|----------|
| 1      | 10.306        | VV   | 0.0604      | 4393.40186   | 1058.43591   | 100.0000 |

# Compound 8

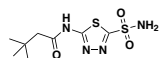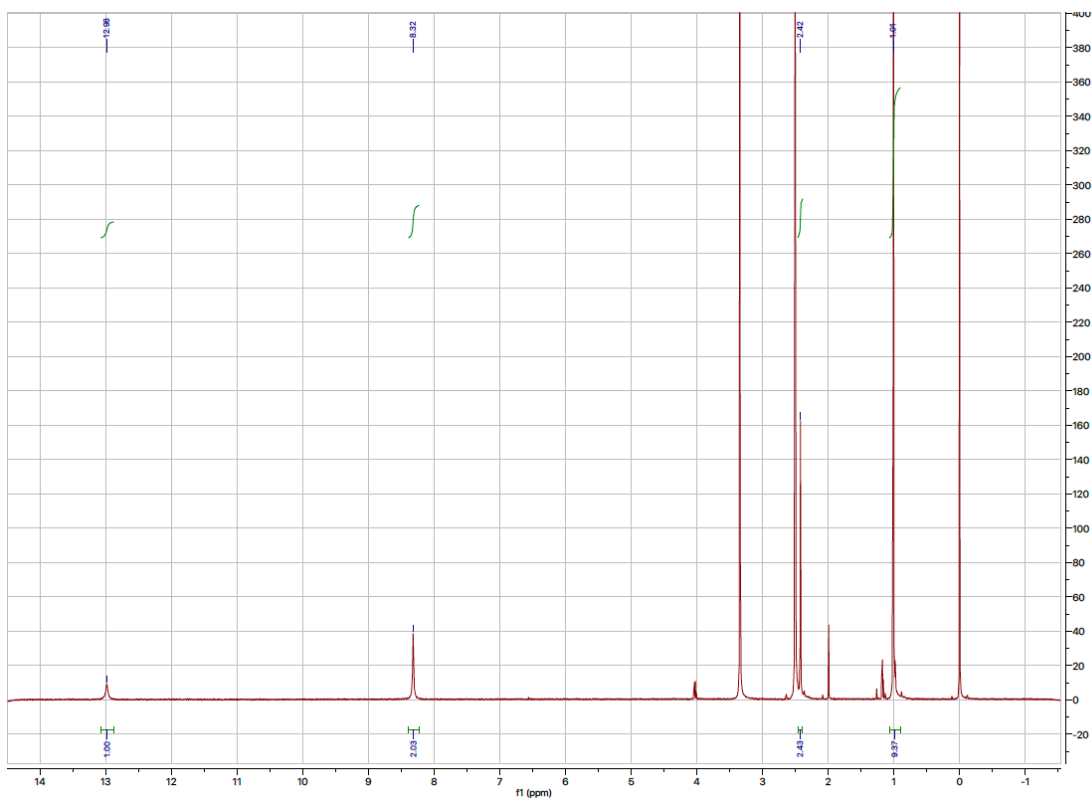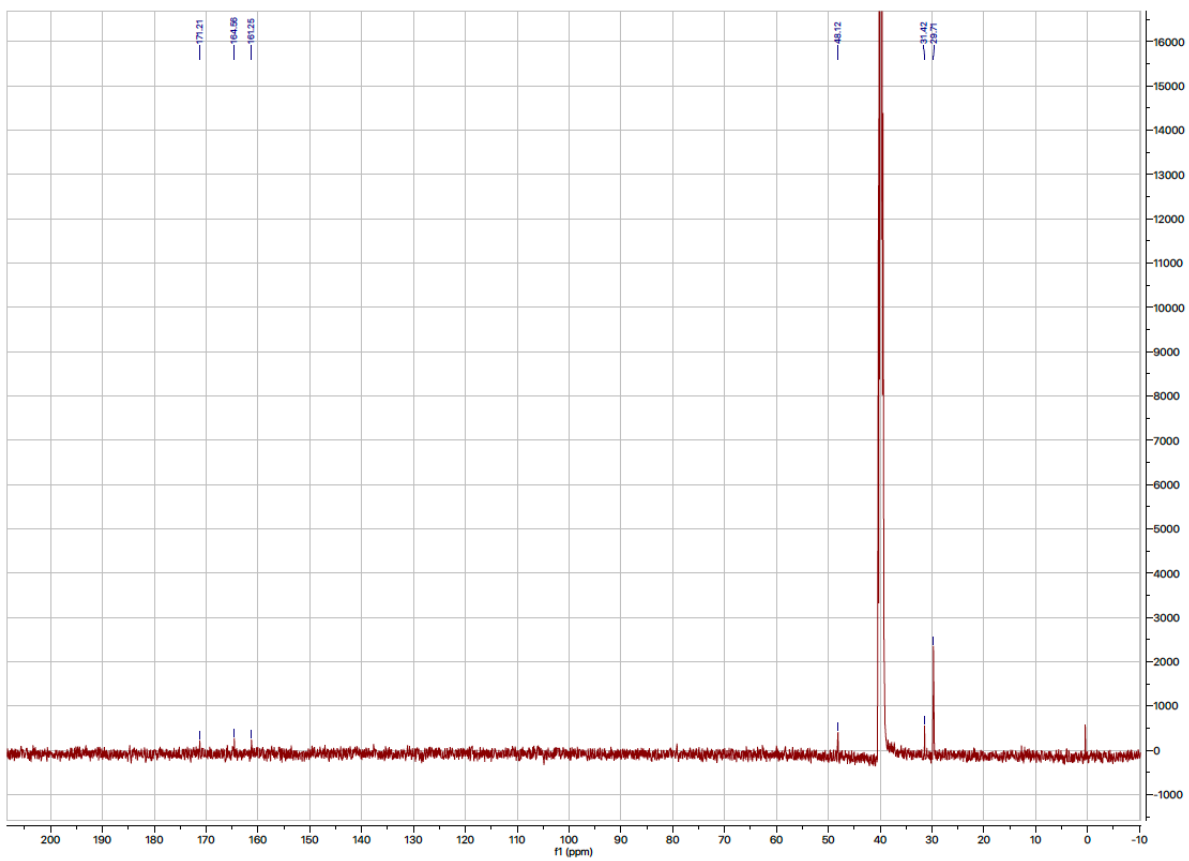

Compound 8  
Mass Spectrum  
MW = 278.0 g/mol

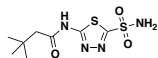

Spectrum RT 0.74 - 0.93 (12 scans) - Background Subtracted 0.30 - 0.56  
AS-005L\_Scan1\_is1.datx 2018.10.25 15:42:51 ;  
APCI+ Max: 1.7E9

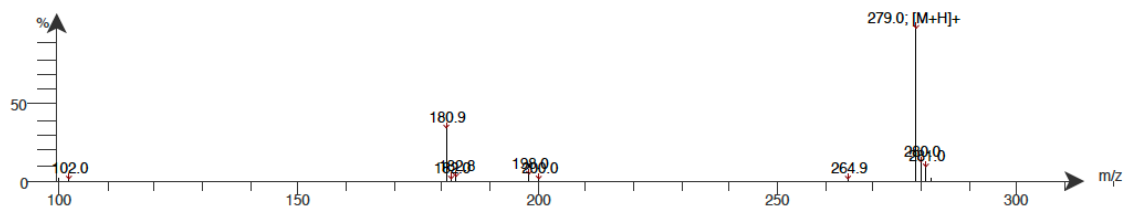

HPLC

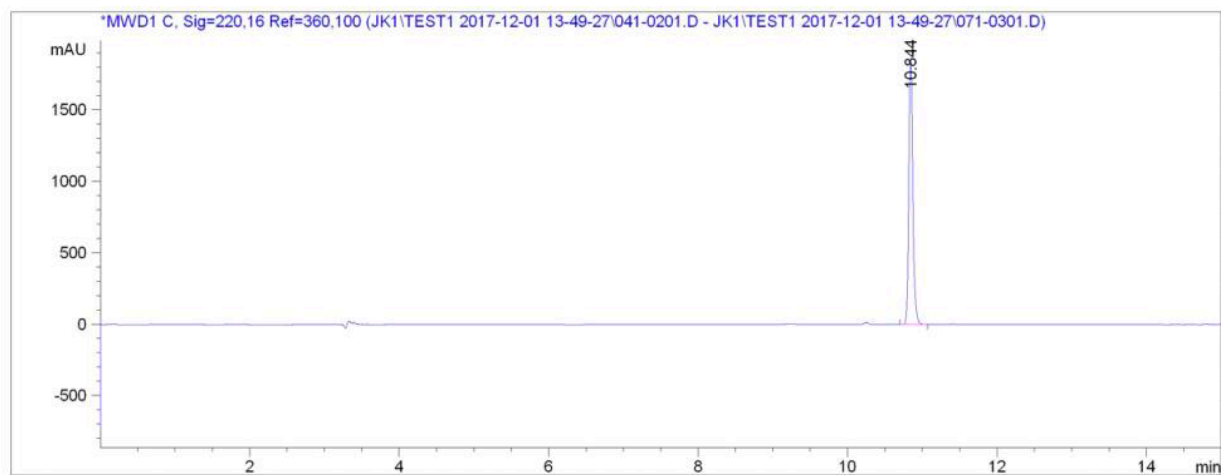

| Peak # | RetTime [min] | Type | Width [min] | Area [mAU*s] | Height [mAU] | Area %   |
|--------|---------------|------|-------------|--------------|--------------|----------|
| 1      | 10.844        | VV   | 0.0579      | 7017.20166   | 1866.67554   | 100.0000 |

Compound 9

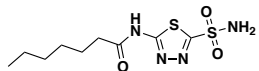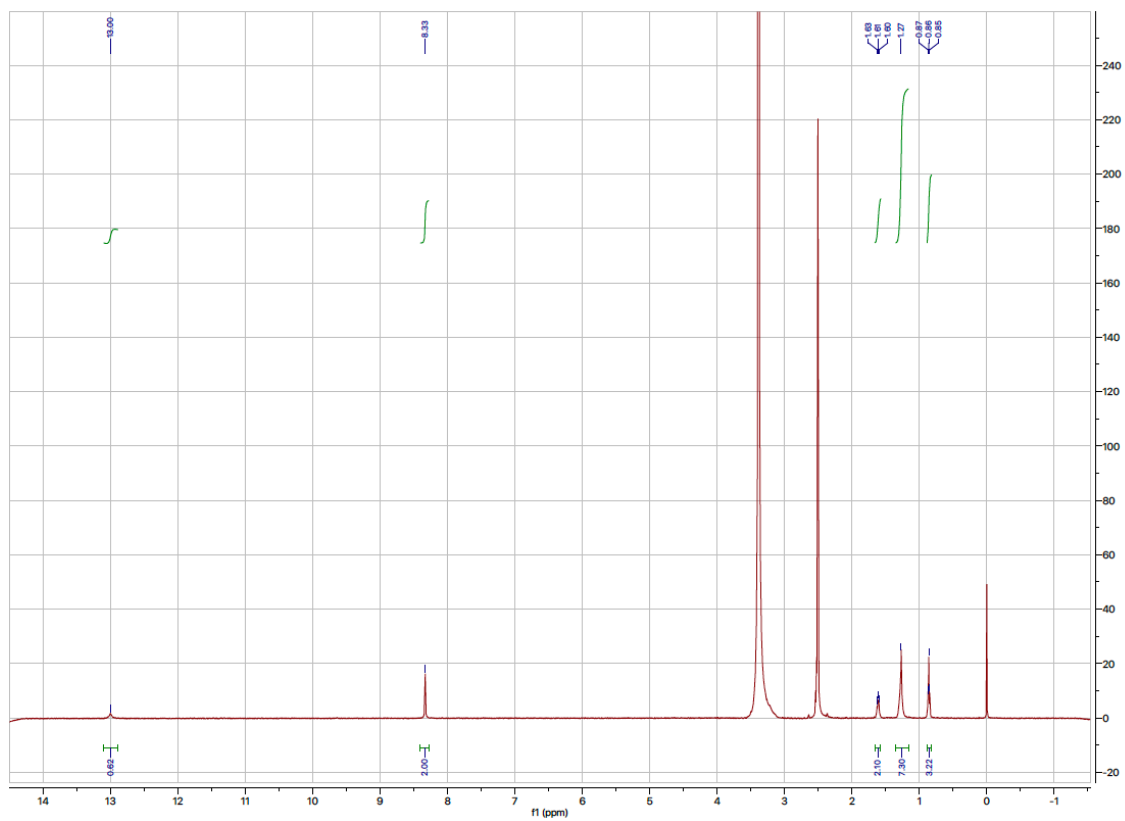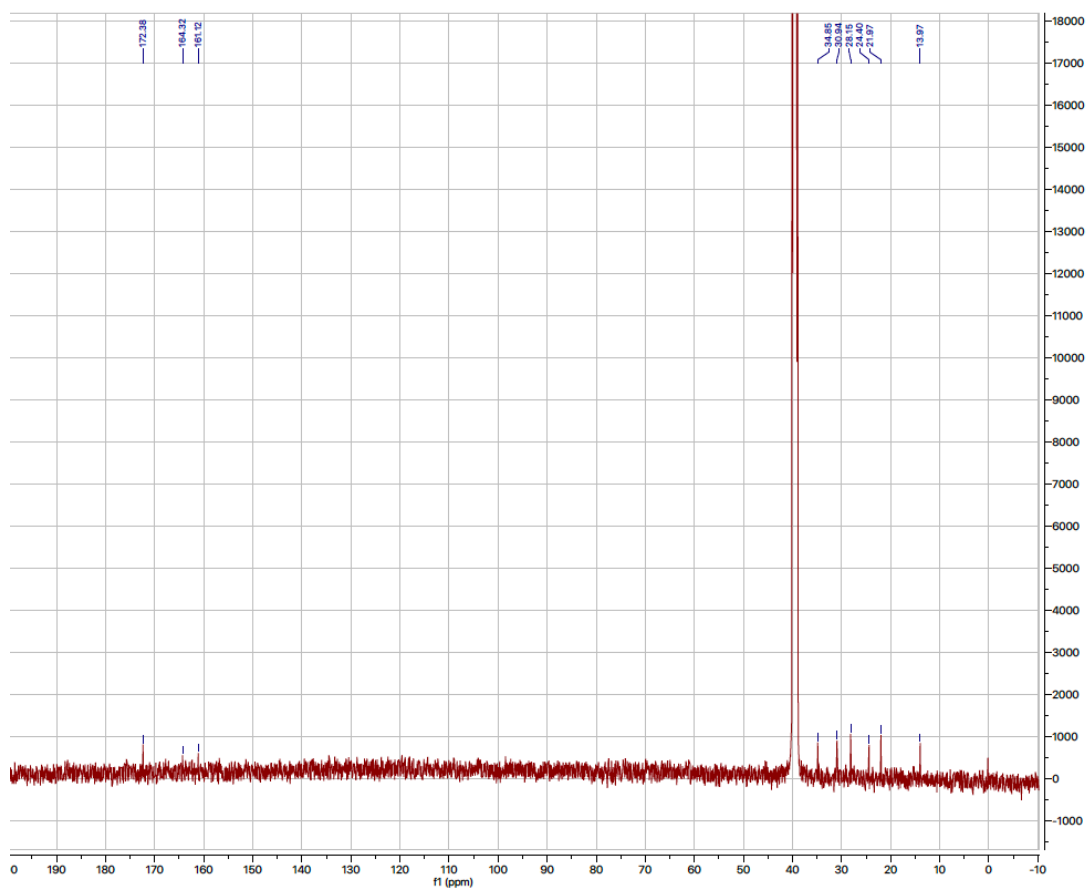

Compound 9  
 Mass Spectrum  
 MW = 292.0 g/mol

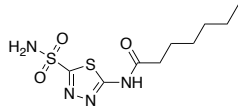

Spectrum RT 0.54 - 0.68 (9 scans) - Background Subtracted 0.18 - 0.44  
 AS-005N\_Scan1\_is1.datx 2018.10.25 15:40:43 ;  
 APCI+ Max: 1E9

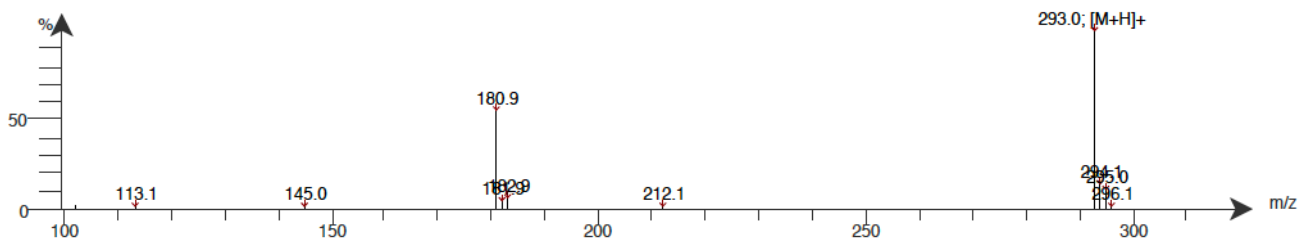

HPLC

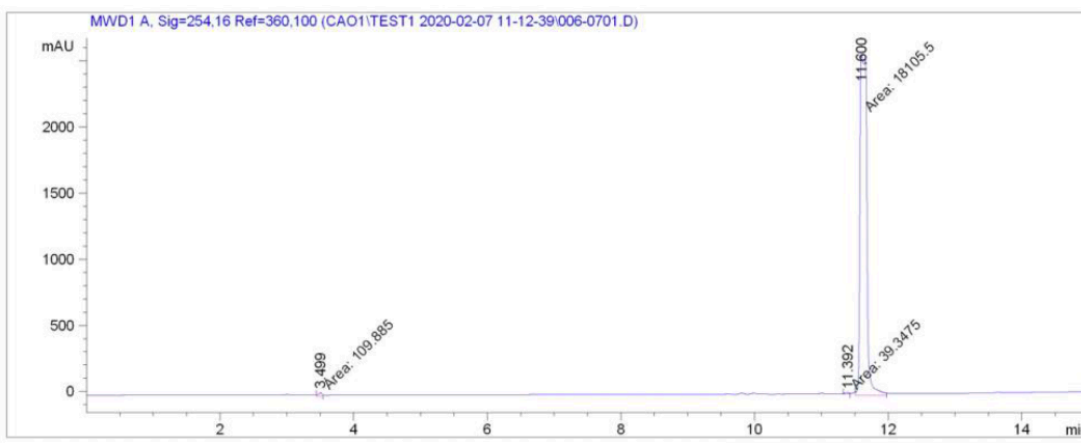

Signal 1: MWD1 A, Sig=254,16 Ref=360,100

| Peak # | RetTime [min] | Type | Width [min] | Area [mAU*s] | Height [mAU] | Area %  |
|--------|---------------|------|-------------|--------------|--------------|---------|
| 1      | 3.499         | MM   | 0.0638      | 109.88451    | 28.69182     | 0.6020  |
| 2      | 11.392        | MM   | 0.0723      | 39.34745     | 9.07049      | 0.2155  |
| 3      | 11.600        | MM   | 0.1172      | 1.81055e4    | 2574.85400   | 99.1825 |



Compound 10

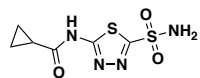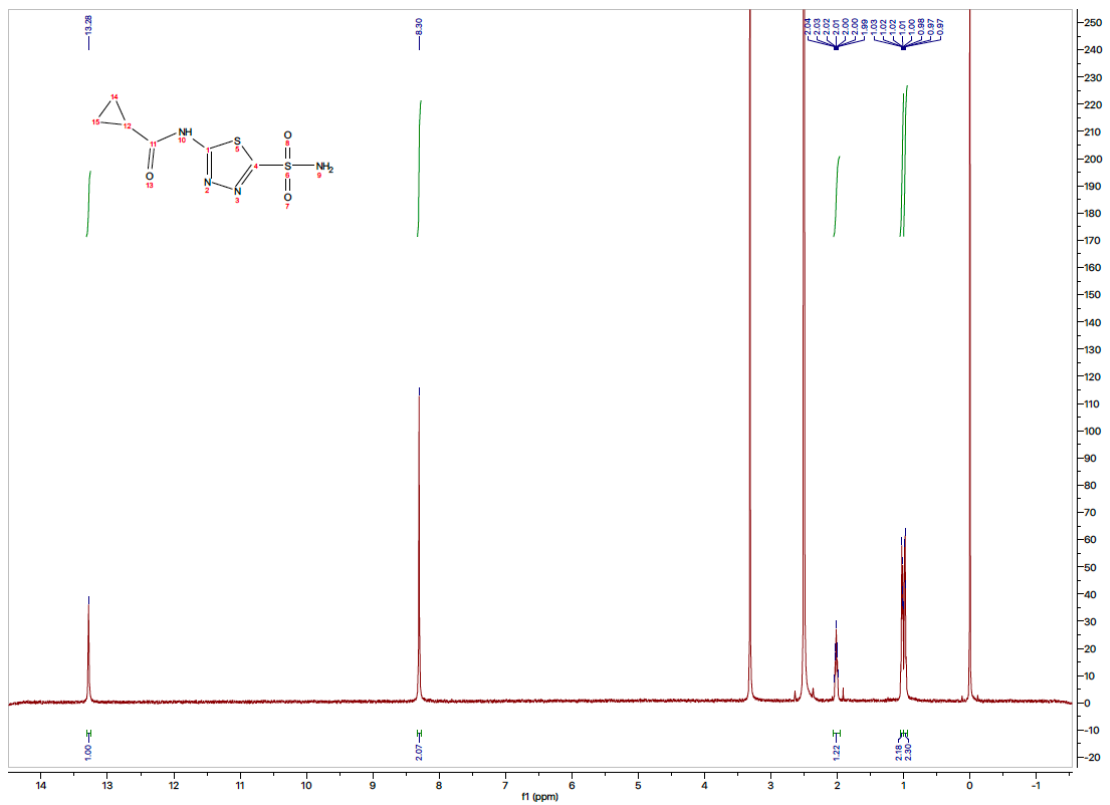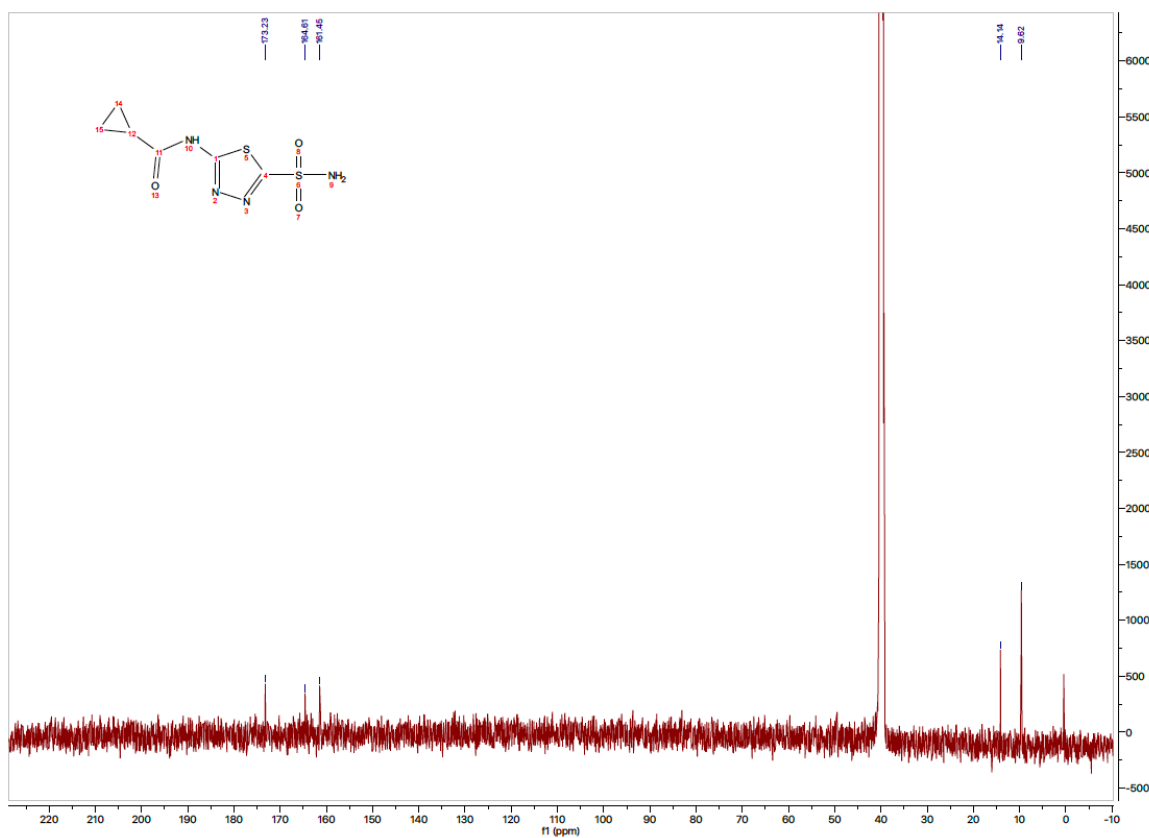

Compound 10  
 Mass Spectrum  
 MW = 248.0 g/mol

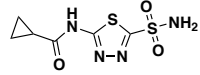

Spectrum RT 0.68 - 0.81 (8 scans) - Background Subtracted 0.47 - 0.63  
 DF1-293\_Scan1\_is1 2018.10.31 13:17:15 ;  
 APCI + Max: 2.8E8

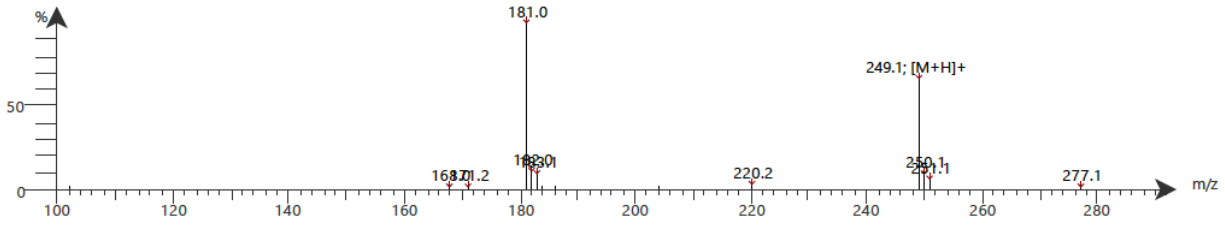

HPLC

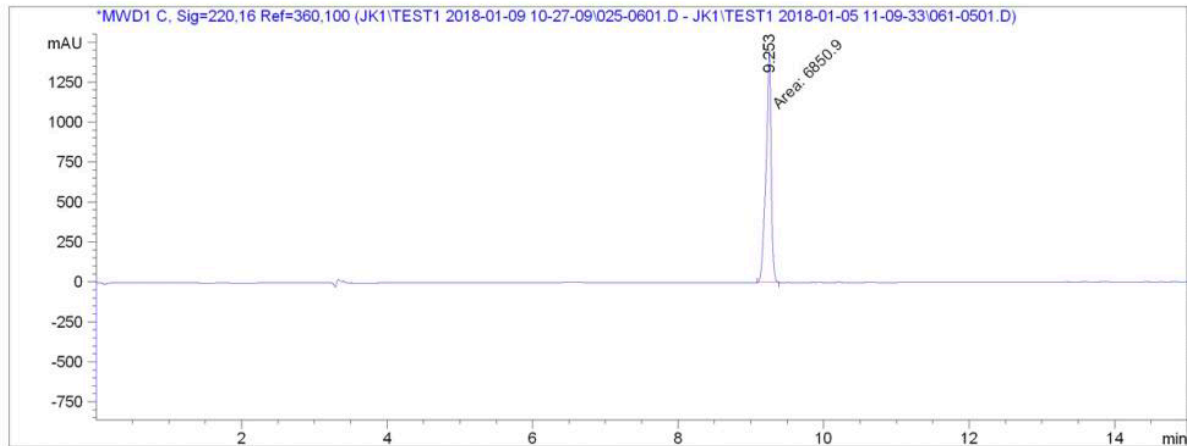

| Peak # | RetTime [min] | Type | Width [min] | Area [mAU*s] | Height [mAU] | Area %   |
|--------|---------------|------|-------------|--------------|--------------|----------|
| 1      | 9.253         | MM   | 0.0789      | 6850.89795   | 1447.02051   | 100.0000 |

Compound 11

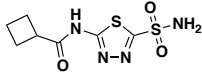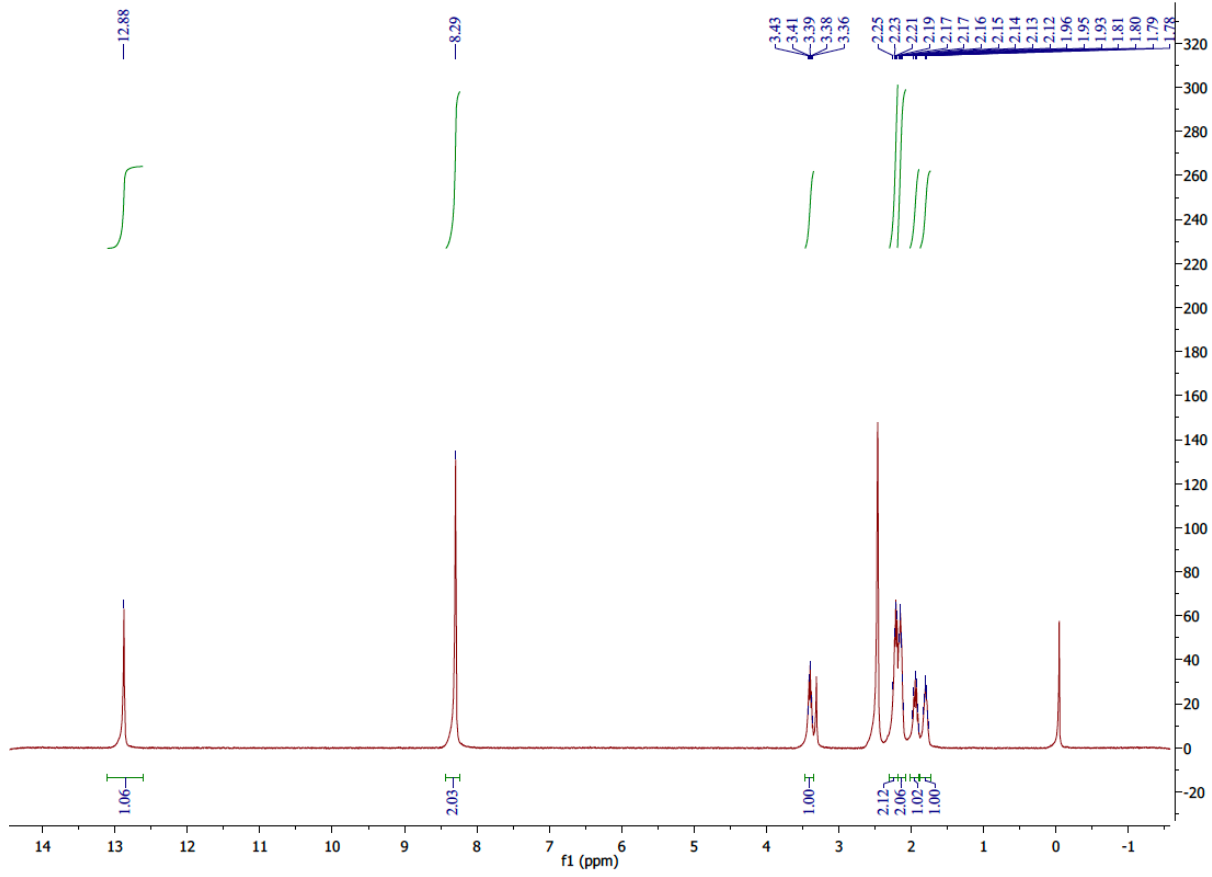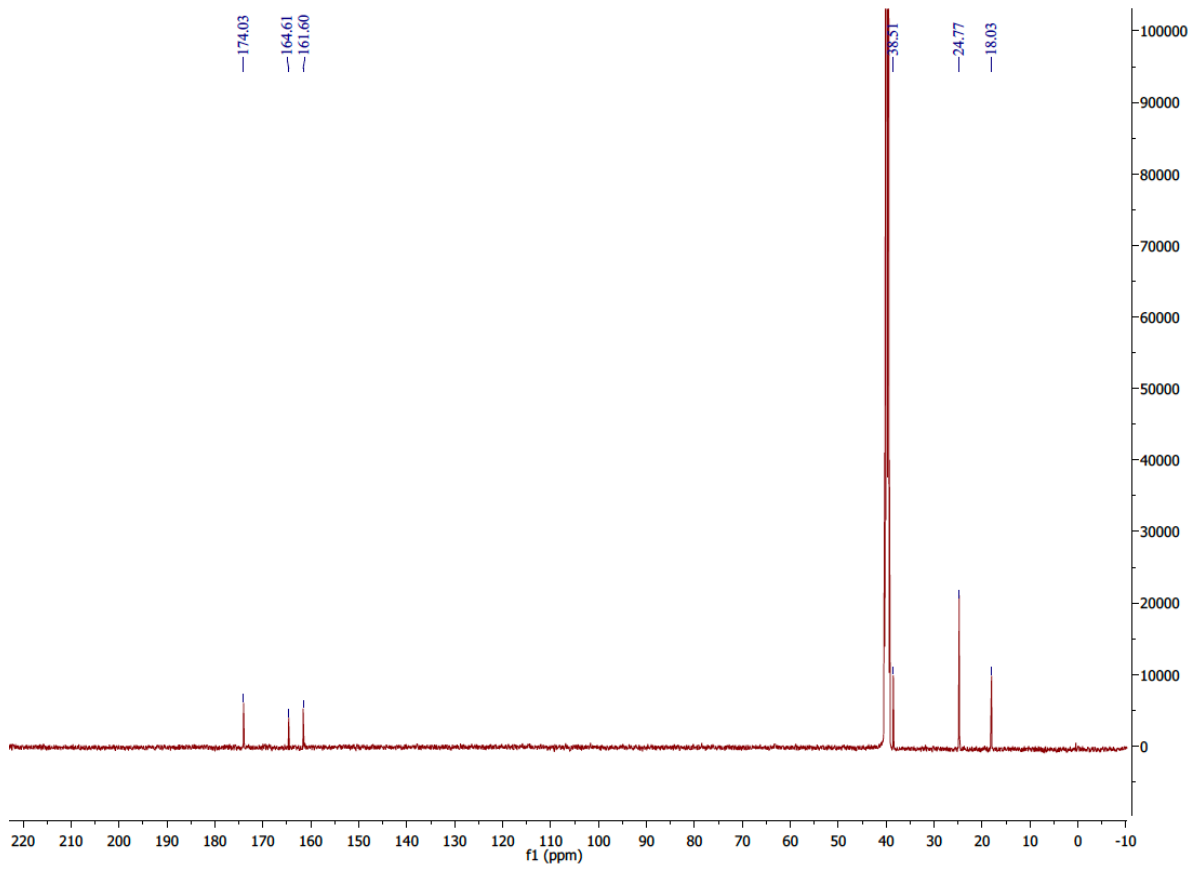

Compound 11  
 Mass Spectrum  
 MW = 262.0 g/mol

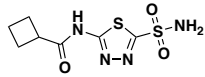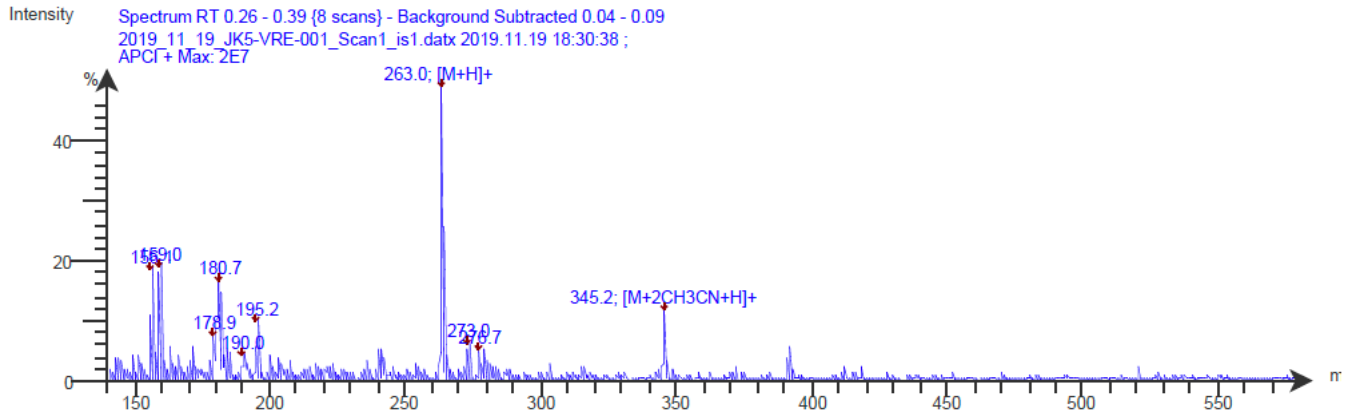

### HPLC

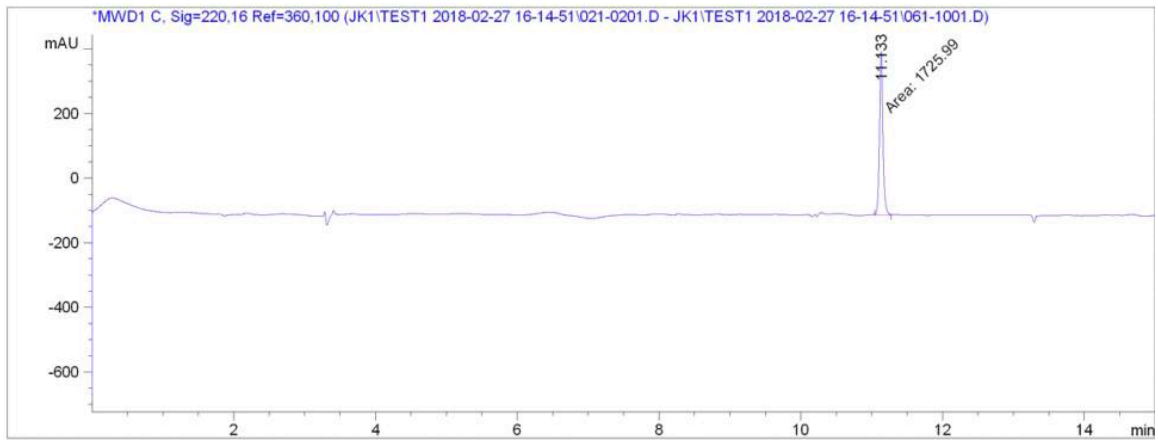

| Peak # | RetTime [min] | Type | Width [min] | Area [mAU*s] | Height [mAU] | Area %   |
|--------|---------------|------|-------------|--------------|--------------|----------|
| 1      | 11.133        | MM   | 0.0566      | 1725.99084   | 508.44470    | 100.0000 |

Compound 12

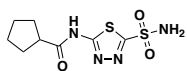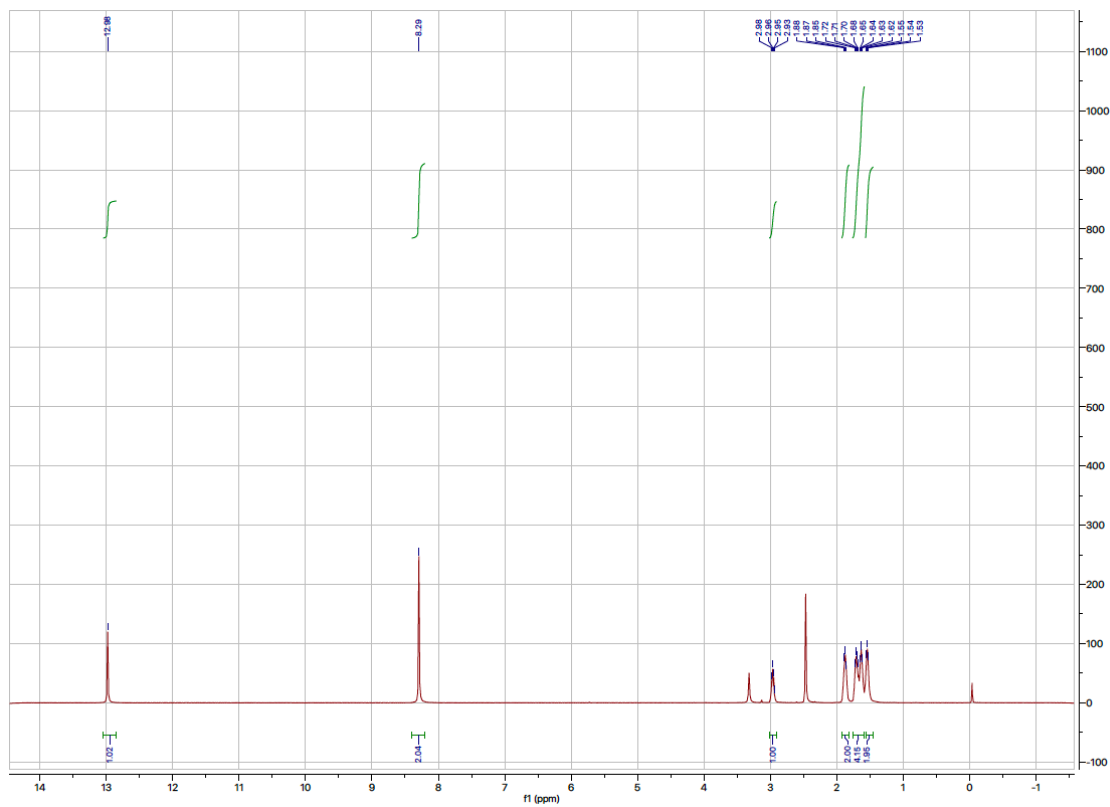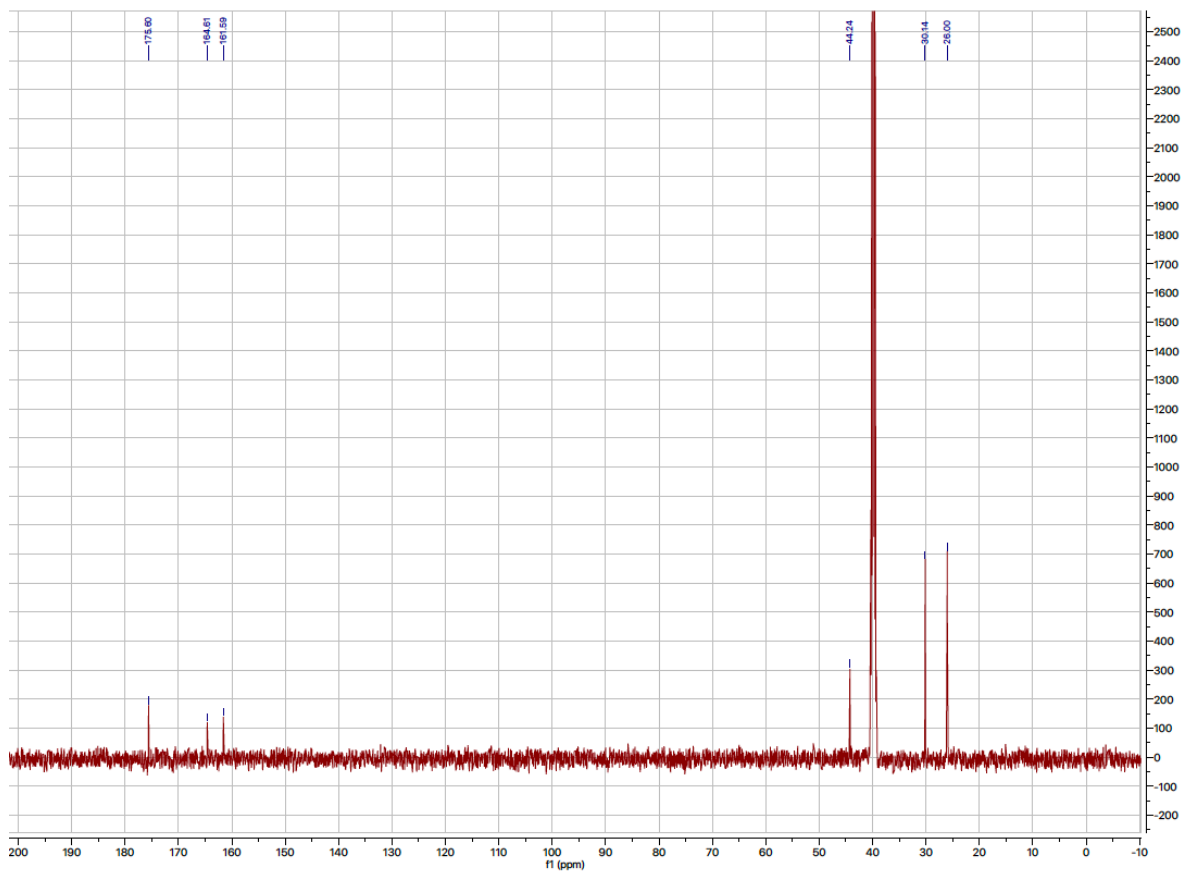

Compound 12  
 Mass Spectrum  
 MW = 276.0 g/mol

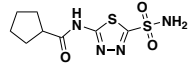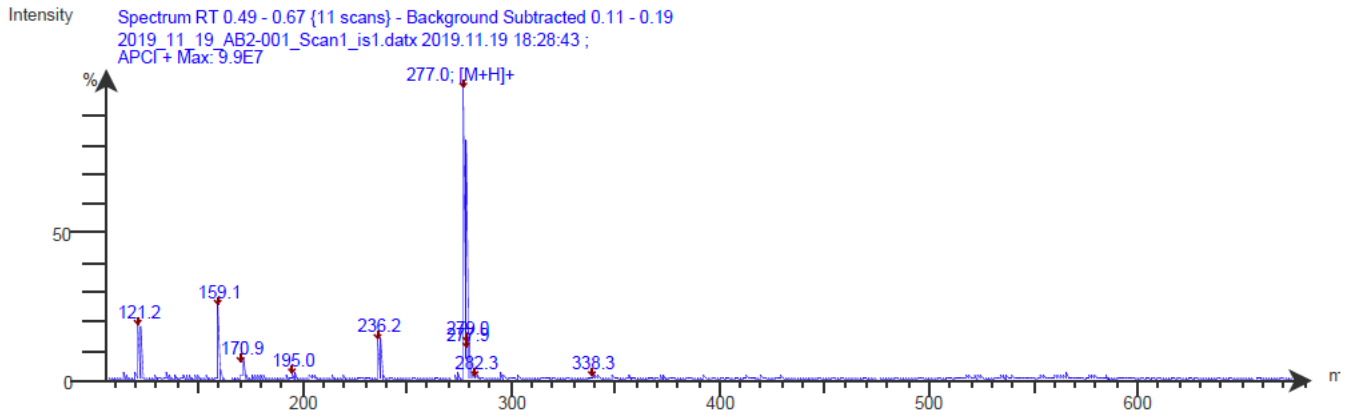

HPLC

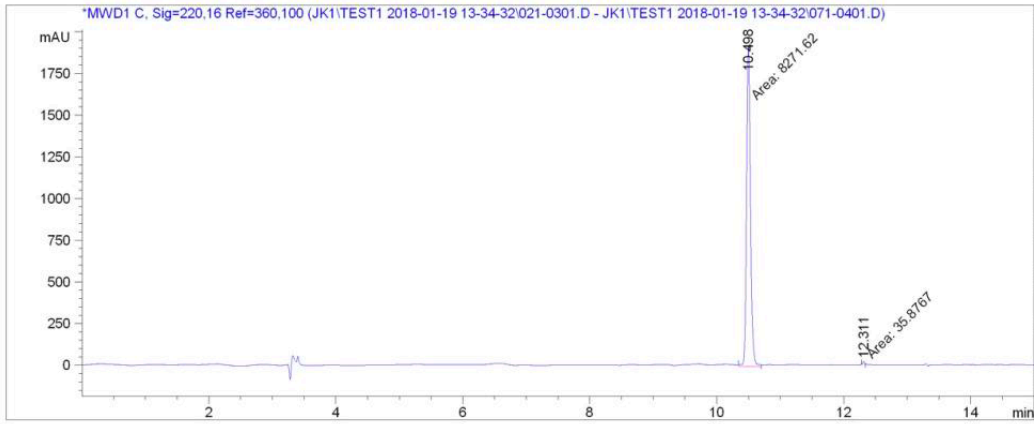

| Peak # | RetTime [min] | Type | Width [min] | Area [mAU*s] | Height [mAU] | Area %  |
|--------|---------------|------|-------------|--------------|--------------|---------|
| 1      | 10.498        | MM   | 0.0715      | 8271.61719   | 1927.22363   | 99.5681 |
| 2      | 12.311        | MM   | 0.0377      | 35.87666     | 15.88162     | 0.4319  |

Compound 13

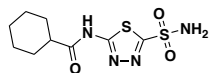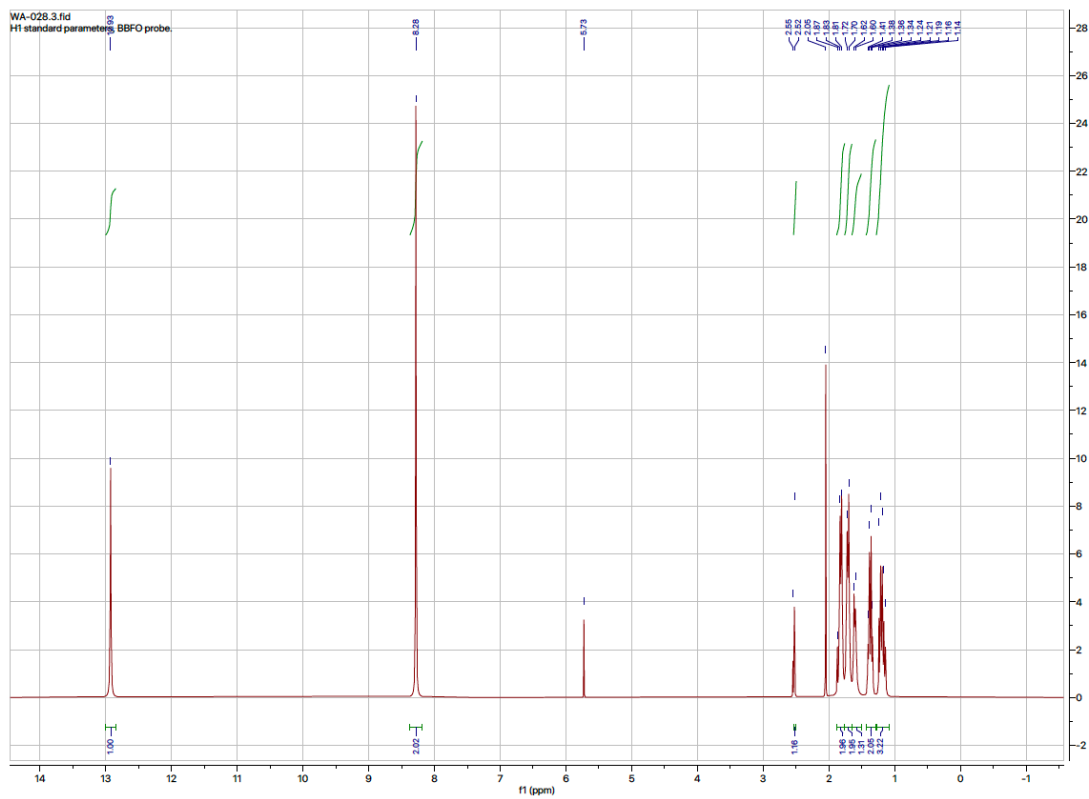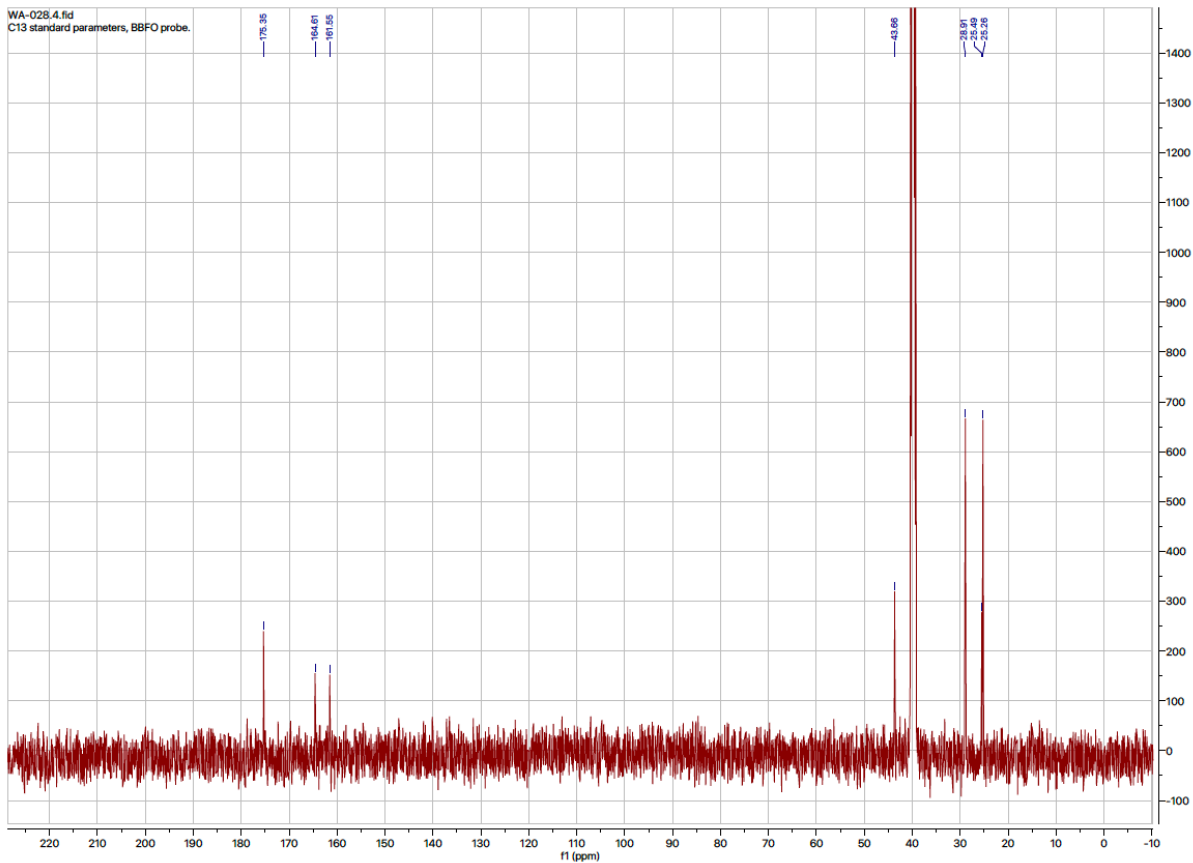

Compound 13  
Mass Spectrum  
MW = 290.0 g/mol

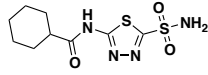

Spectrum RT 1.39 - 1.51 (8 scans)  
WA-028 2nd purification\_Scan1\_is1 2019.11.18 19:09:28 ;  
APCI + Max: 3E8

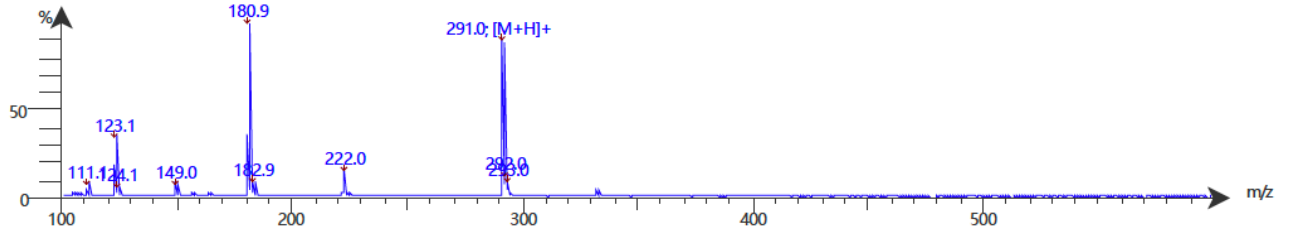

HPLC

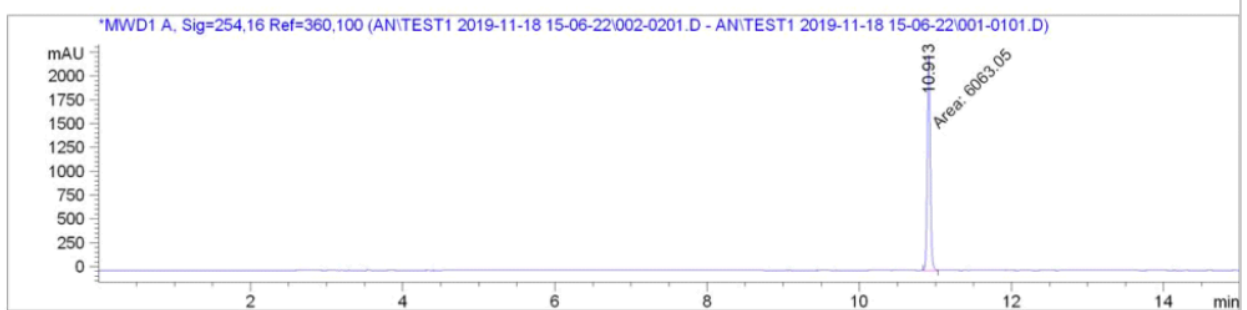

| Peak # | RetTime [min] | Type | Width [min] | Area [mAU*s] | Height [mAU] | Area %   |
|--------|---------------|------|-------------|--------------|--------------|----------|
| 1      | 10.913        | MM   | 0.0445      | 6063.04590   | 2270.67041   | 100.0000 |



# Compound 14

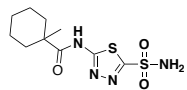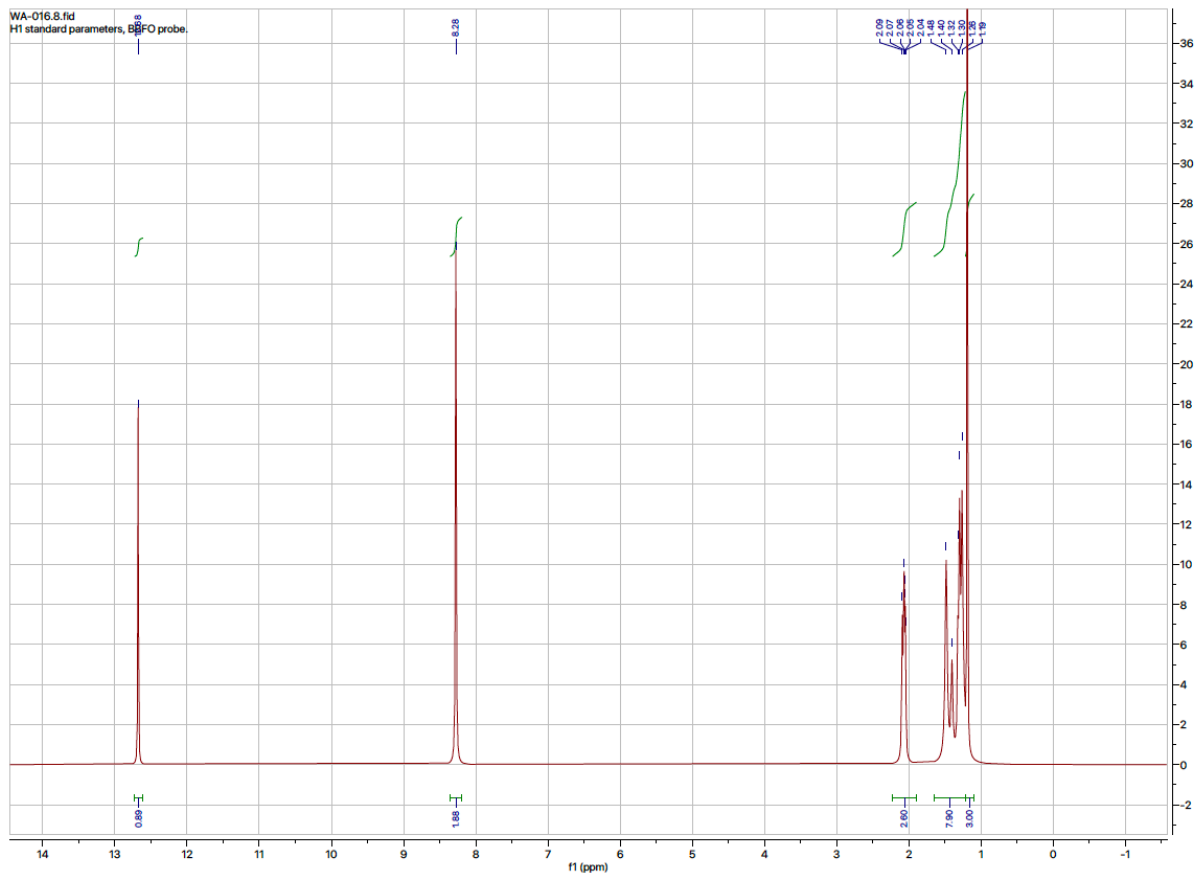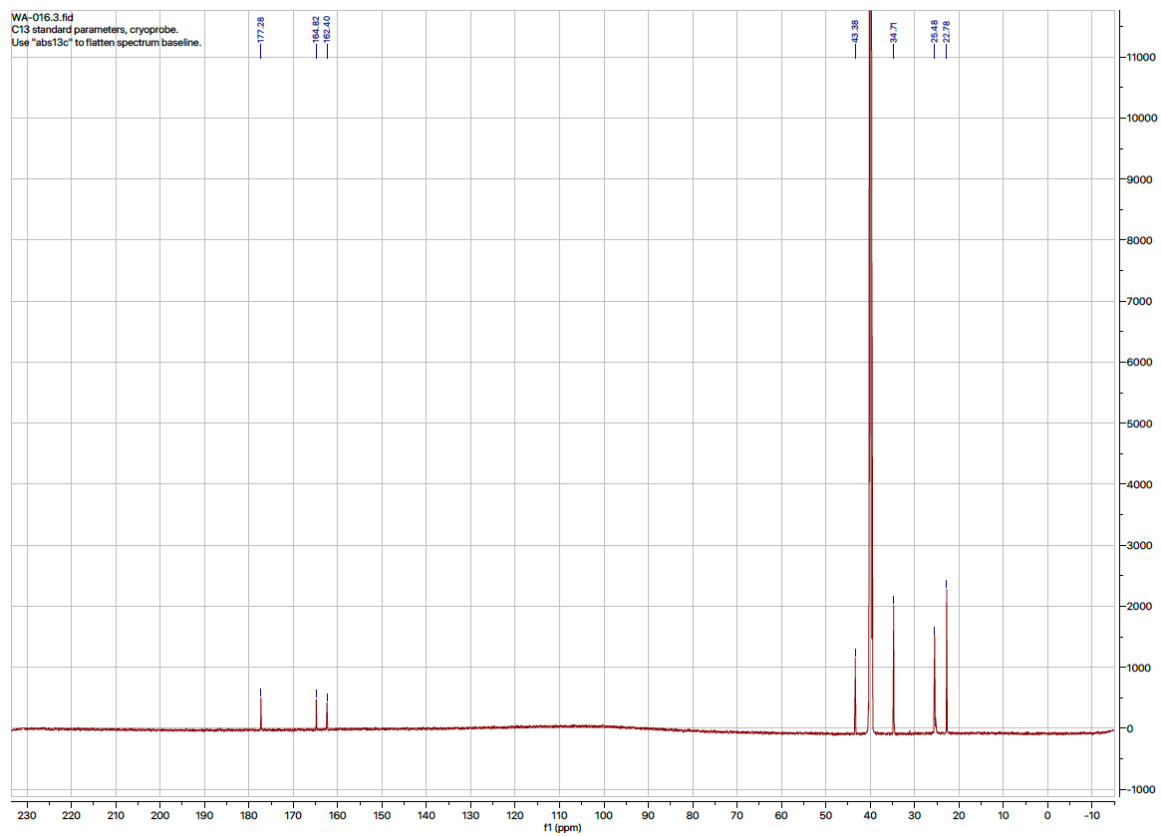

Compound 14  
 Mass Spectrum  
 MW = 304.0 g/mol

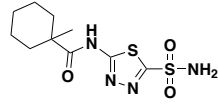

Spectrum RT 1.70 - 1.74 (3 scans)  
 2019\_11\_4\_17\_57\_43 WA016 Product\_Scan1\_is1 2019.11.04 17:58:15 ;  
 APCI+ Max: 1.6E8

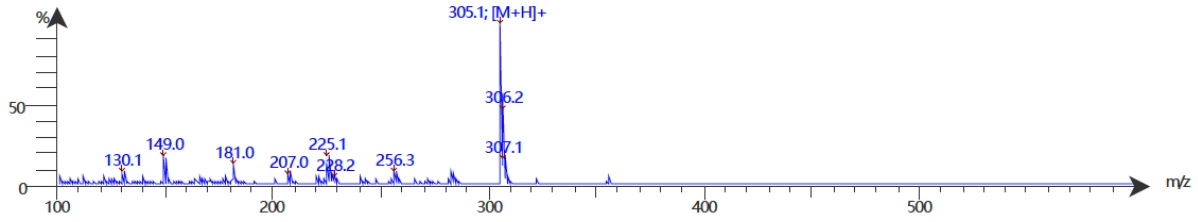

HPLC

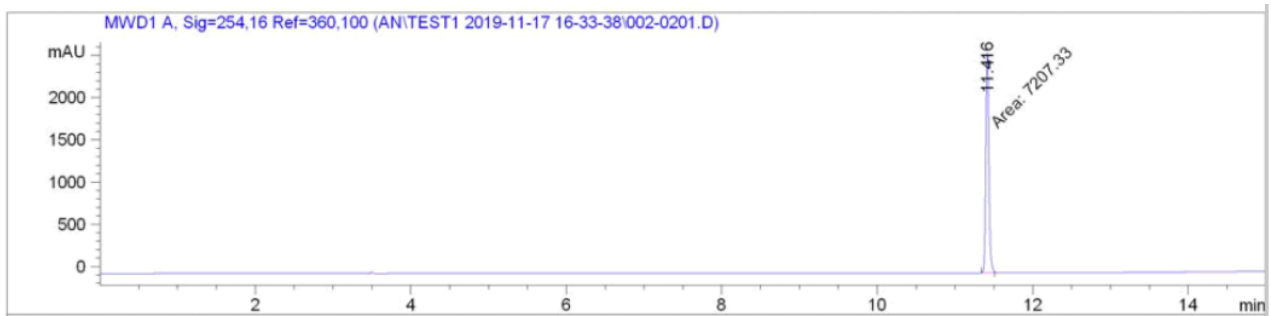

Signal 1: MWD1 A, Sig=254,16 Ref=360,100

| Peak # | RetTime [min] | Type | Width [min] | Area [mAU*s] | Height [mAU] | Area %   |
|--------|---------------|------|-------------|--------------|--------------|----------|
| 1      | 11.416        | MM   | 0.0460      | 7207.33252   | 2608.87769   | 100.0000 |

Totals : 7207.33252 2608.87769



Compound 15  
 Mass Spectrum  
 MW = 304.0 g/mol

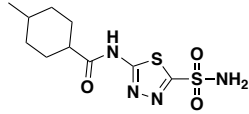

Spectrum RT 1.02 - 1.14 (8 scans) - Background Subtracted 0.47 - 0.61  
 WA017\_Scan1\_is1 2020.02.07 13:29:55;  
 APCI + Max: 1.3E9

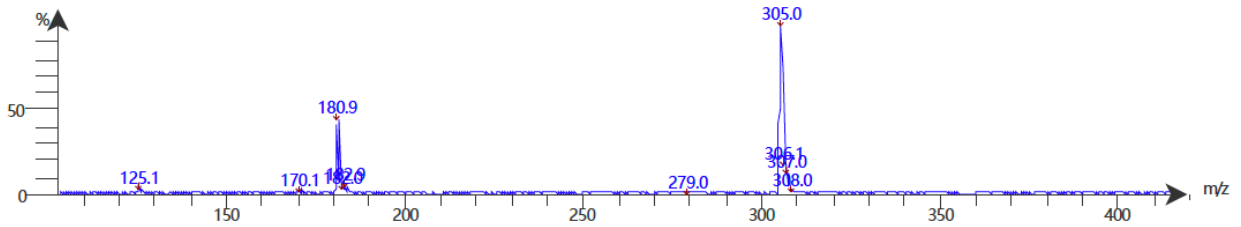

HPLC

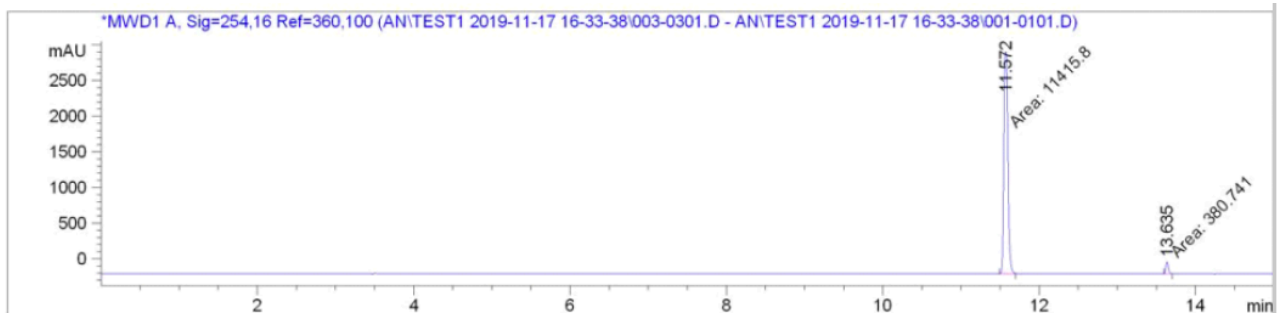

| Peak #   | RetTime [min] | Type | Width [min] | Area [mAU*s] | Height [mAU] | Area %  |
|----------|---------------|------|-------------|--------------|--------------|---------|
| 1        | 11.572        | MM   | 0.0612      | 1.14158e4    | 3110.40039   | 96.7724 |
| 2        | 13.635        | MM   | 0.0374      | 380.74075    | 169.56664    | 3.2276  |
| Totals : |               |      |             | 1.17965e4    | 3279.96703   |         |

Compound 16

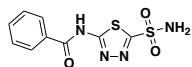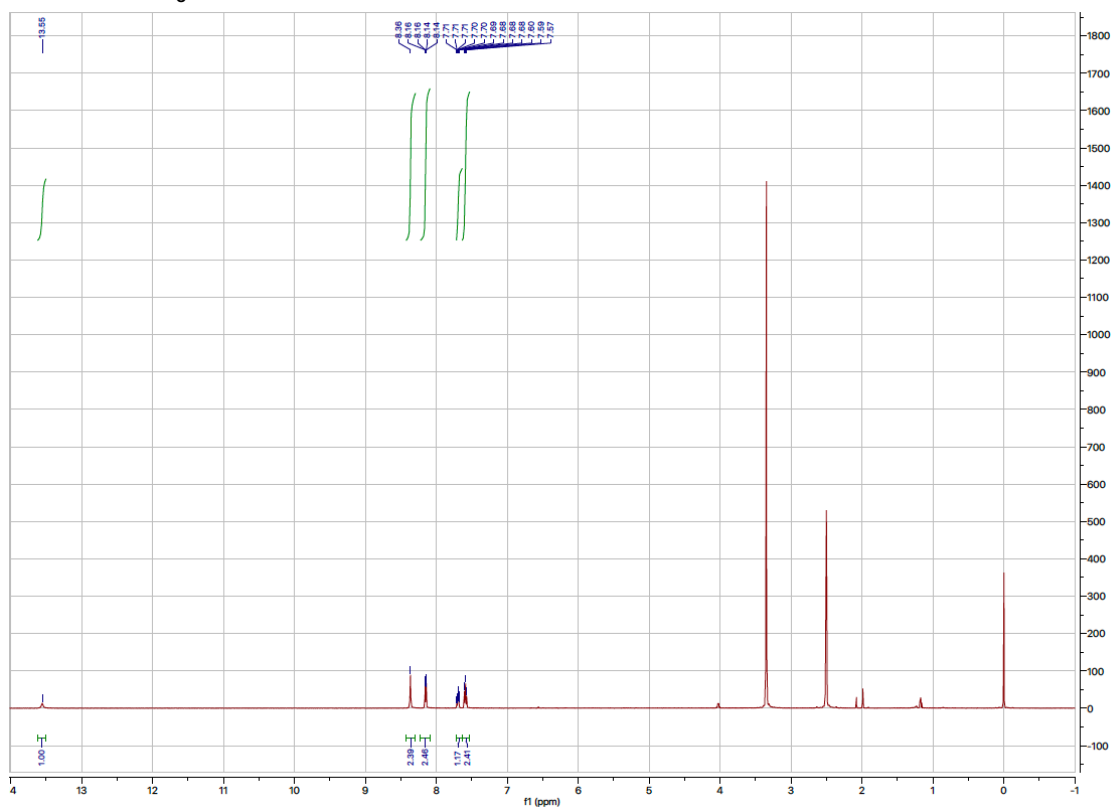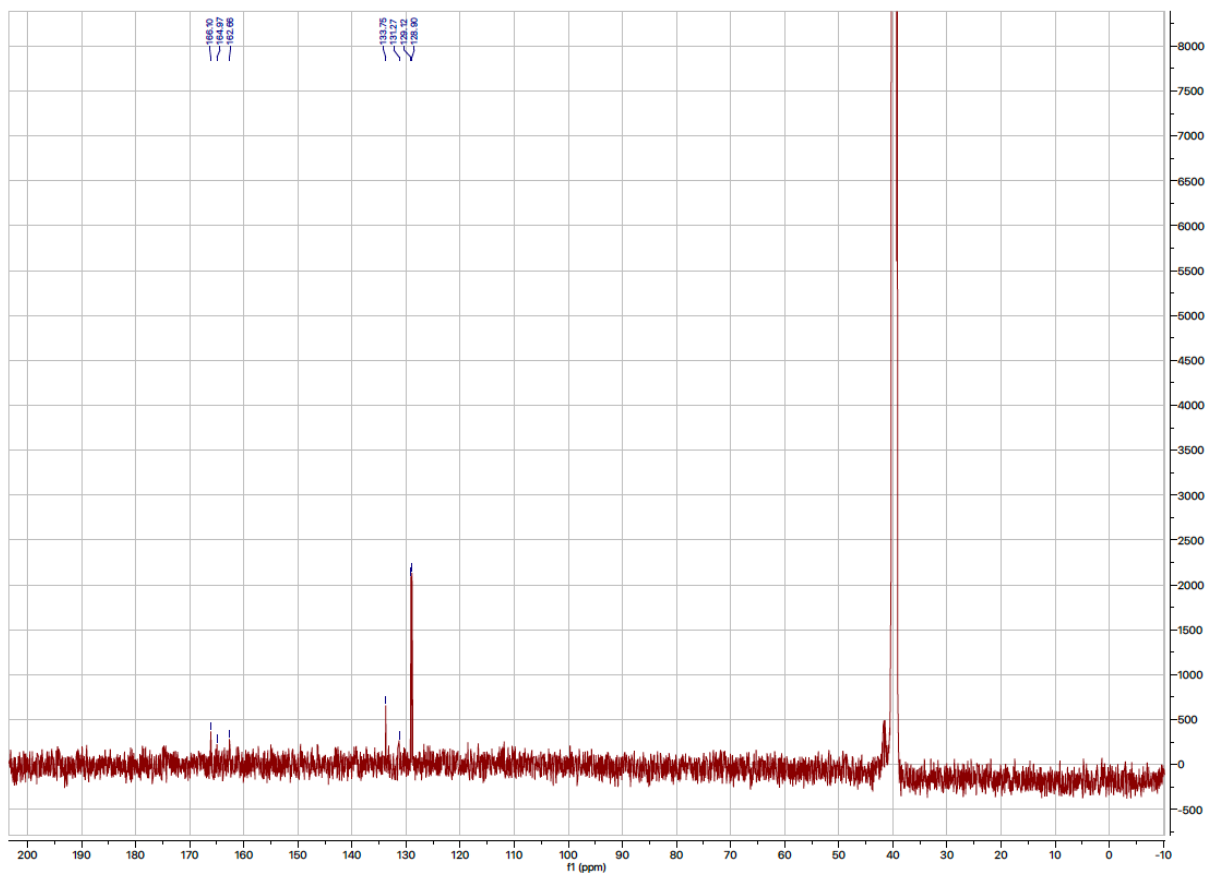

Compound 16  
Mass Spectrum  
MW = 284.0 g/mol

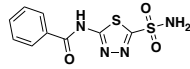

Spectrum RT 0.70 - 0.81 (7 scans) - Background Subtracted 0.44 - 0.61  
AS-005B\_Scan1\_is1.datx 2018.10.23 10:04:52 ;  
Intensity APCI + Max: 1.7E8

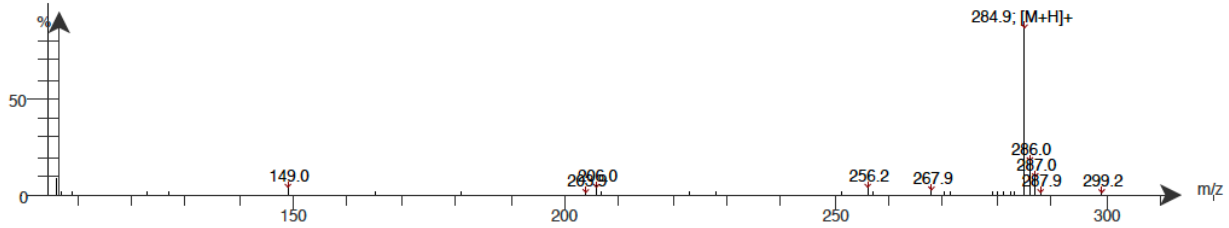

### HPLC

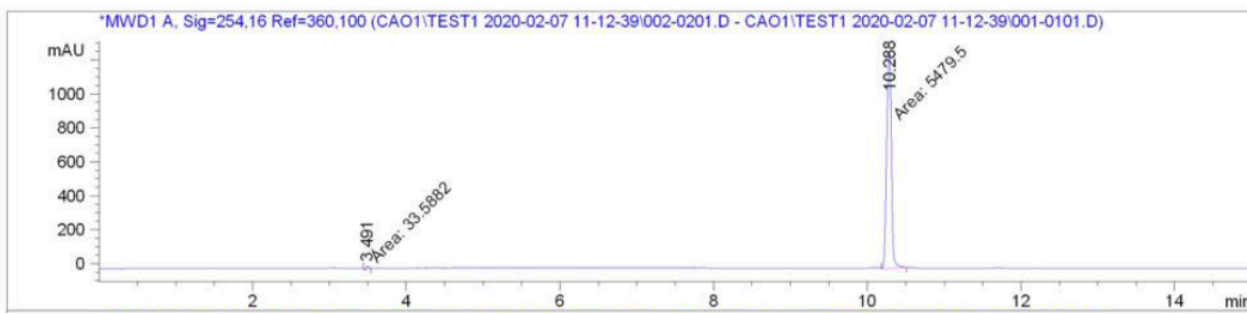

| Peak # | RetTime [min] | Type | Width [min] | Area [mAU*s] | Height [mAU] | Area %  |
|--------|---------------|------|-------------|--------------|--------------|---------|
| 1      | 3.491         | MM   | 0.0432      | 33.58823     | 12.95092     | 0.6092  |
| 2      | 10.288        | MM   | 0.0715      | 5479.50342   | 1276.92065   | 99.3908 |

Totals : 5513.09164 1289.87157

Compound 17

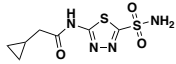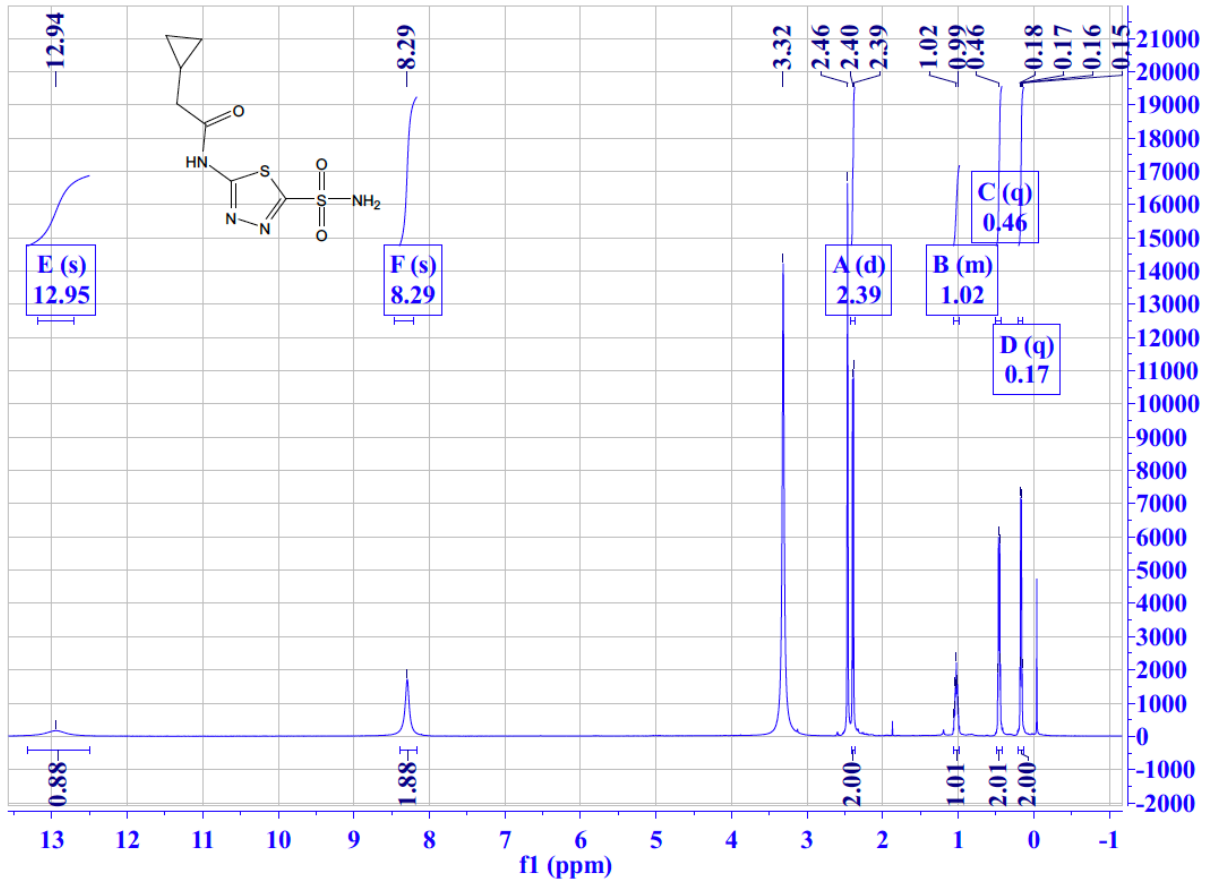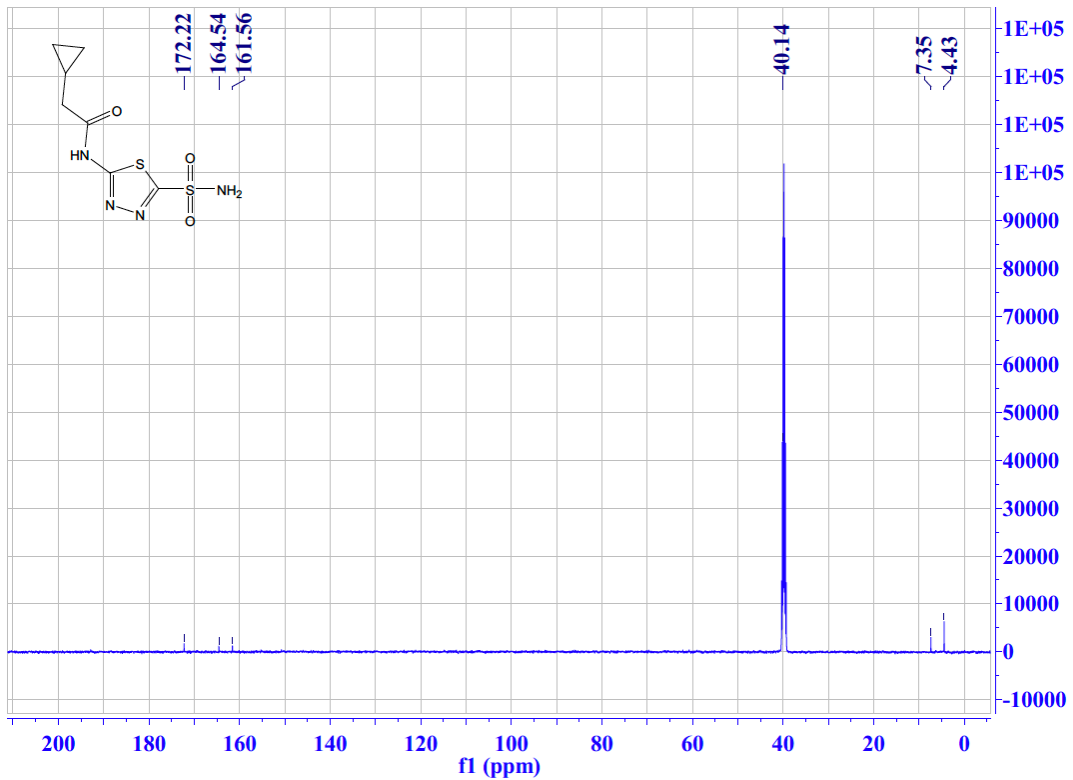

Compound 17  
Mass Spectrum

MW = 262.0 g/mol

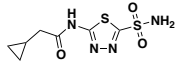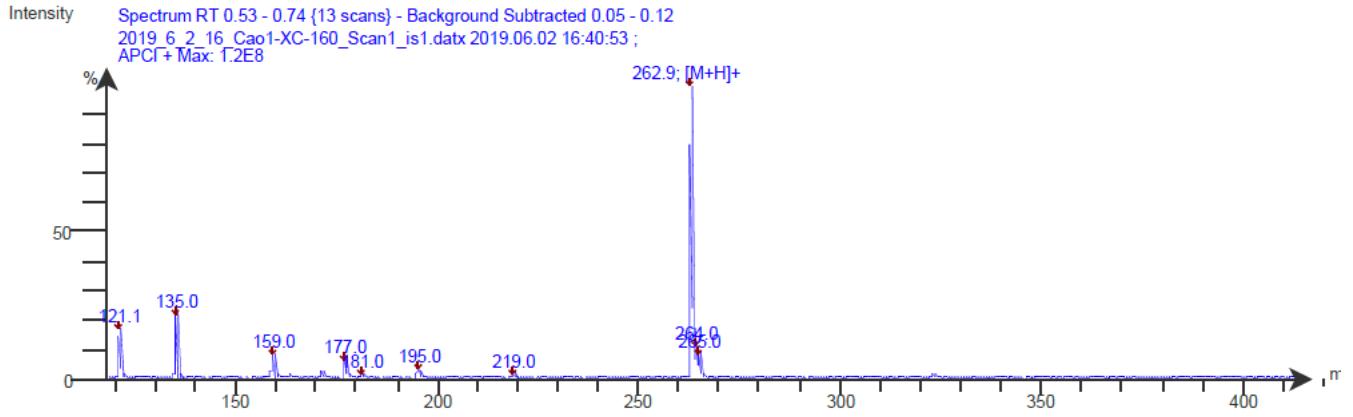

HPLC

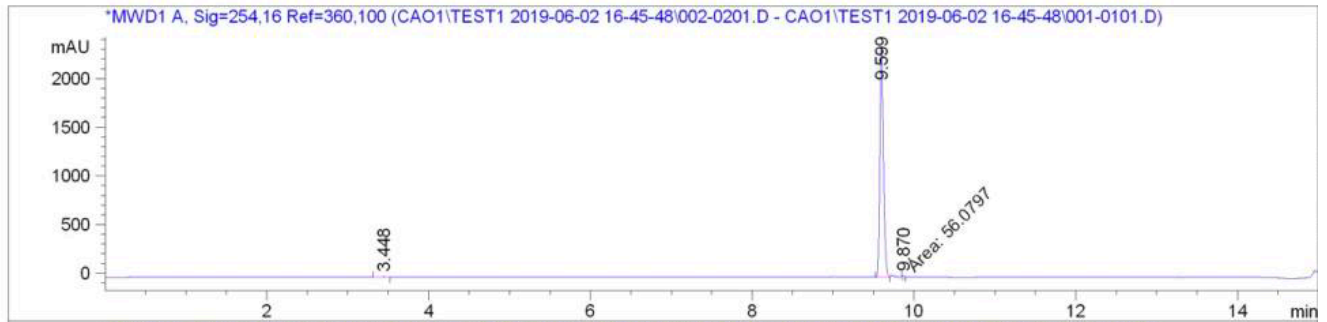

| Peak # | RetTime [min] | Type | Width [min] | Area [mAU*s] | Height [mAU] | Area %  |
|--------|---------------|------|-------------|--------------|--------------|---------|
| 1      | 3.448         | VV   | 0.0518      | 11.15211     | 2.84341      | 0.1571  |
| 2      | 9.599         | VV   | 0.0447      | 7030.23828   | 2364.56885   | 99.0527 |
| 3      | 9.870         | MM   | 0.0314      | 56.07973     | 29.75411     | 0.7901  |



Compound 18

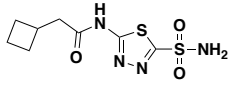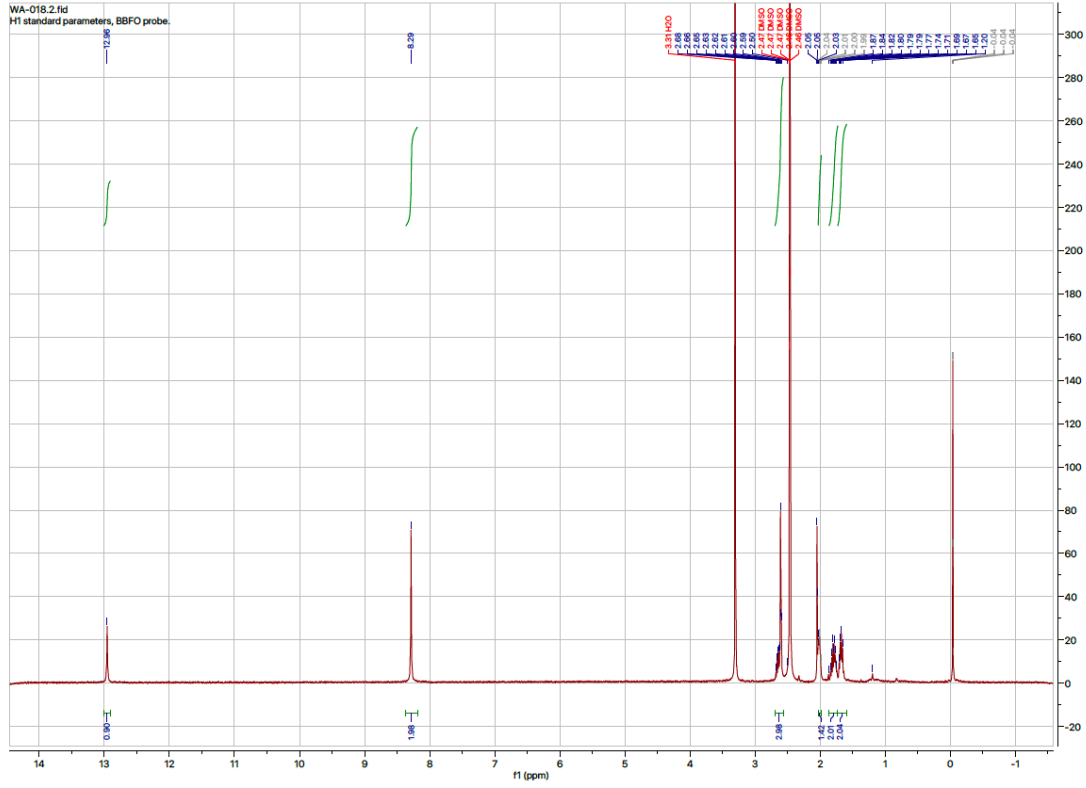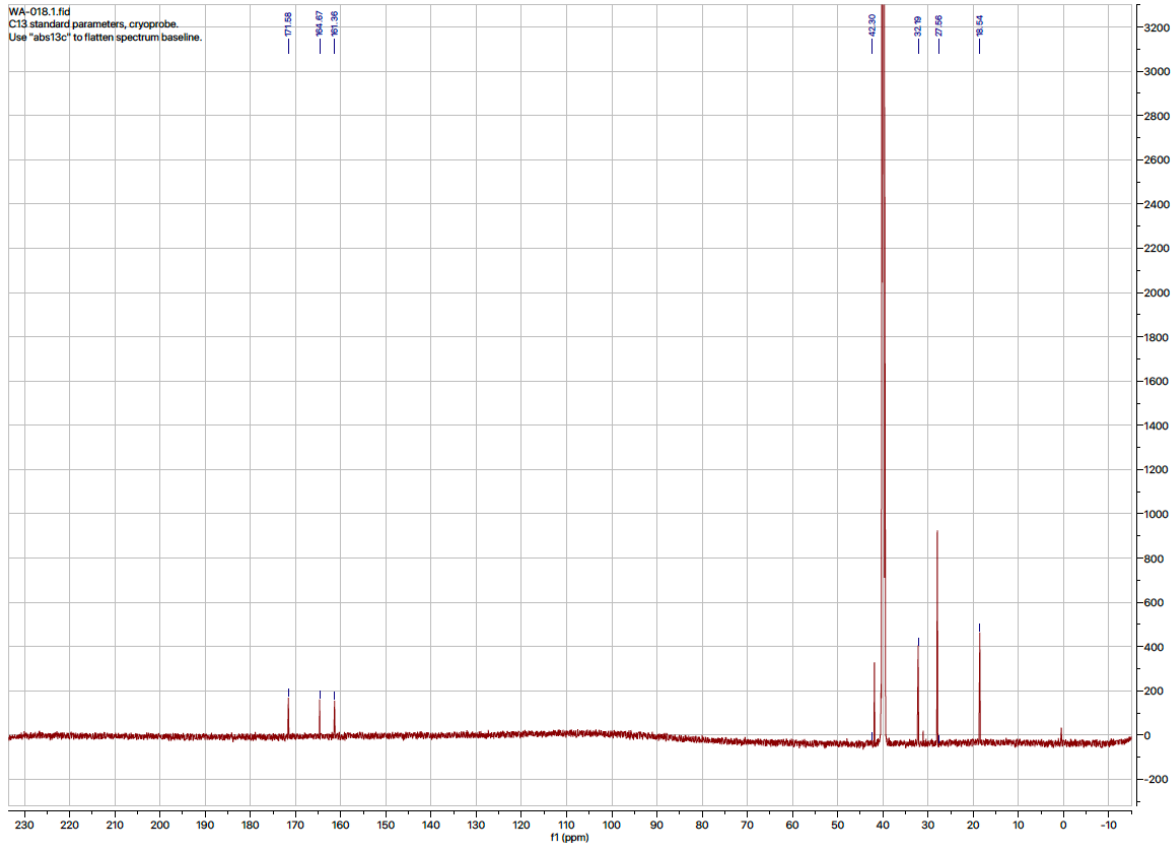

Compound 18  
 Mass Spectrum  
 MW = 276.0 g/mol

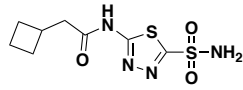

Spectrum RT 1.12 - 1.21 (6 scans)  
 WA018 Scan1\_is1 2019.11.08 16:25:33 ;  
 APCI + Max: 1.9E9

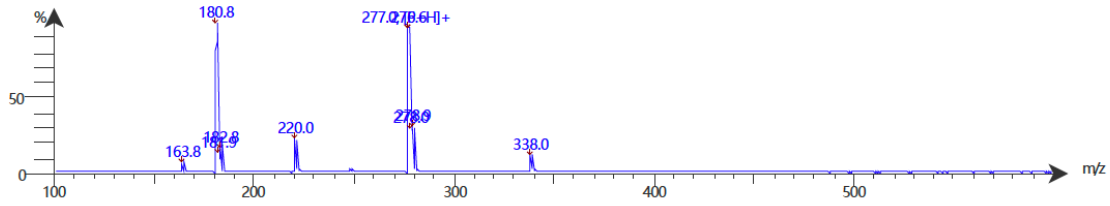

HPLC

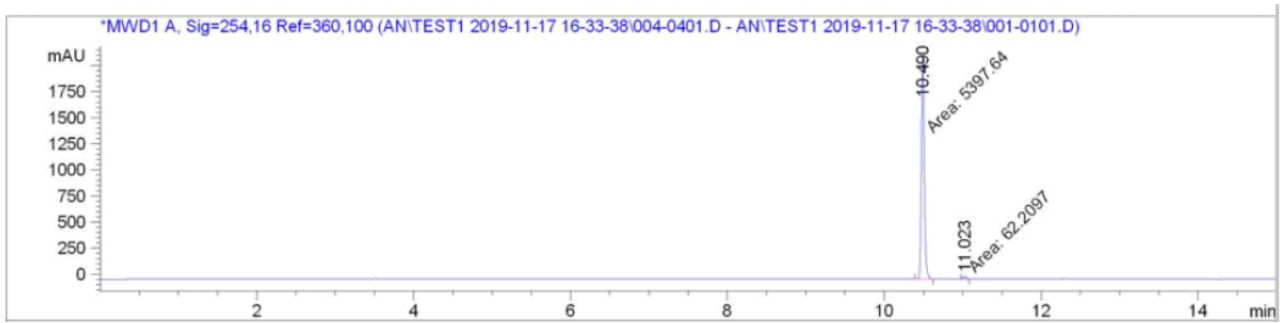

| Peak # | RetTime [min] | Type | Width [min] | Area [mAU*s] | Height [mAU] | Area %  |
|--------|---------------|------|-------------|--------------|--------------|---------|
| 1      | 10.490        | MM   | 0.0421      | 5397.64258   | 2135.76855   | 98.8606 |
| 2      | 11.023        | MM   | 0.0430      | 62.20968     | 24.11418     | 1.1394  |

Totals : 5459.85226 2159.88274

Compound 19

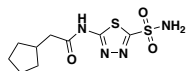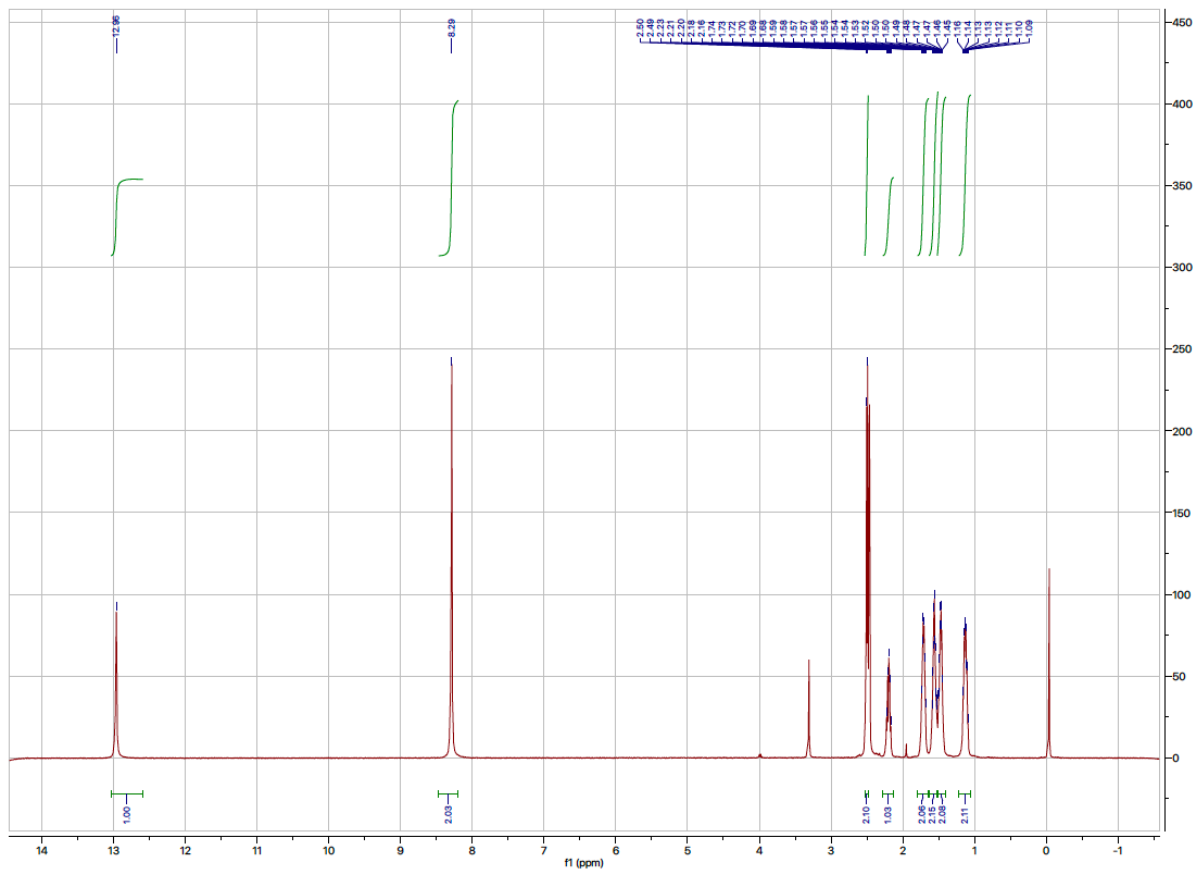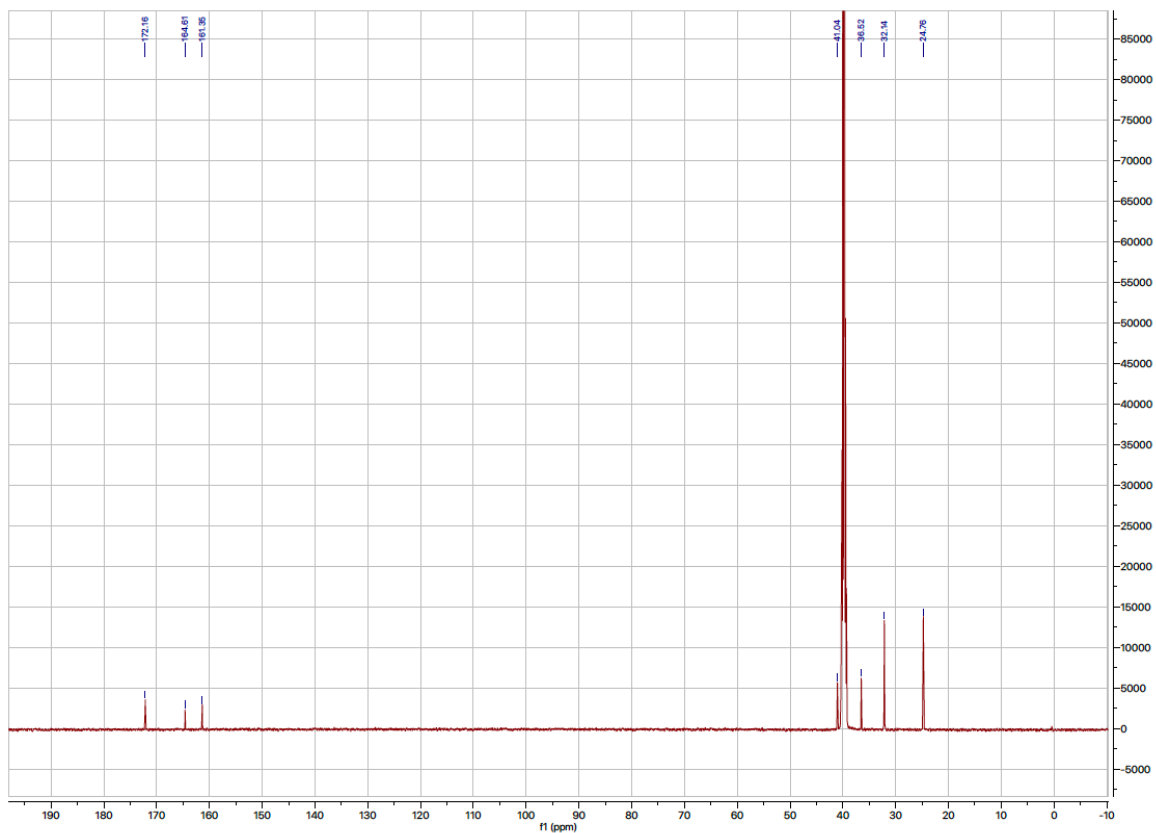

Compound 19  
 Mass Spectrum  
 MW = 290.0 g/mol

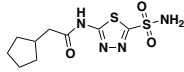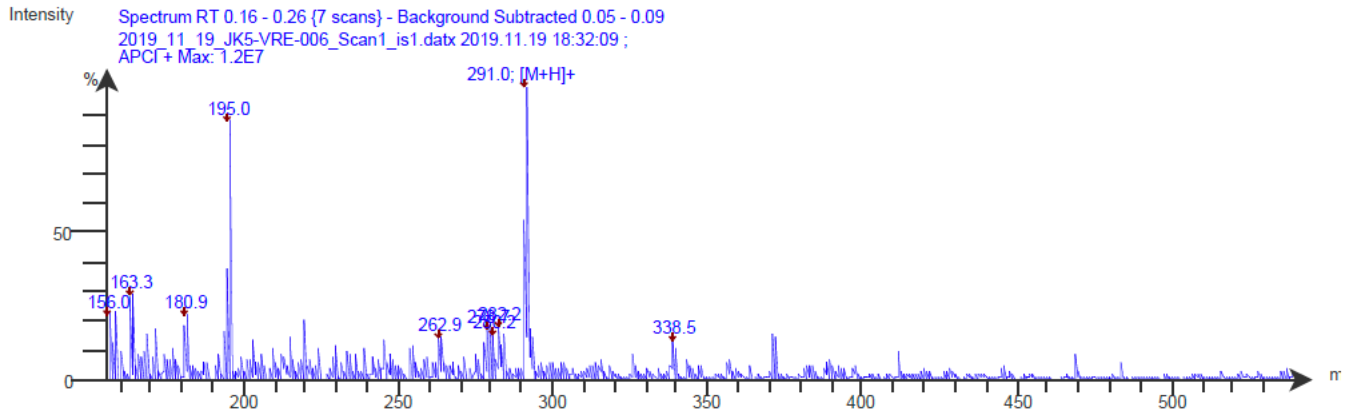

HPLC

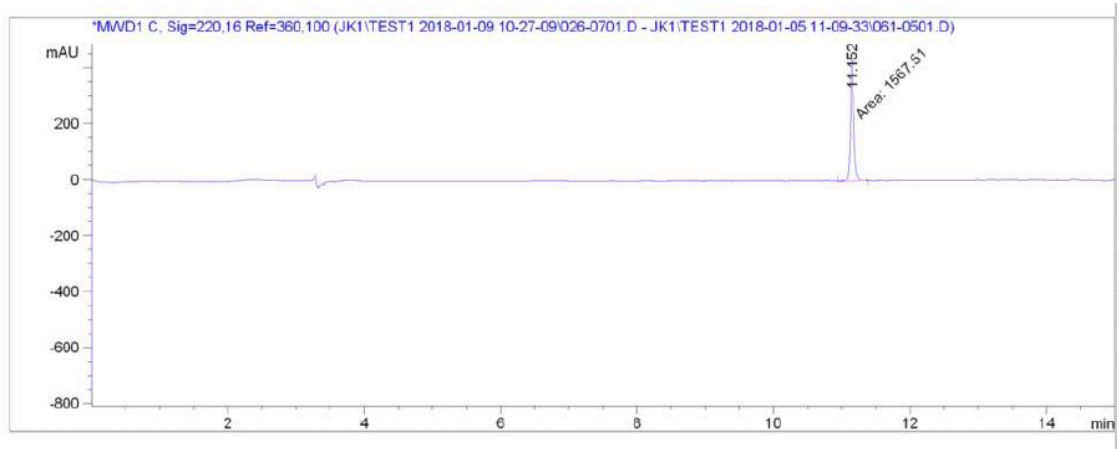

| Peak # | RetTime [min] | Type | Width [min] | Area [mAU*s] | Height [mAU] | Area %   |
|--------|---------------|------|-------------|--------------|--------------|----------|
| 1      | 11.152        | MM   | 0.0602      | 1567.51111   | 434.06131    | 100.0000 |

Compound 20  
DMSO-d6

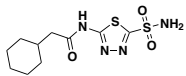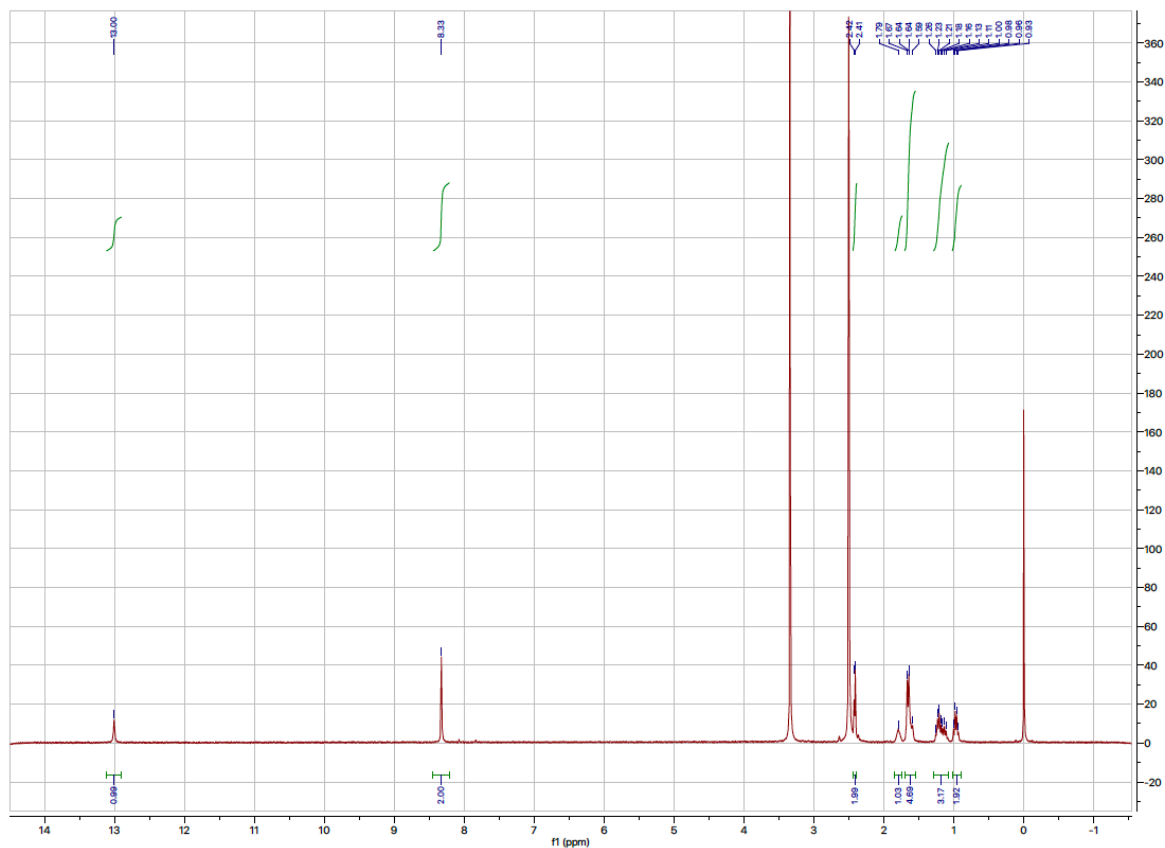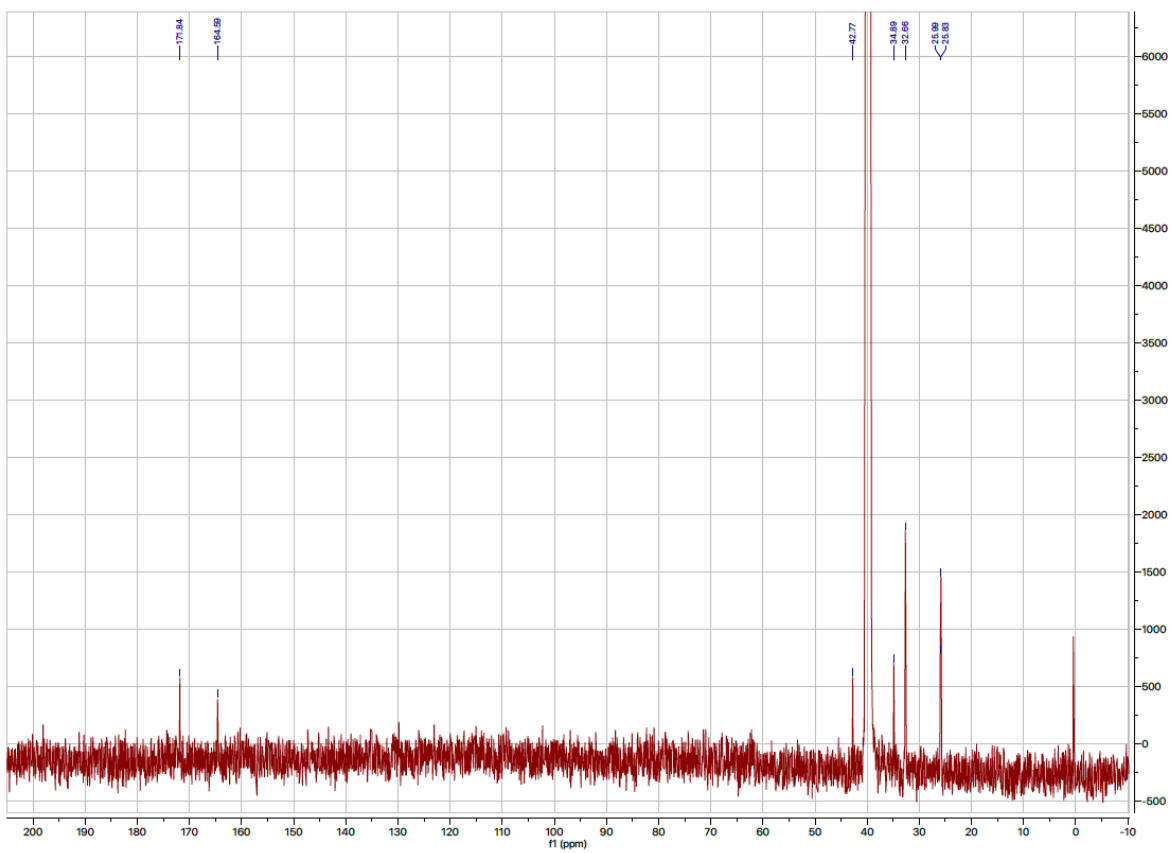

Compound 20  
MeOD-d4

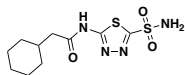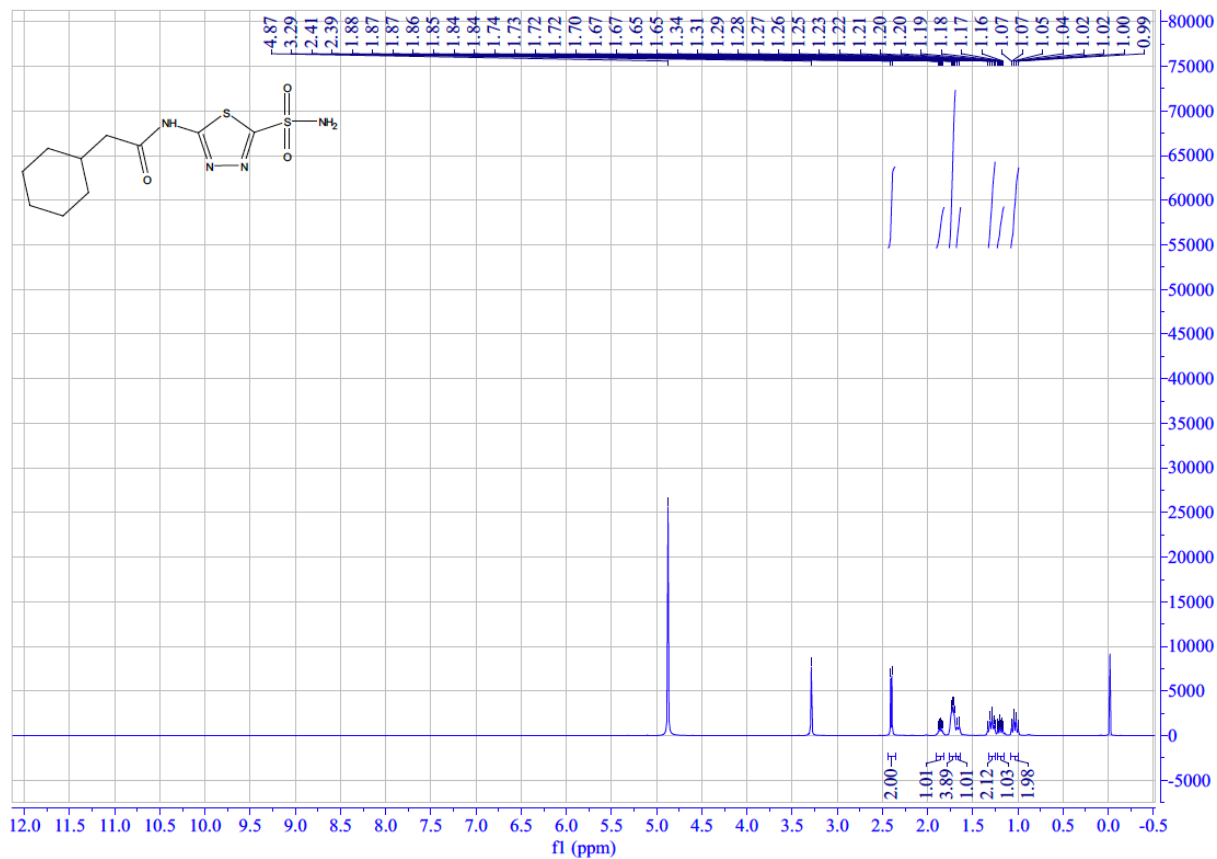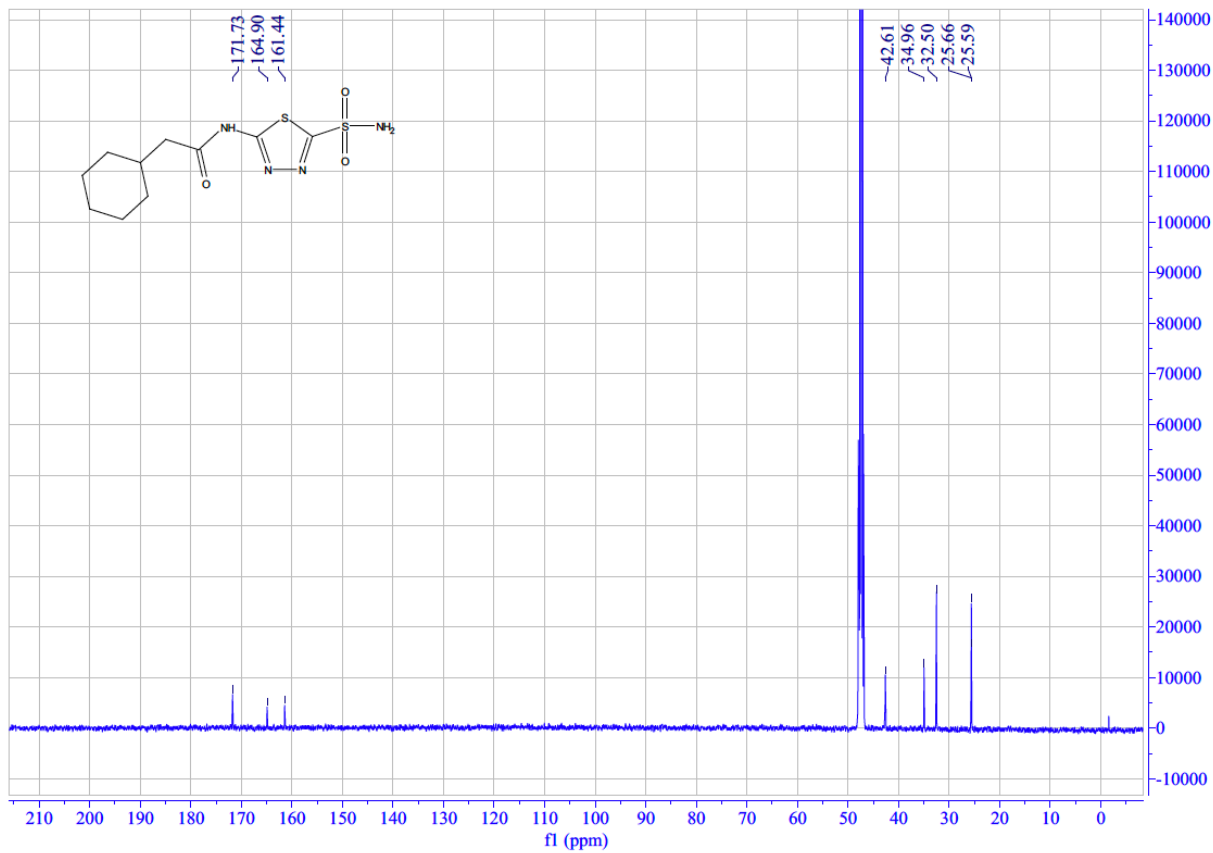

Compound 20  
 Mass Spectrum  
 MW = 304.1 g/mol

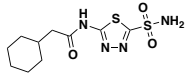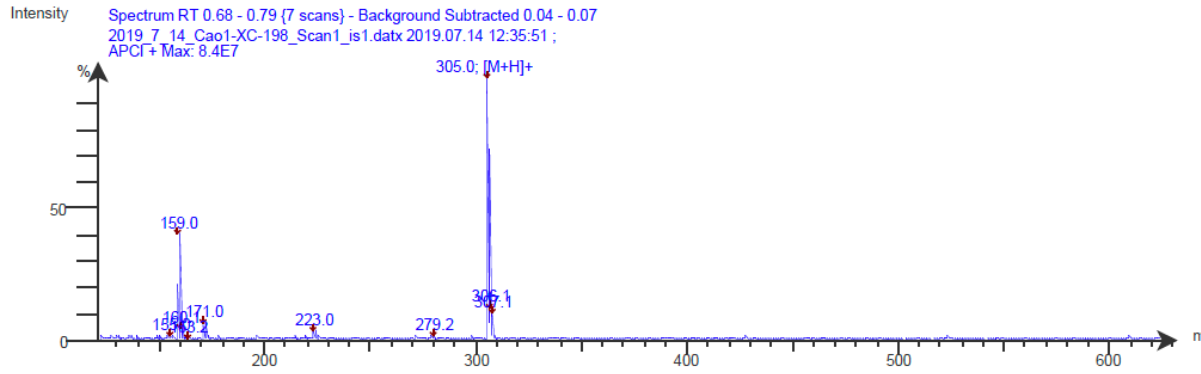

HPLC

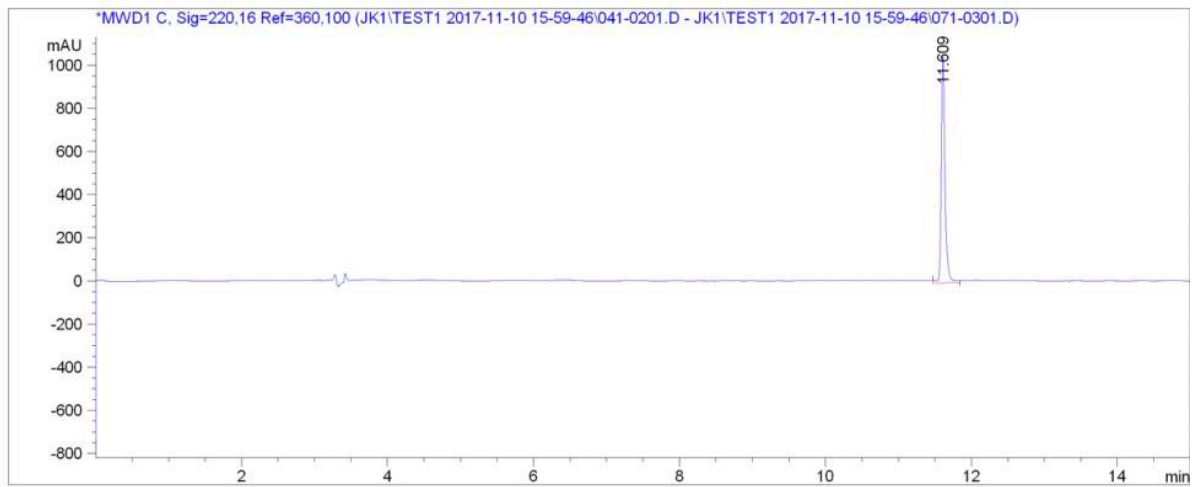

| Peak # | RetTime [min] | Type | Width [min] | Area [mAU*s] | Height [mAU] | Area %   |
|--------|---------------|------|-------------|--------------|--------------|----------|
| 1      | 11.609        | VV   | 0.0519      | 3701.54443   | 1056.79163   | 100.0000 |

Compound 21

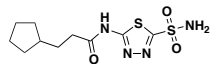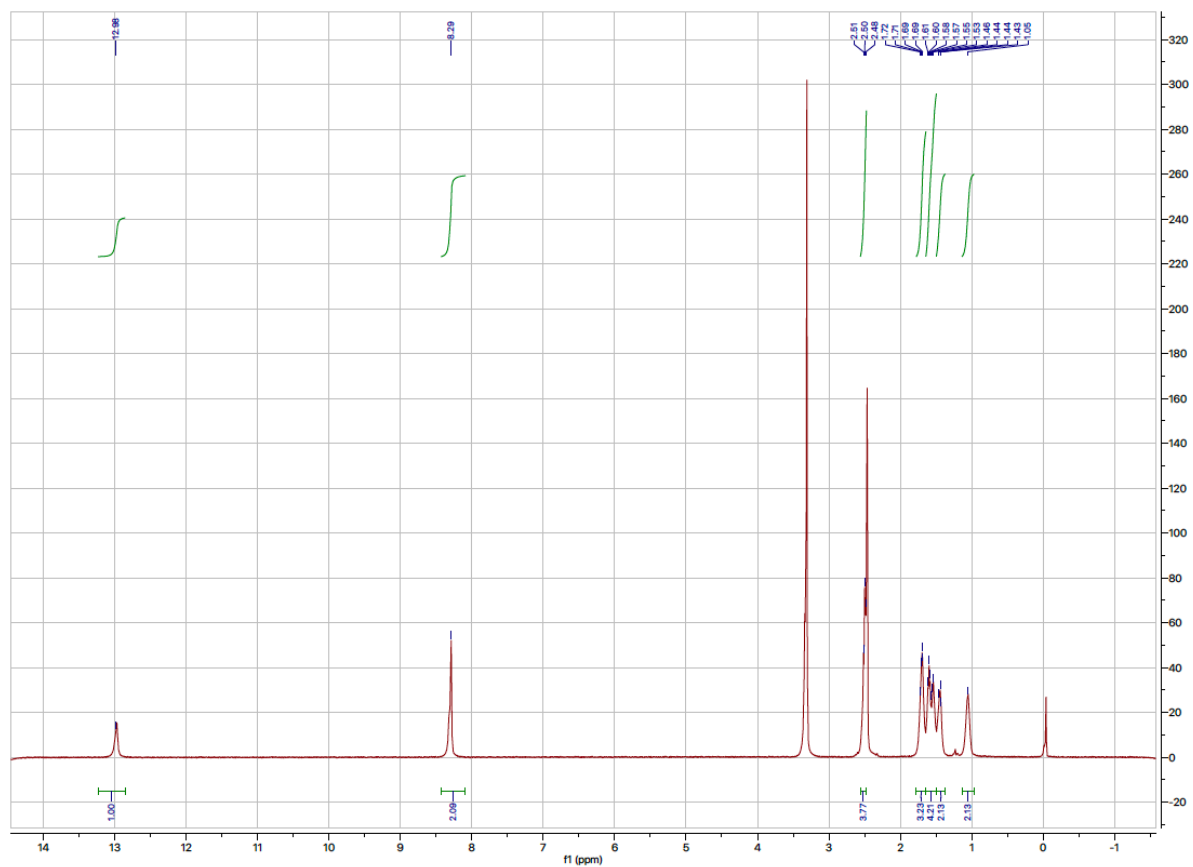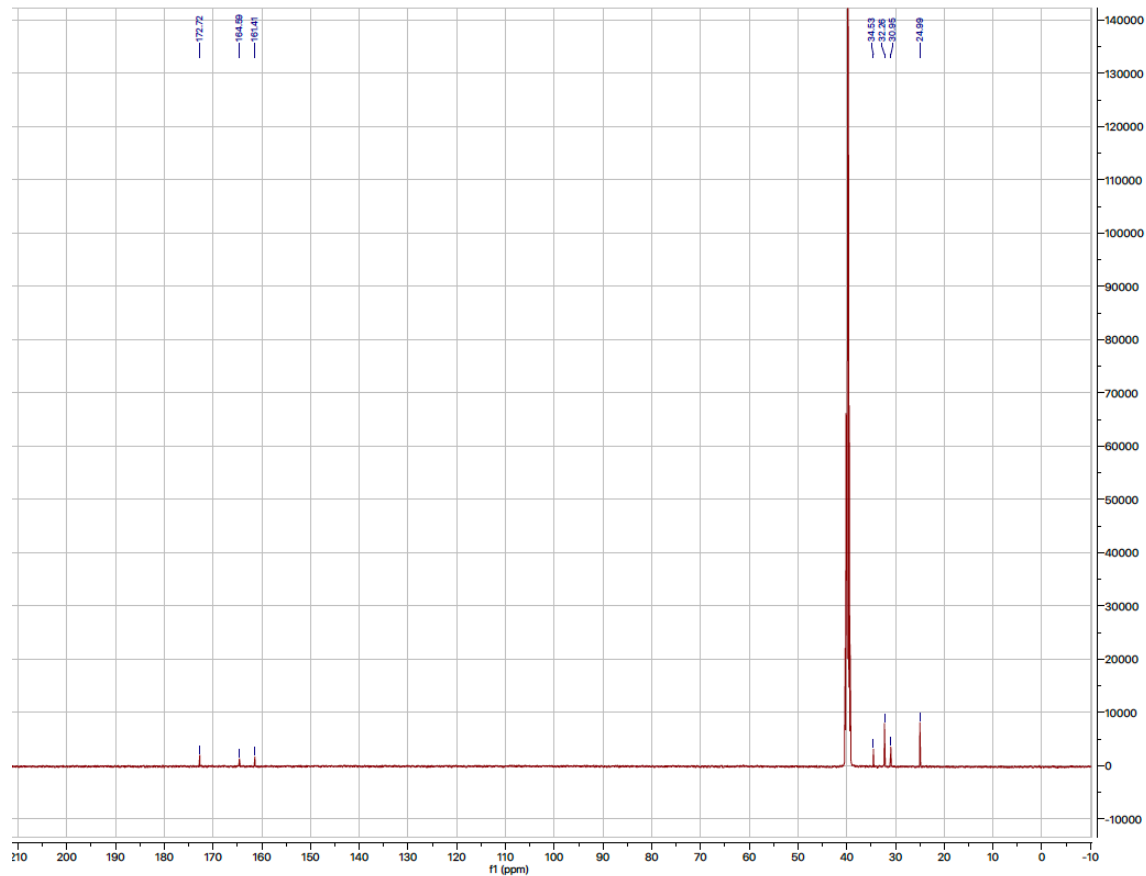



Compound 21  
Mass Spectrum  
MW = 304.1 g/mol

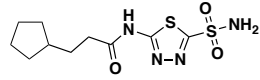

Spectrum RT 0.70 - 0.75 (4 scans) - Background Subtracted 0.33 - 0.60  
AS-005H\_Scan1\_1st.dab 2018.10.23 10:13:38 ;  
APCI + Max: 4.7E8

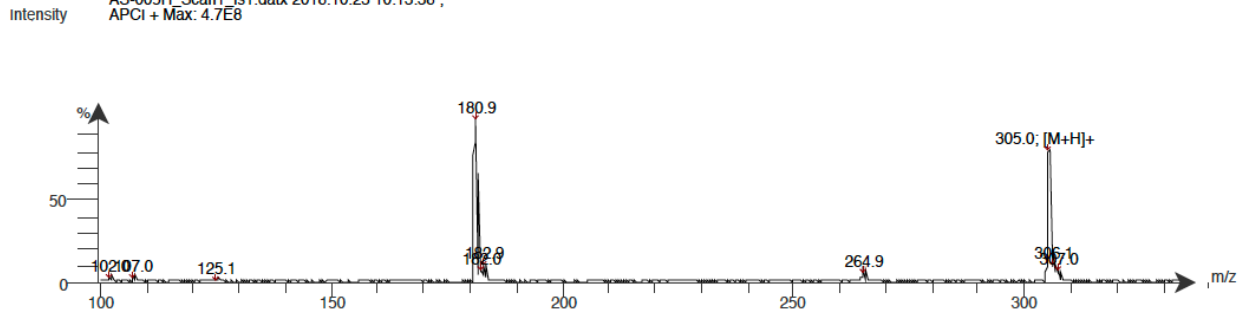

HPLC

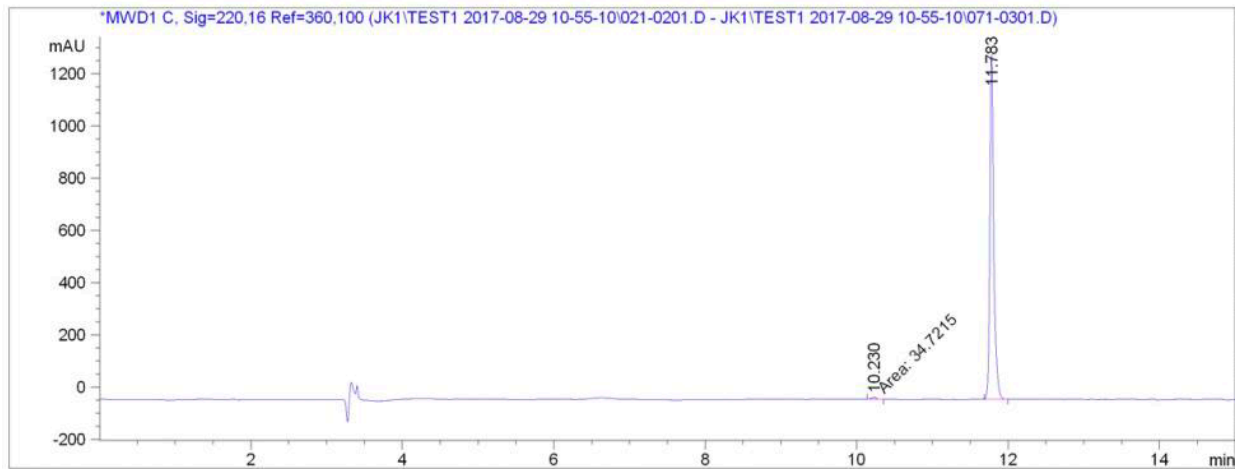

| Peak # | RetTime [min] | Type | Width [min] | Area [mAU*s] | Height [mAU] | Area %  |
|--------|---------------|------|-------------|--------------|--------------|---------|
| 1      | 10.230        | MM   | 0.0741      | 34.72152     | 7.81315      | 0.7333  |
| 2      | 11.783        | BB   | 0.0537      | 4700.41943   | 1314.10718   | 99.2667 |

Compound 22  
DMSO-d6

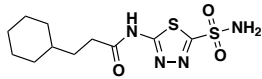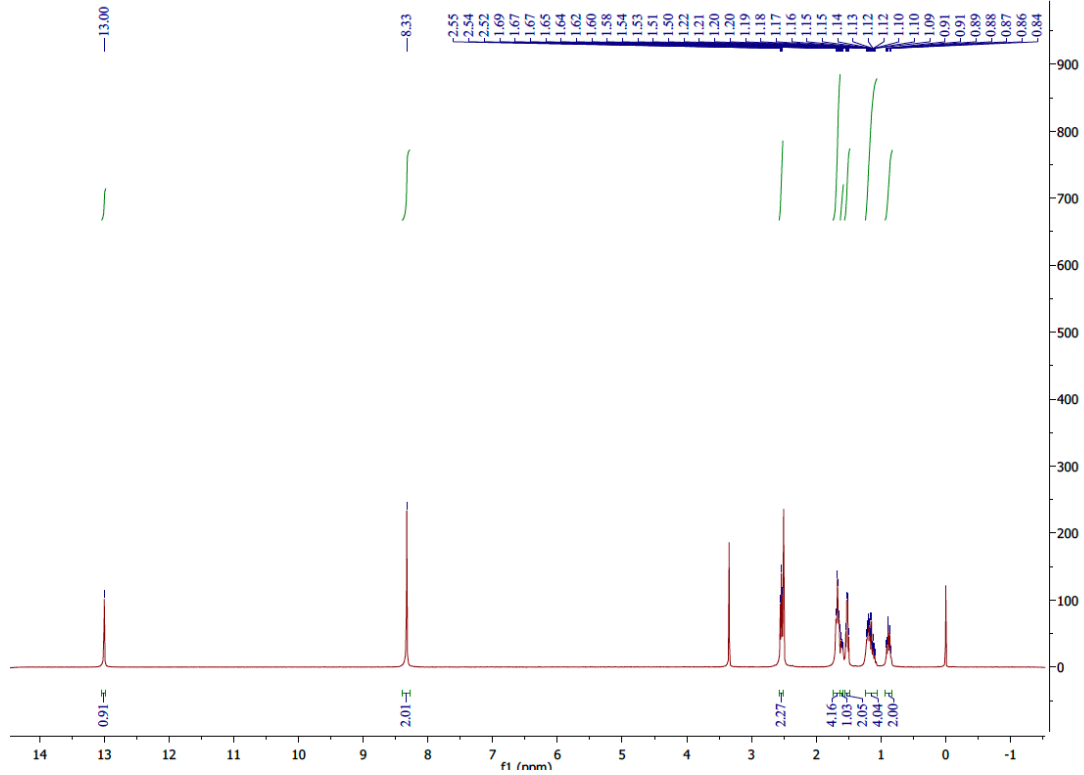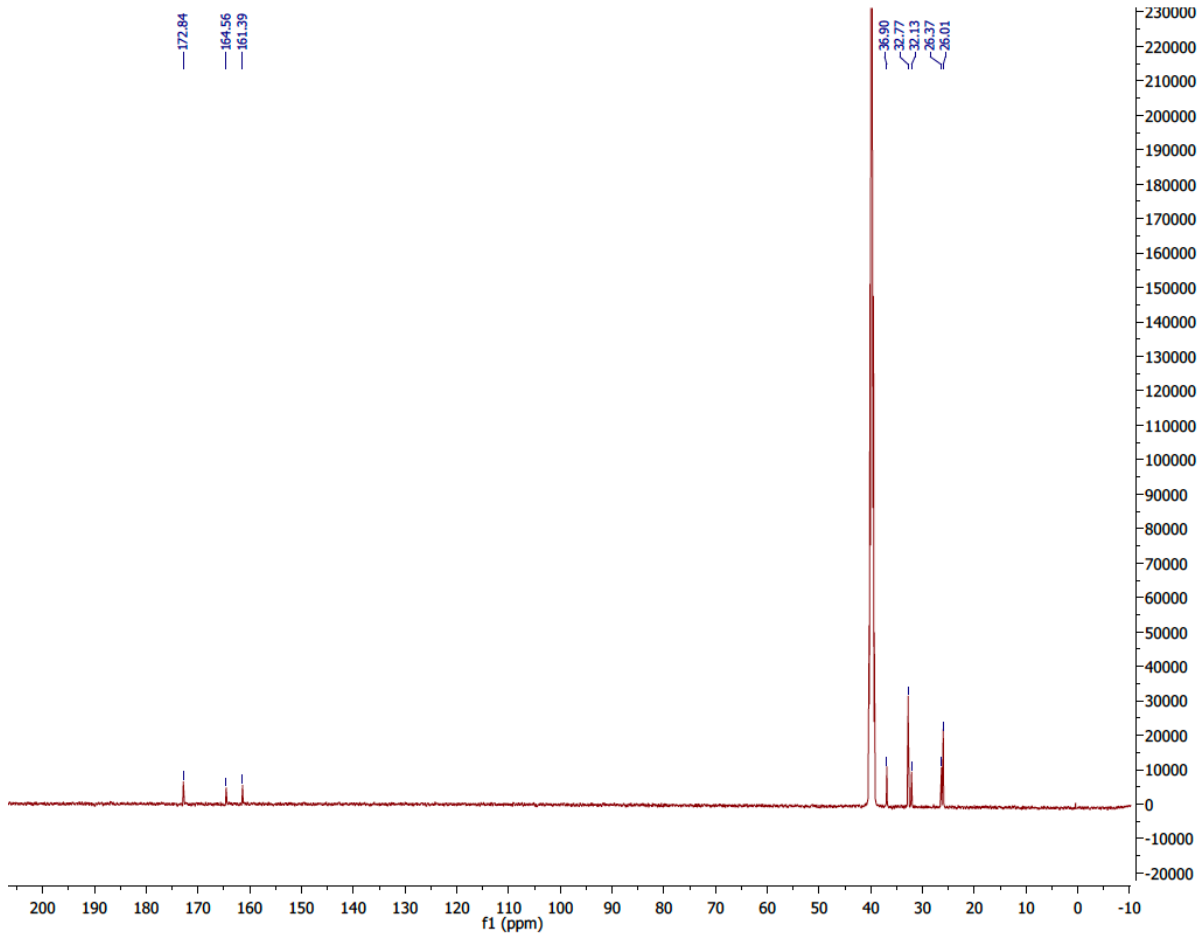

Compound 22  
MeOD-d4

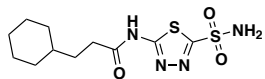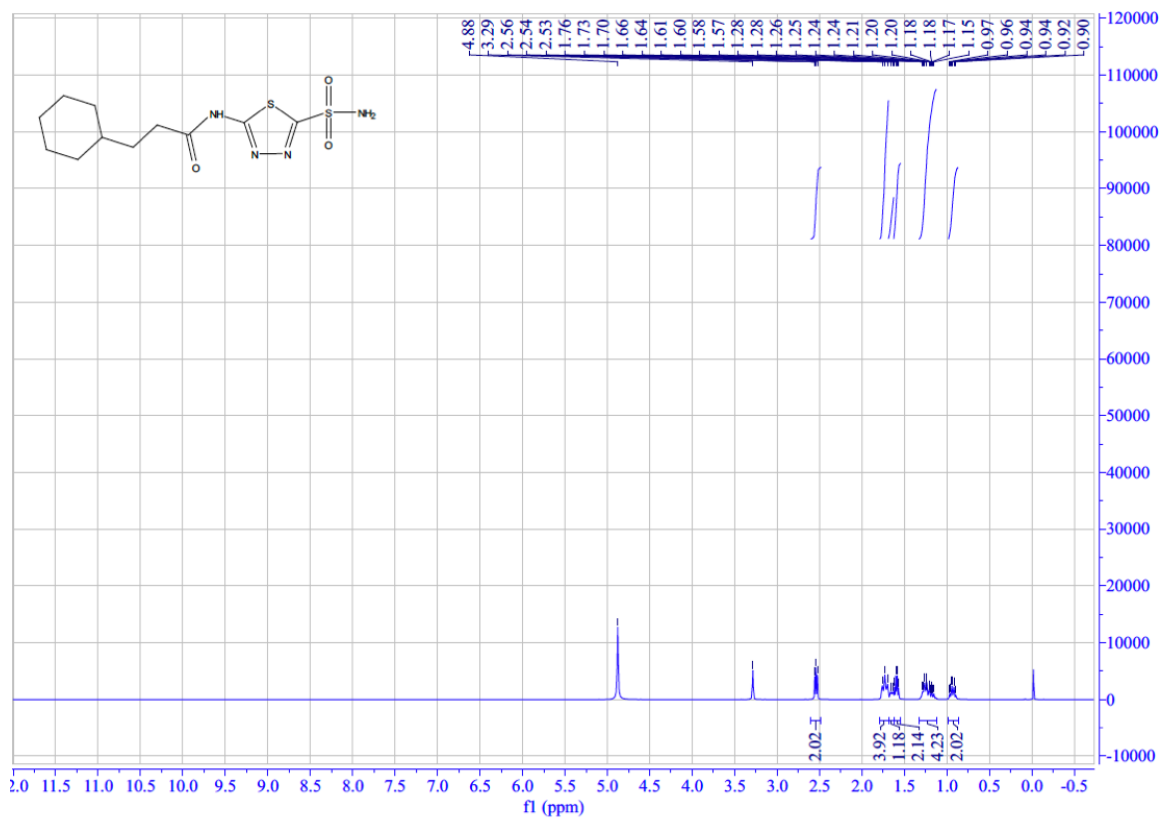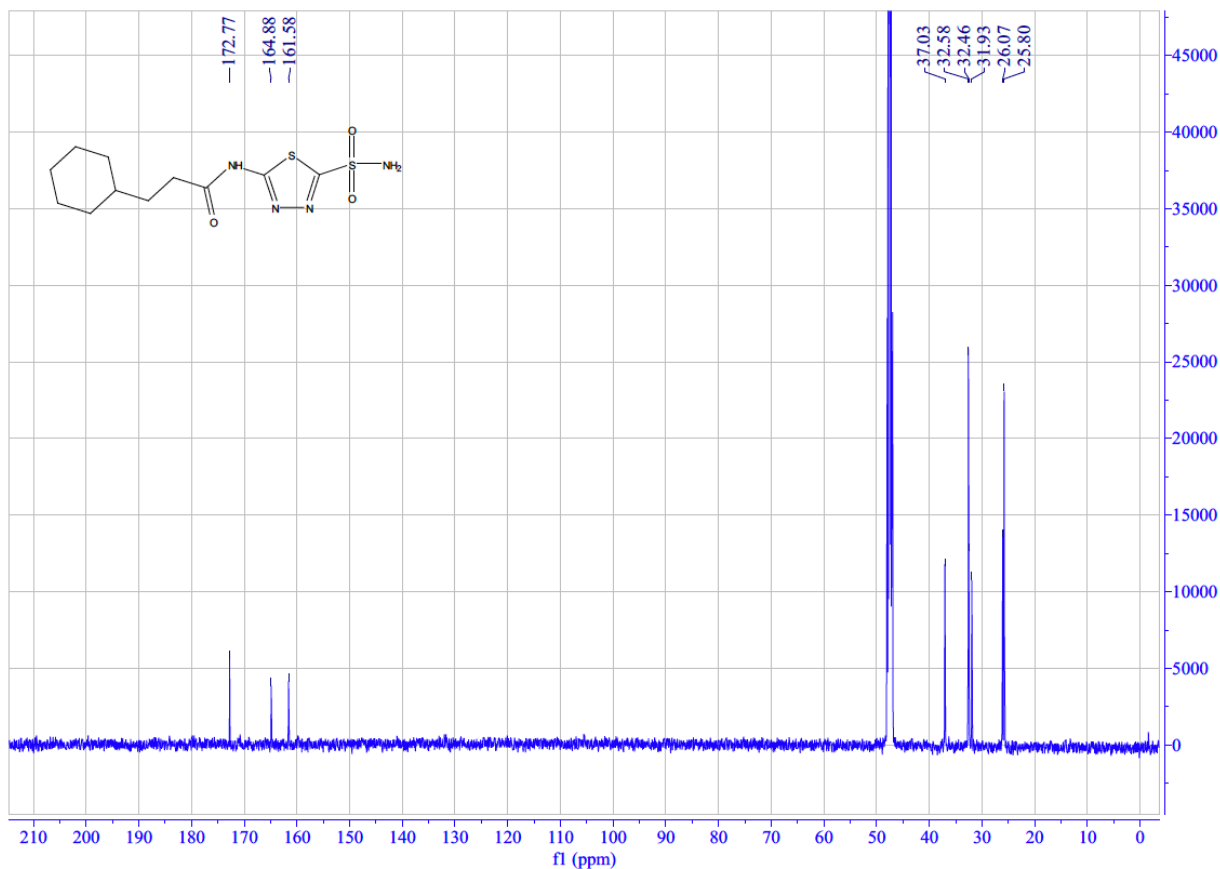

Compound 22  
Mass Spectrum  
MW = 318.1 g/mol

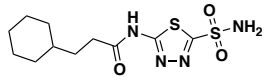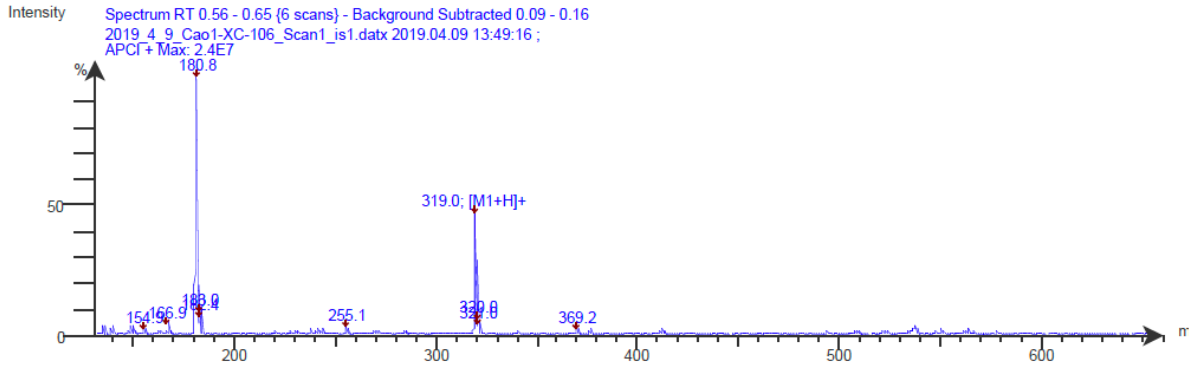

### HPLC

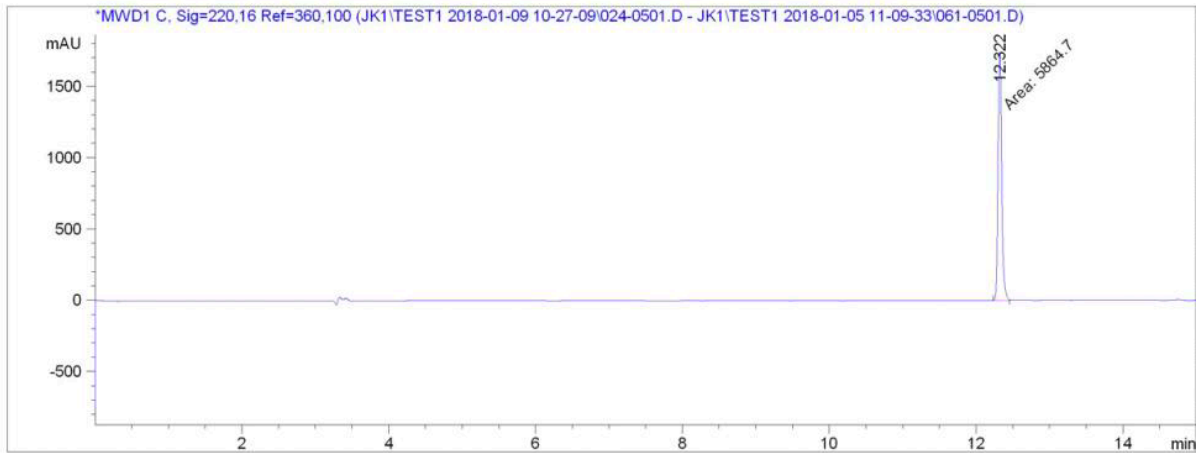

| Peak # | RetTime [min] | Type | Width [min] | Area [mAU*s] | Height [mAU] | Area %   |
|--------|---------------|------|-------------|--------------|--------------|----------|
| 1      | 12.322        | MM   | 0.0560      | 5864.70117   | 1746.27307   | 100.0000 |

Compound 23

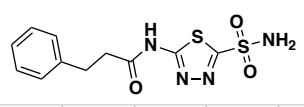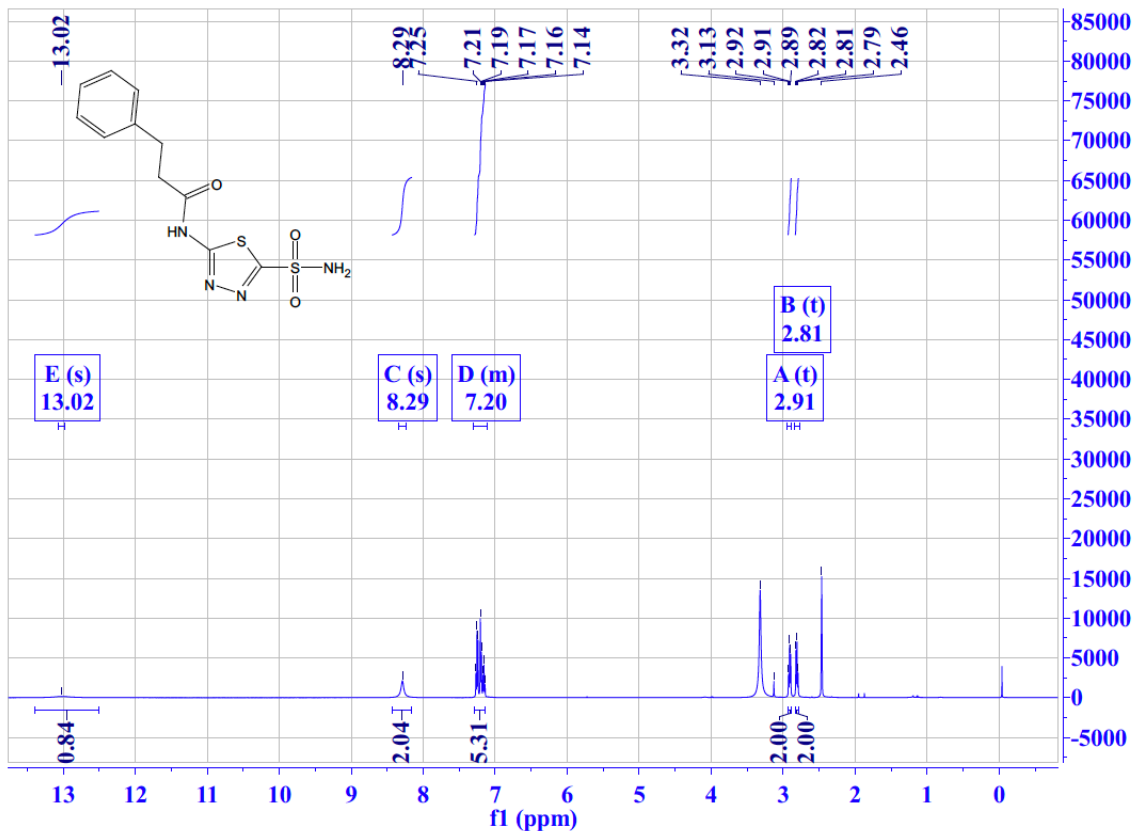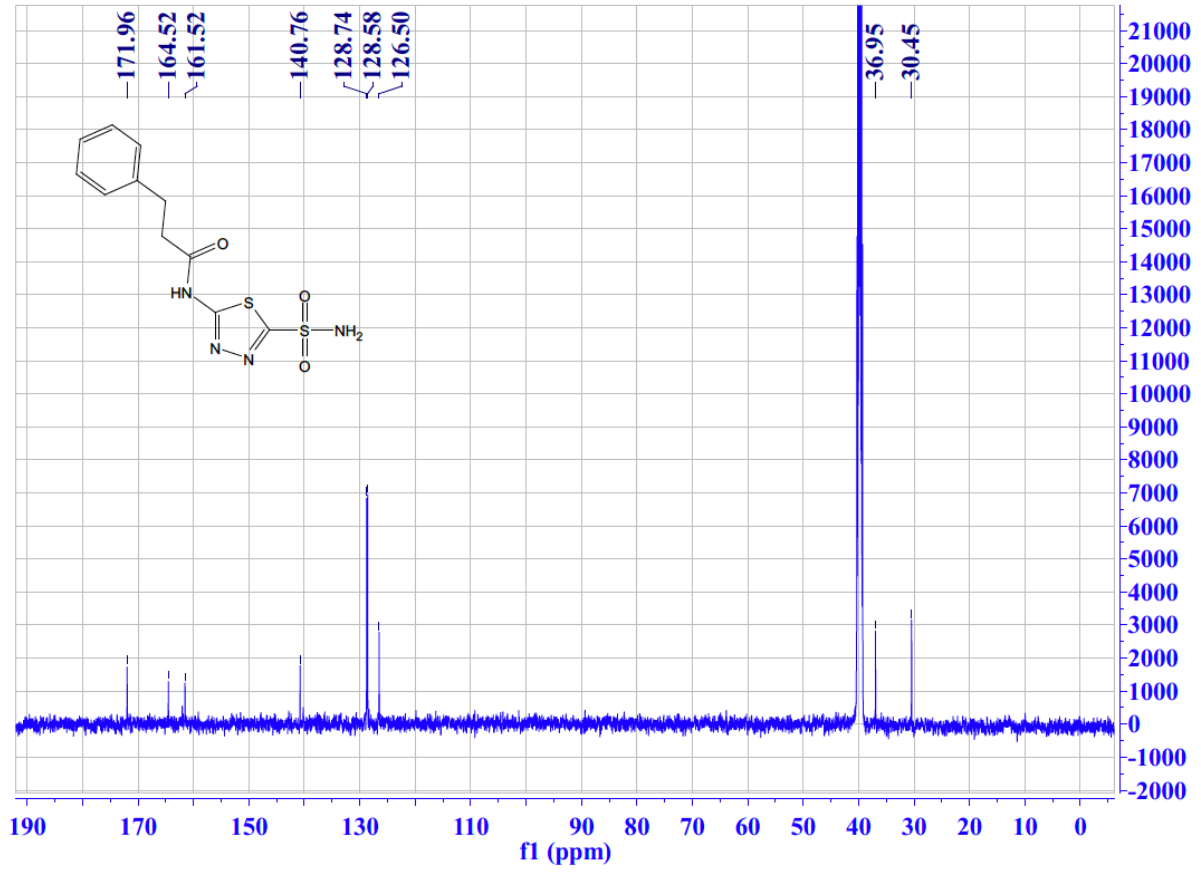

Compound 23  
Mass Spectrum  
MW = 312.0 g/mol

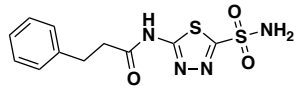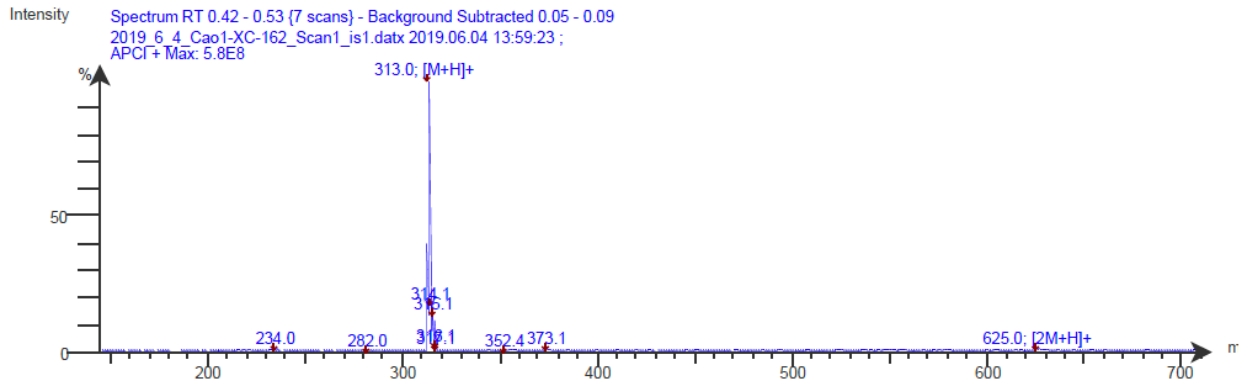

## HPLC

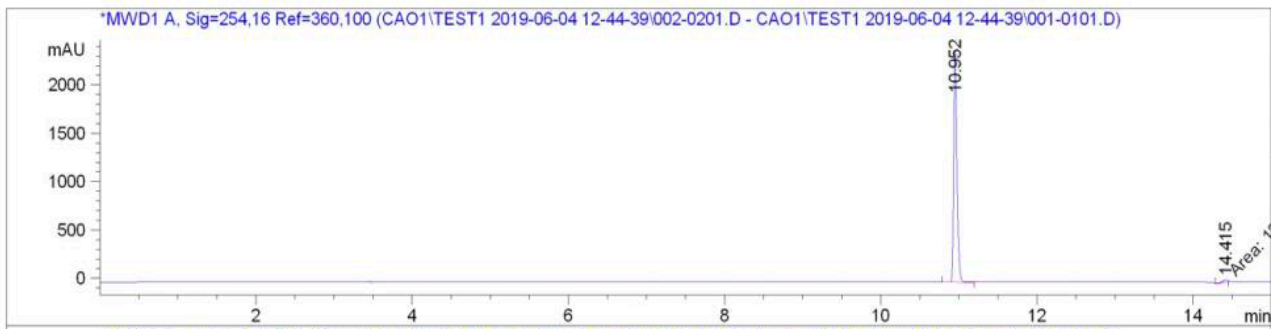

| Peak # | RetTime [min] | Type | Width [min] | Area [mAU*s] | Height [mAU] | Area %  |
|--------|---------------|------|-------------|--------------|--------------|---------|
| 1      | 10.952        | BB   | 0.0446      | 6903.95264   | 2394.15552   | 98.2328 |
| 2      | 14.415        | MM   | 0.0977      | 124.19798    | 21.17730     | 1.7672  |

Compound 24

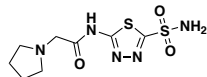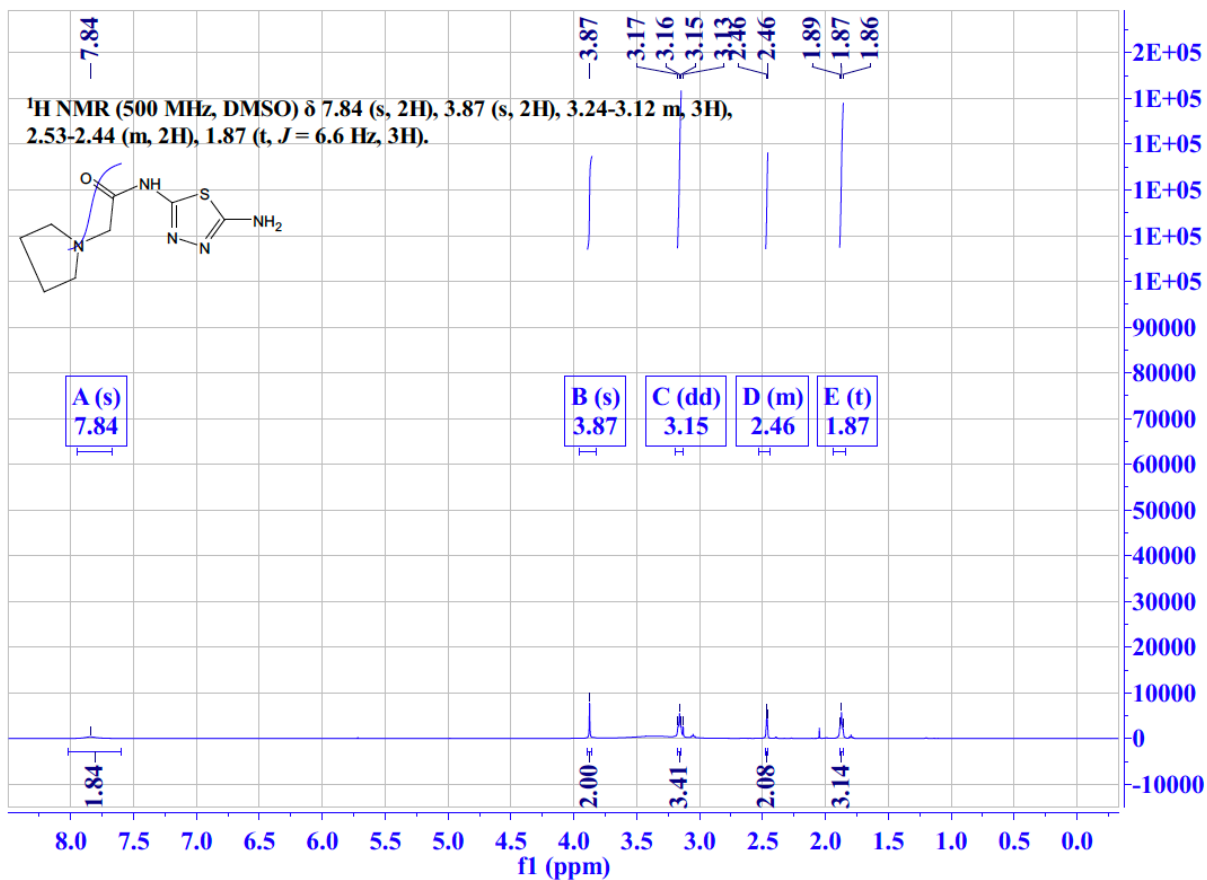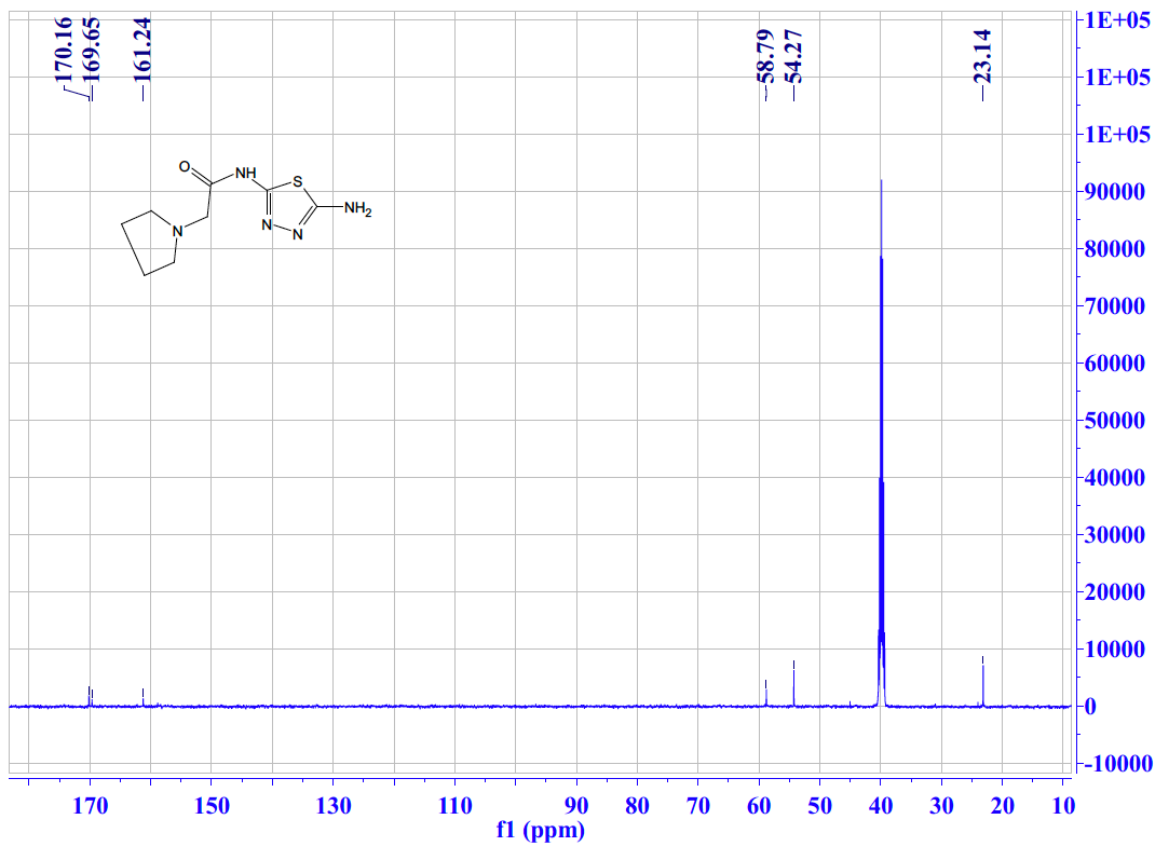

Compound 24  
 Mass Spectrum  
 MW = 291.1 g/mol

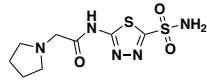

Intensity Spectrum RT 0.32 - 0.47 {10 scans} - Background Subtracted 0.00 - 0.07  
 2019\_3\_3\_18\_Cao1-XC-75\_Scan1\_is1.datx 2019.03.03 18:21:35 ;  
 APCI+ Max: 3.8E7

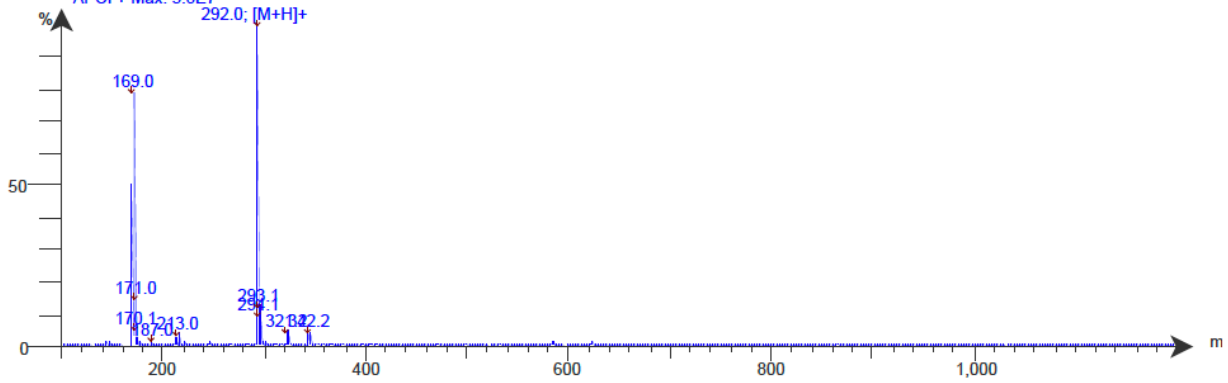

HPLC

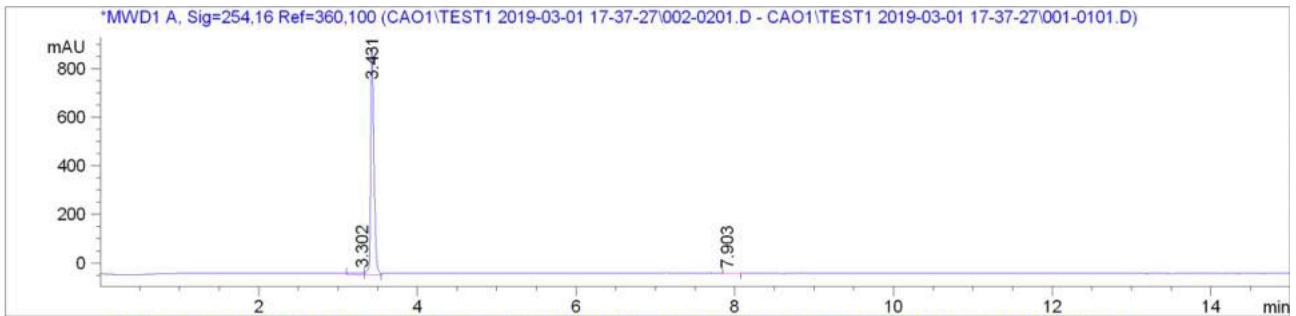

| Peak # | RetTime [min] | Type | Width [min] | Area [mAU*s] | Height [mAU] | Area %  |
|--------|---------------|------|-------------|--------------|--------------|---------|
| 1      | 3.302         | VV   | 0.1443      | 78.16506     | 6.83861      | 2.8666  |
| 2      | 3.431         | VV   | 0.0430      | 2638.26074   | 932.05353    | 96.7549 |
| 3      | 7.903         | BB   | 0.0725      | 10.32100     | 1.89704      | 0.3785  |



Compound 25

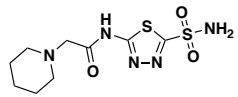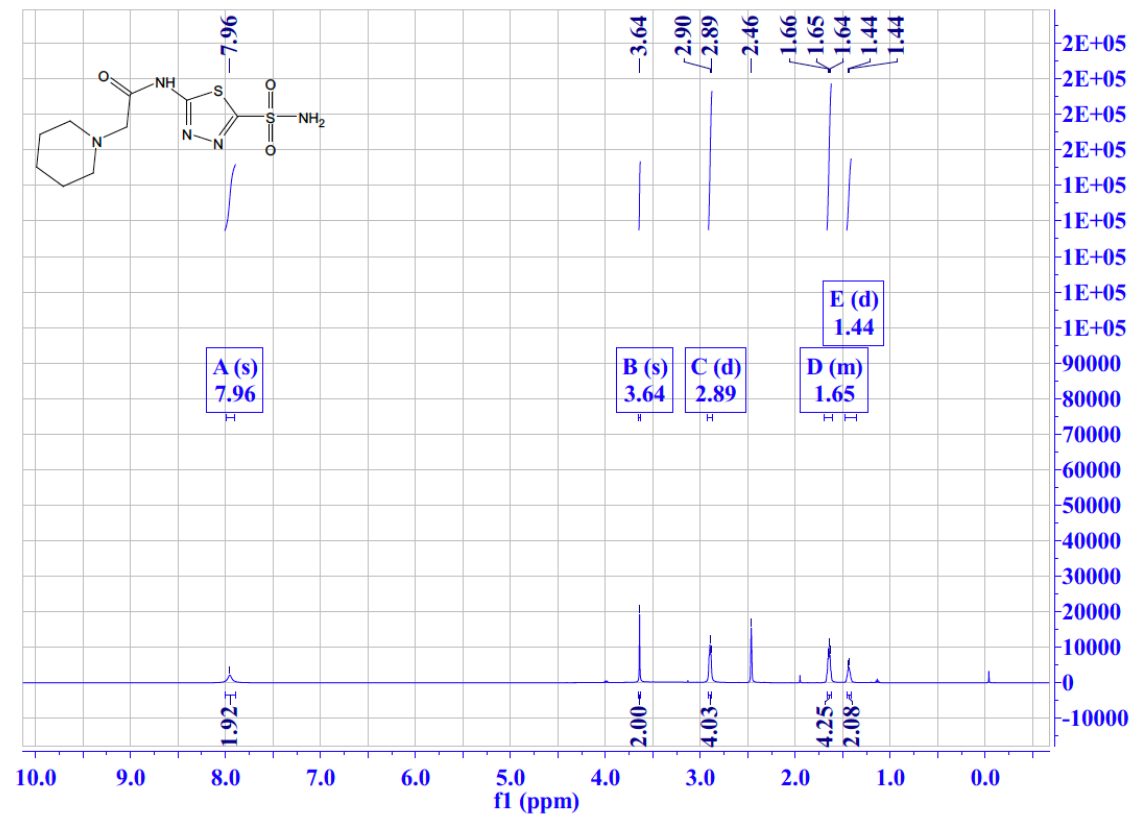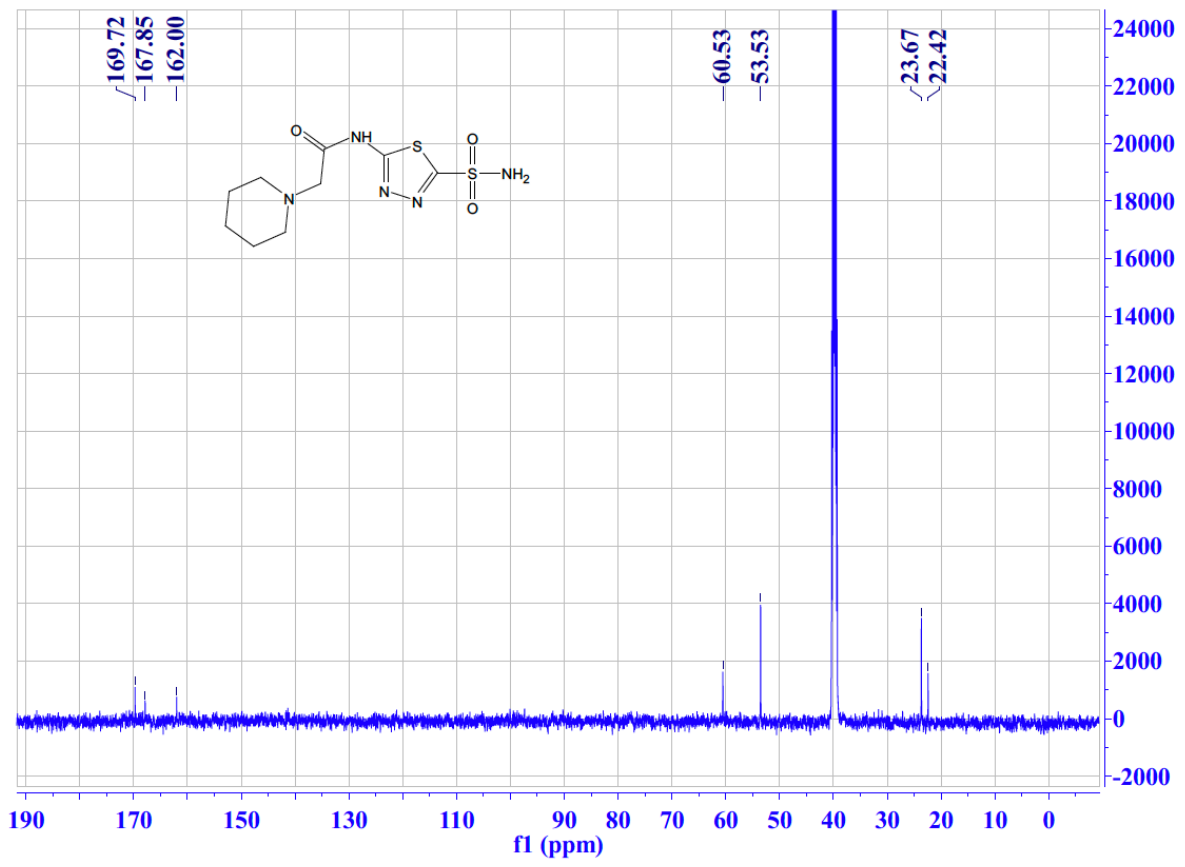

Compound 25  
Mass Spectrum  
MW = 305.1 g/mol

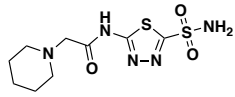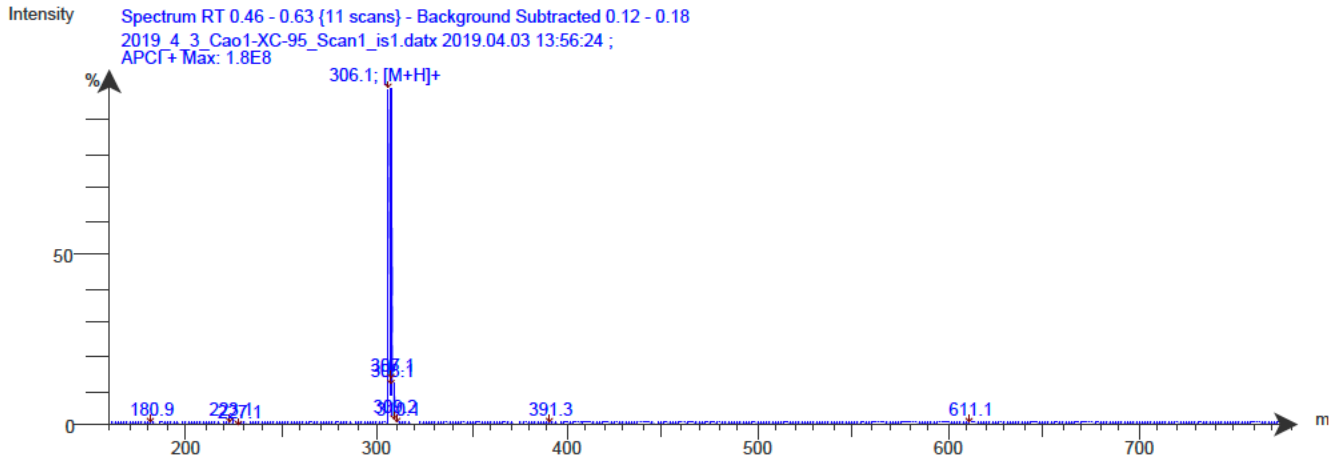

HPLC

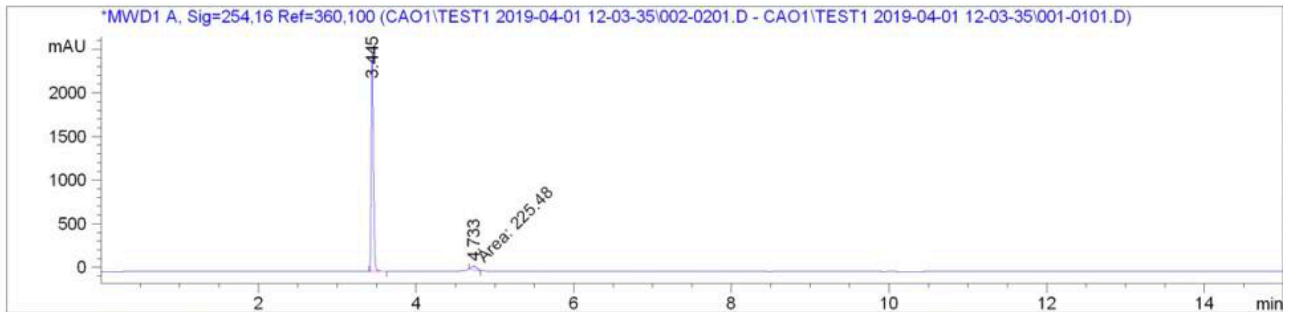

| Peak # | RetTime [min] | Type | Width [min] | Area [mAU*s] | Height [mAU] | Area %  |
|--------|---------------|------|-------------|--------------|--------------|---------|
| 1      | 3.445         | VB   | 0.0288      | 4588.11865   | 2574.66089   | 95.3158 |
| 2      | 4.733         | PM   | 0.0916      | 225.48001    | 41.00815     | 4.6842  |

Compound 26

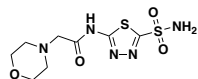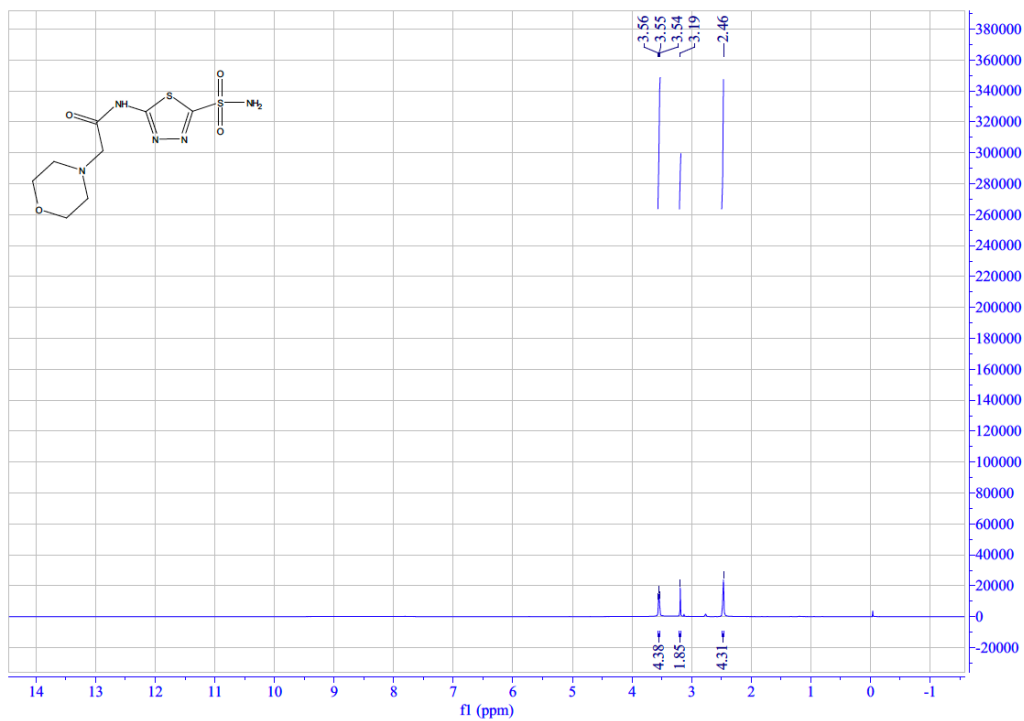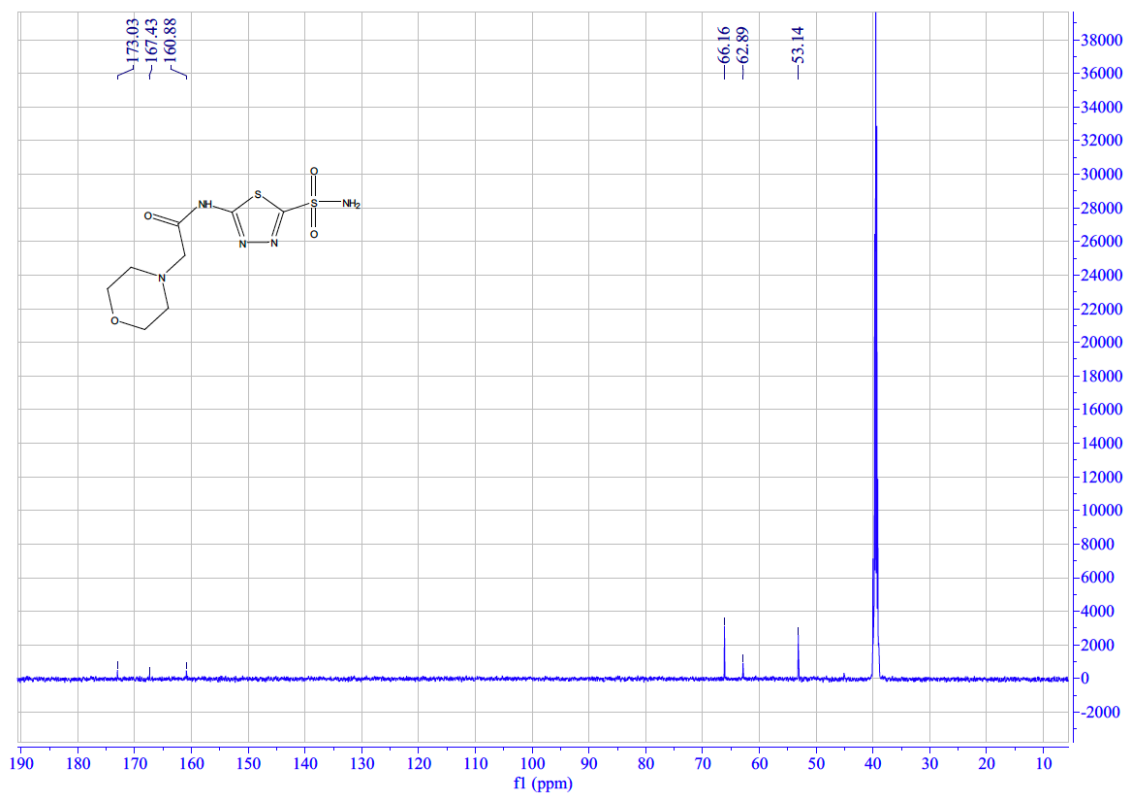

Compound 26  
 Mass Spectrum  
 MW = 307.0 g/mol

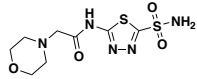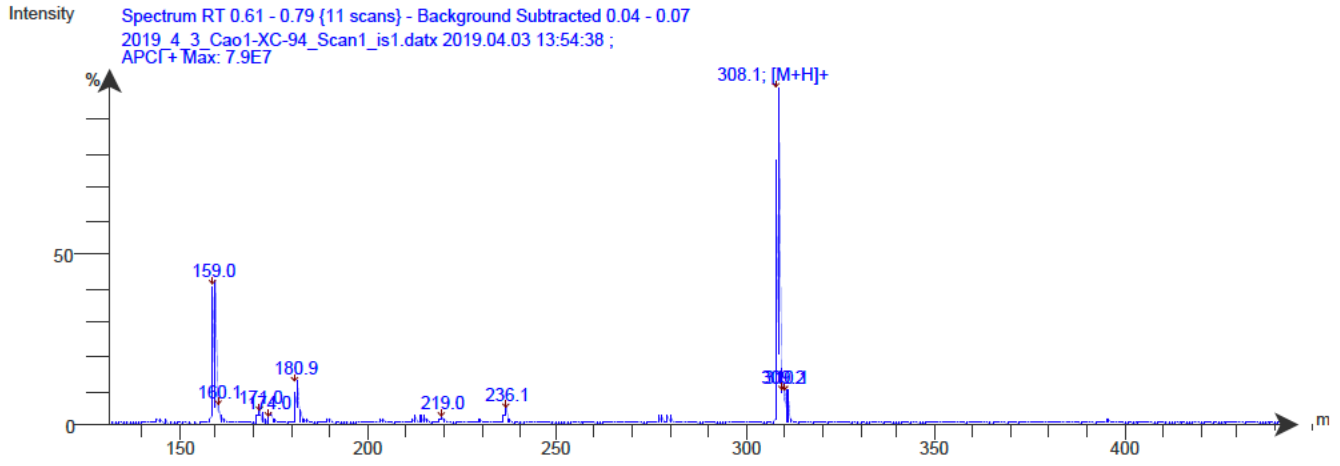

HPLC

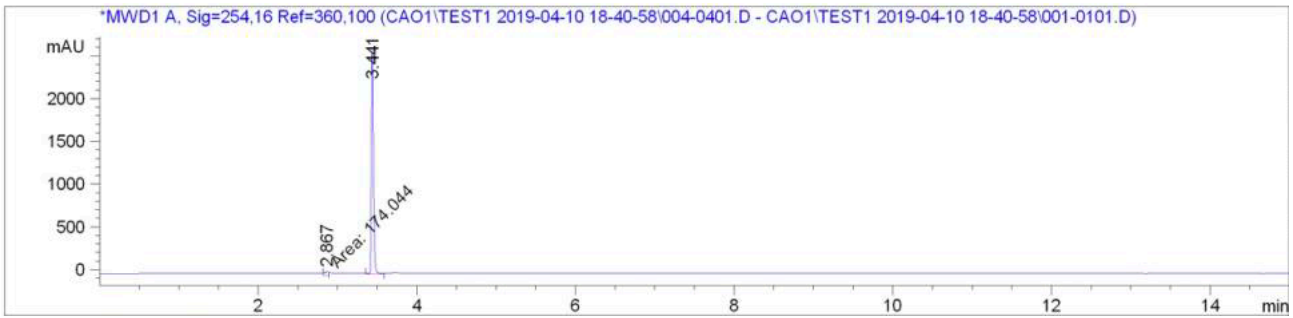

| Peak # | RetTime [min] | Type | Width [min] | Area [mAU*s] | Height [mAU] | Area %  |
|--------|---------------|------|-------------|--------------|--------------|---------|
| 1      | 2.867         | MM   | 0.0614      | 174.04378    | 47.21126     | 3.6259  |
| 2      | 3.441         | VV   | 0.0274      | 4625.93213   | 2644.58740   | 96.3741 |

Compound 27

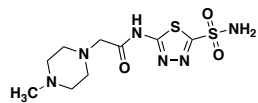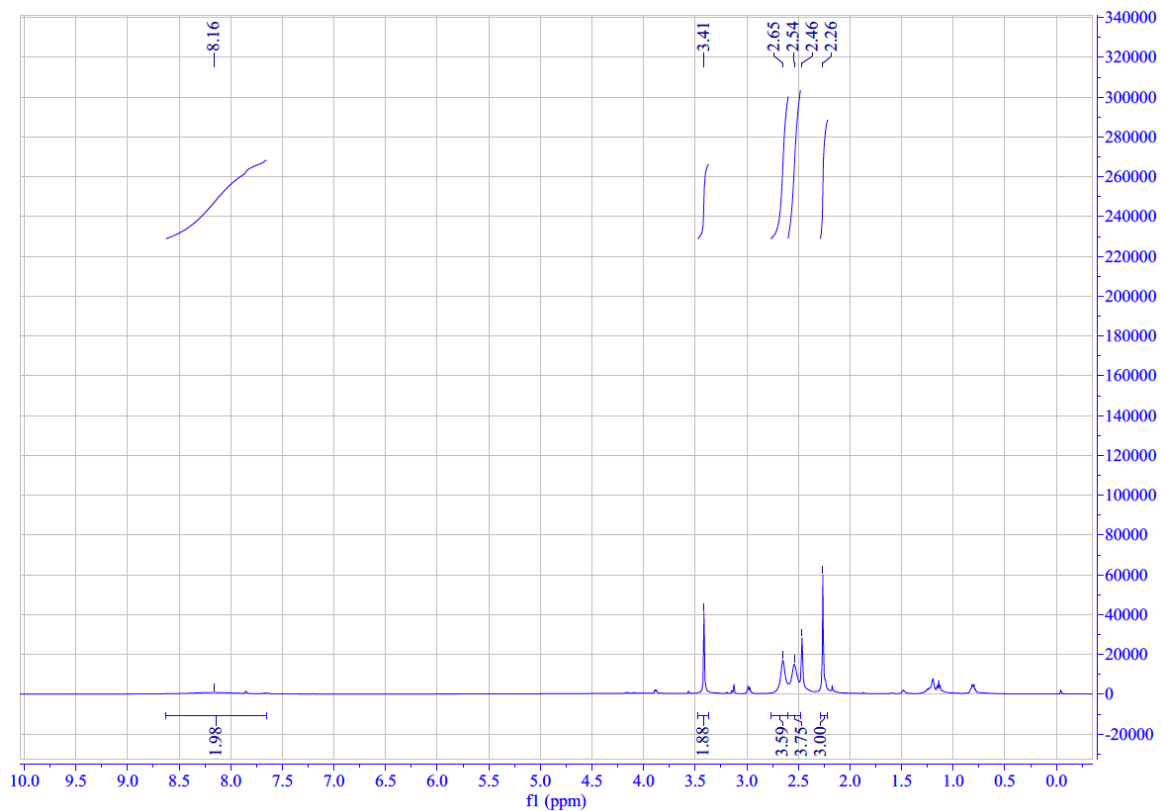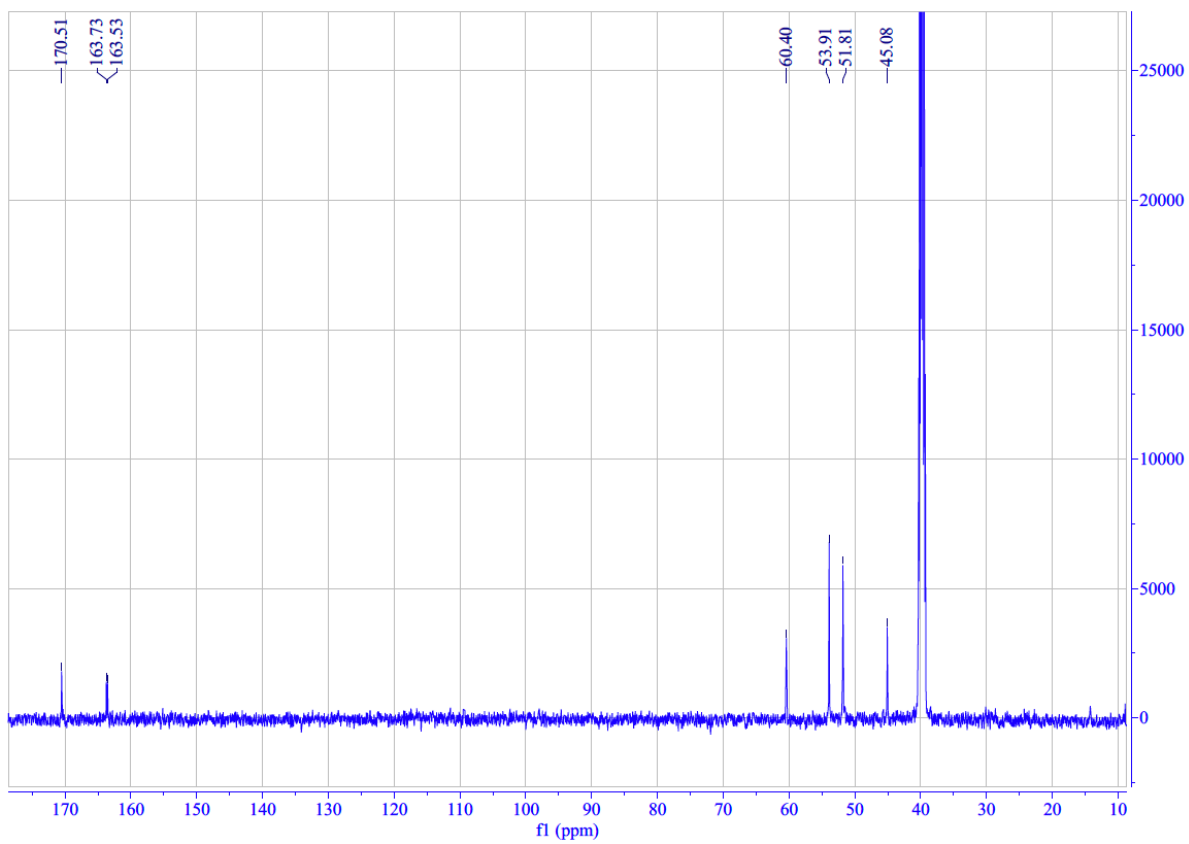

Compound 27  
 Mass Spectrum  
 MW = 320.1 g/mol

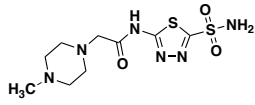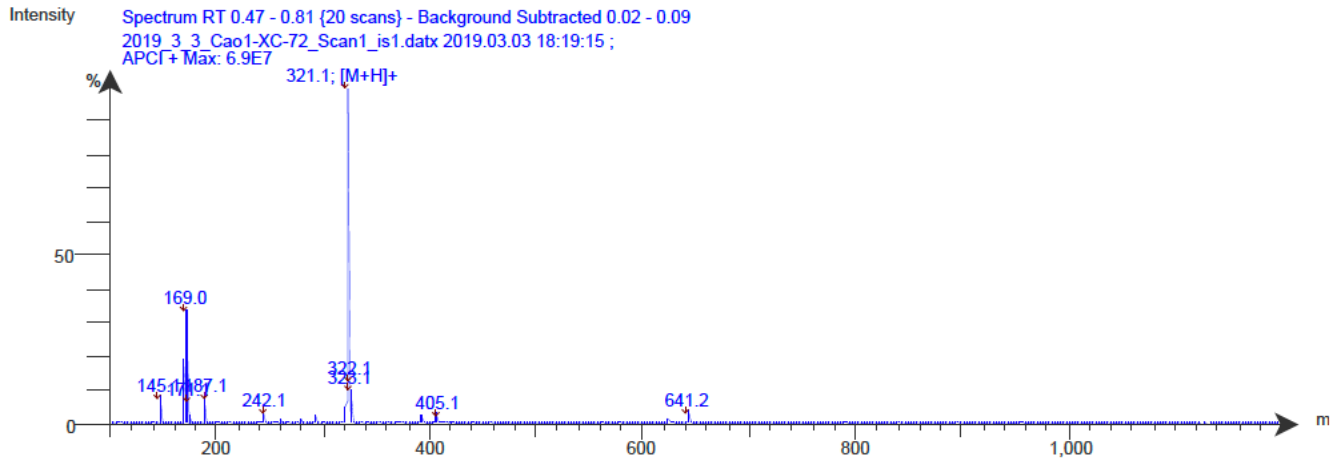

HPLC

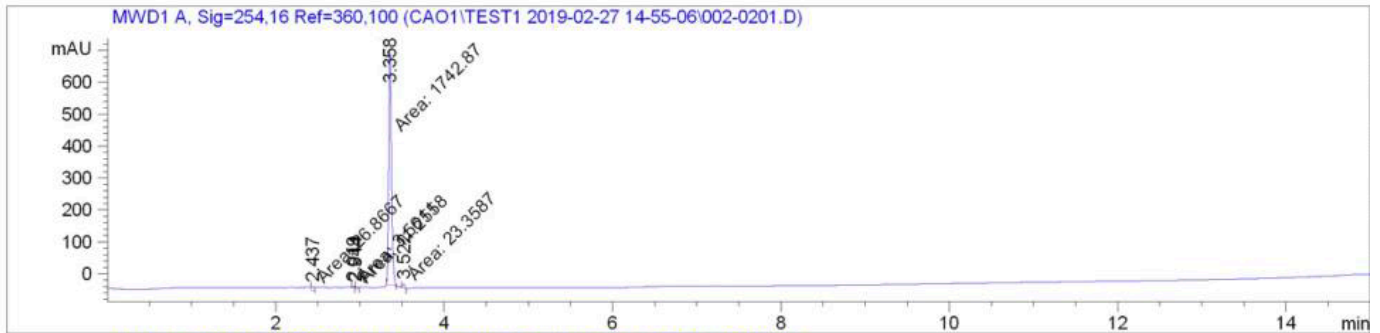

| Peak # | RetTime [min] | Type | Width [min] | Area [mAU*s] | Height [mAU] | Area %  |
|--------|---------------|------|-------------|--------------|--------------|---------|
| 1      | 2.437         | MM   | 0.0417      | 26.86675     | 10.72882     | 1.4861  |
| 2      | 2.919         | MP   | 0.0320      | 3.56110      | 1.85750      | 0.1970  |
| 3      | 2.944         | MM   | 0.0445      | 11.25579     | 4.21717      | 0.6226  |
| 4      | 3.358         | MM   | 0.0392      | 1742.87451   | 740.59814    | 96.4024 |
| 5      | 3.522         | MM   | 0.0320      | 23.35868     | 12.16491     | 1.2920  |

Compound 28

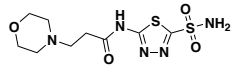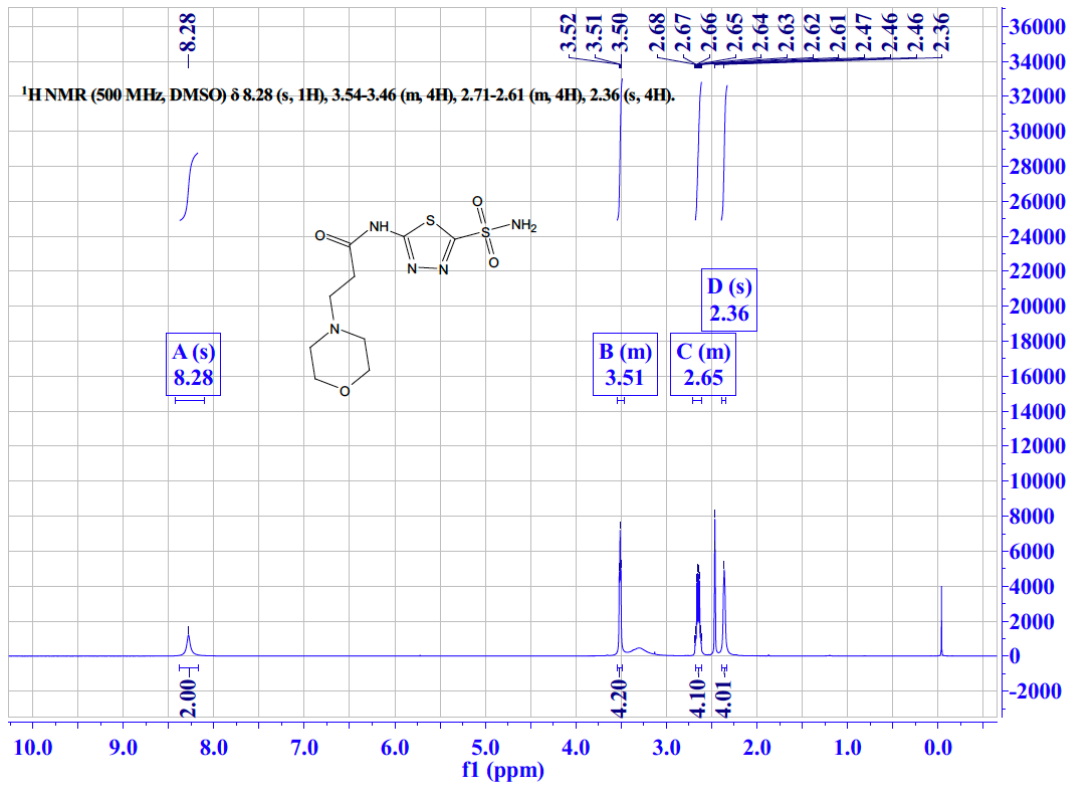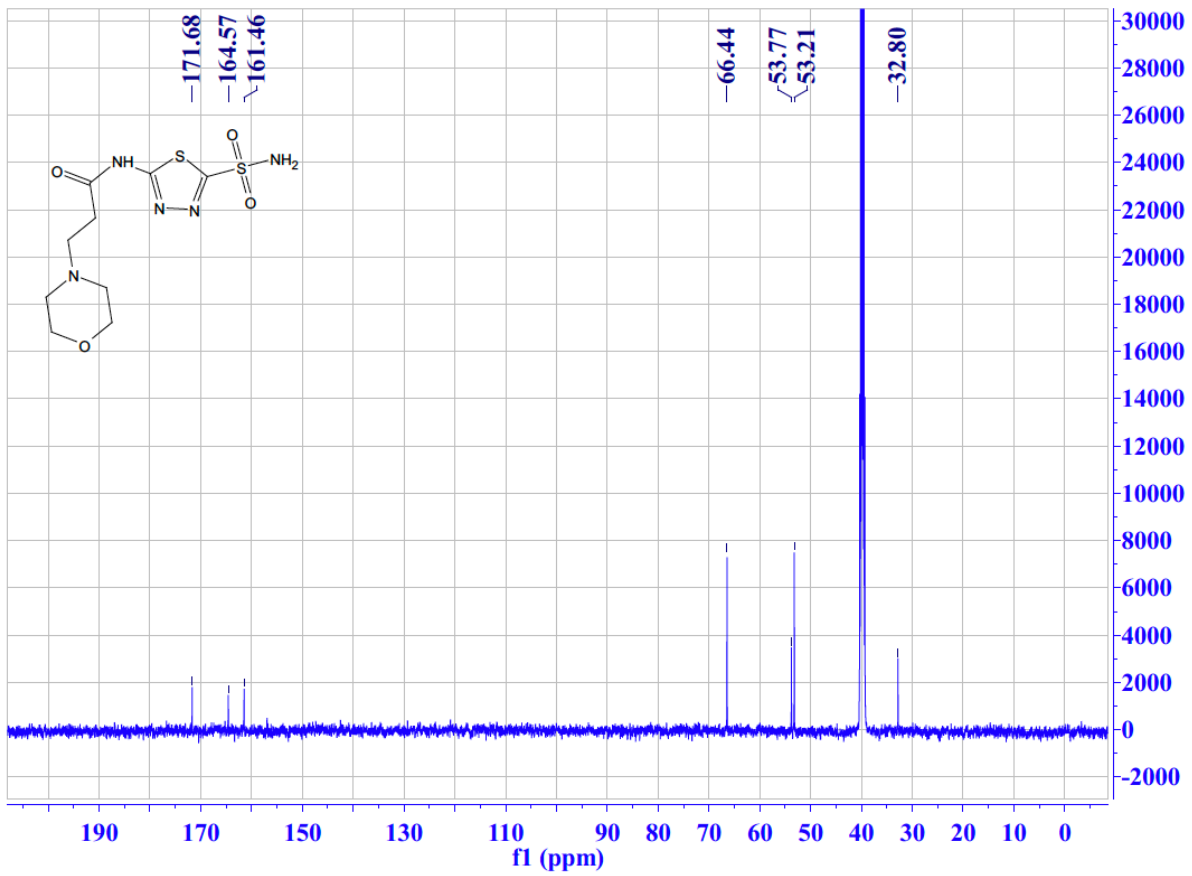

Compound 28  
Mass Spectrum  
MW = 321.1 g/mol

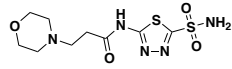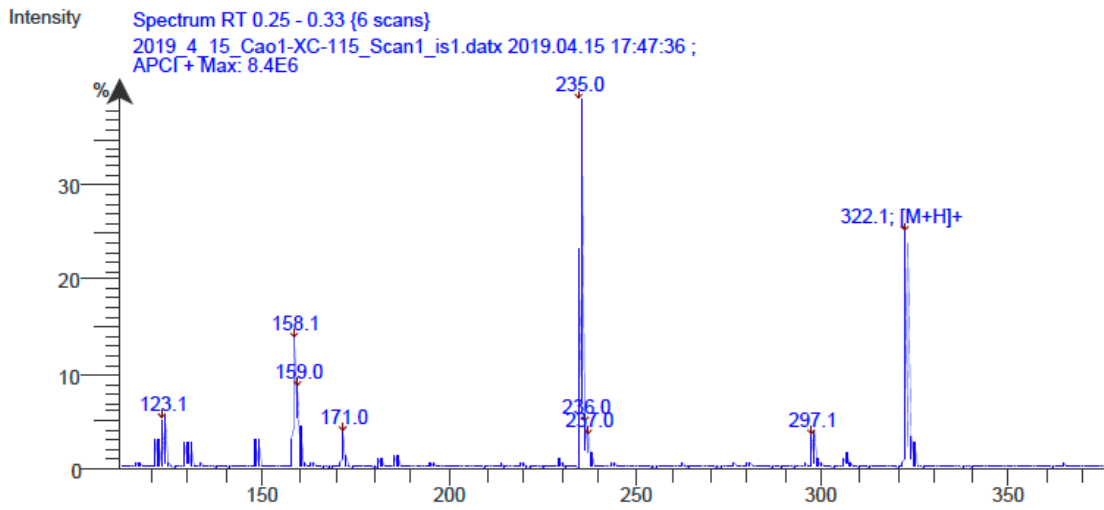

HPLC

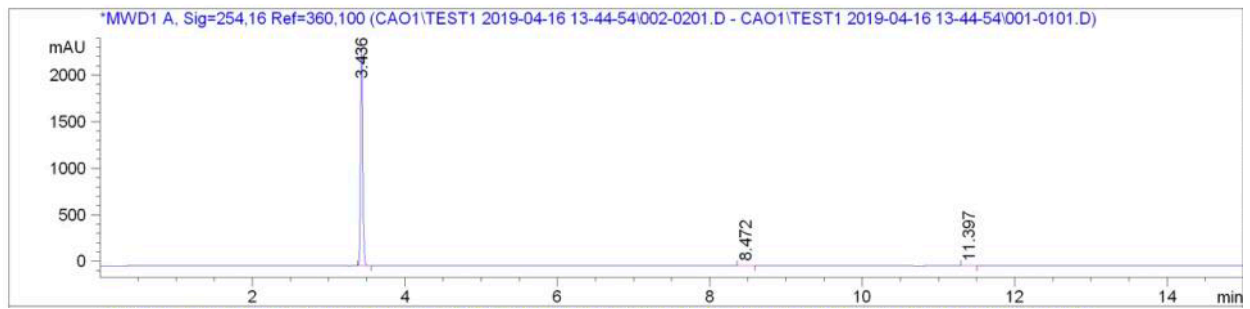

| Peak # | RetTime [min] | Type | Width [min] | Area [mAU*s] | Height [mAU] | Area %  |
|--------|---------------|------|-------------|--------------|--------------|---------|
| 1      | 3.436         | VV   | 0.0311      | 4652.25195   | 2353.36841   | 99.2778 |
| 2      | 8.472         | BV   | 0.0835      | 11.12431     | 1.78959      | 0.2374  |
| 3      | 11.397        | BV   | 0.1680      | 22.71927     | 1.86705      | 0.4848  |



Compound 29

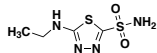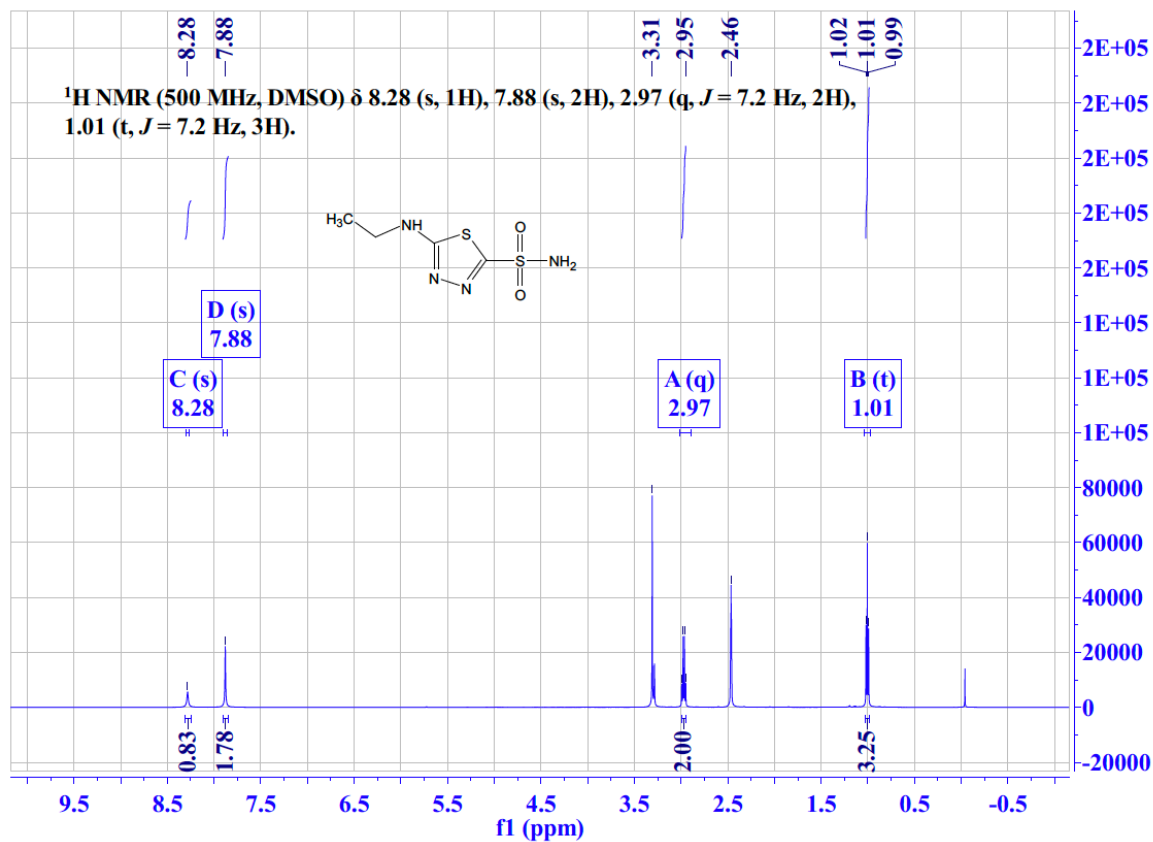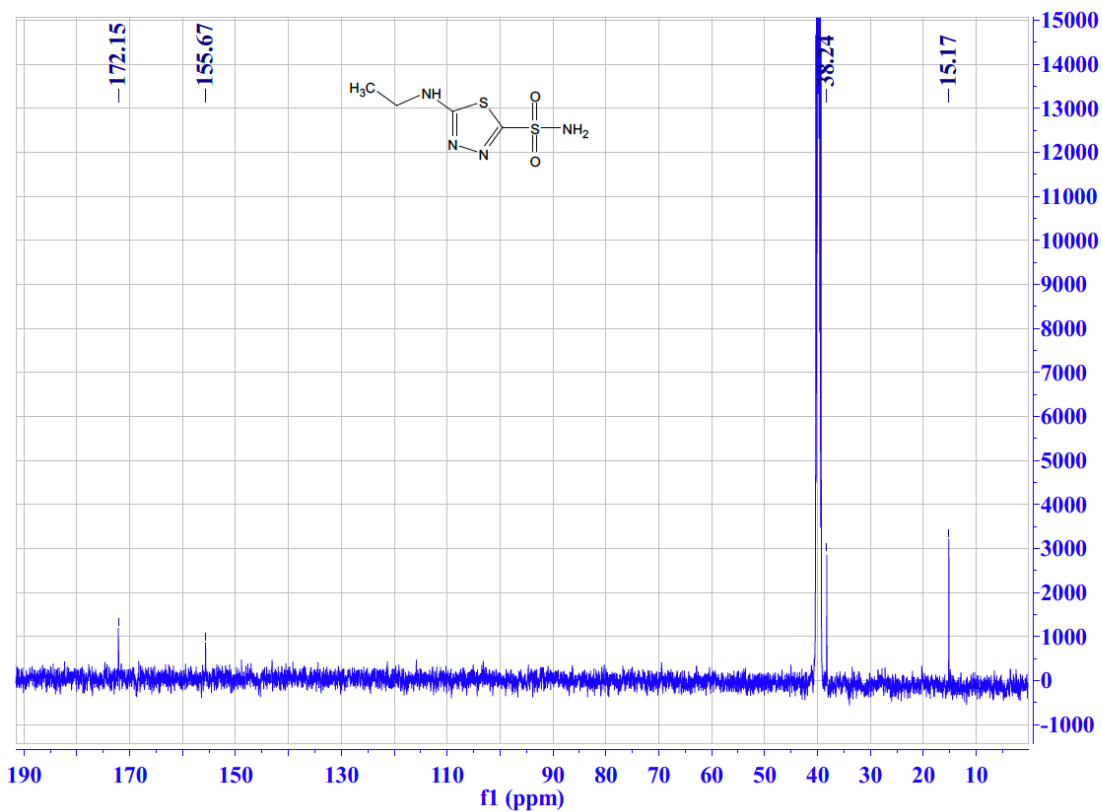

Compound 29  
 Mass Spectrum  
 MW = 208.0 g/mol

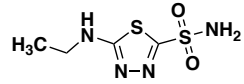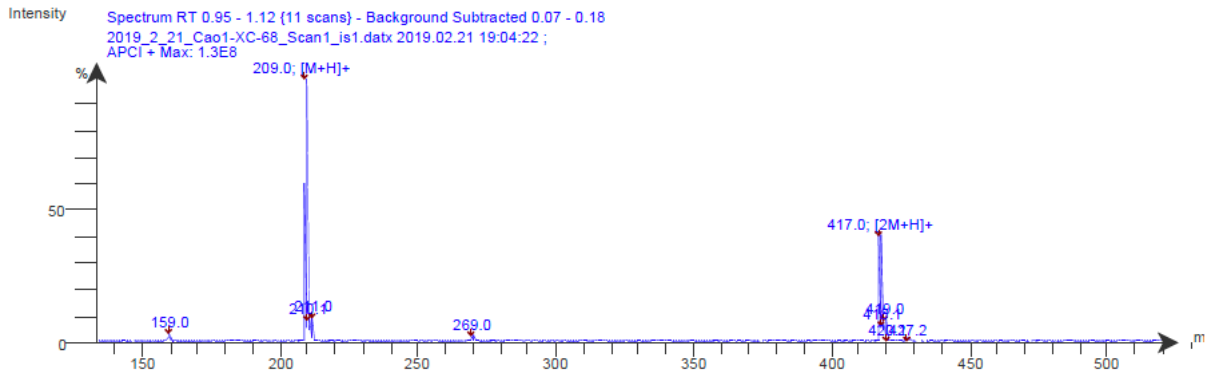

HPLC

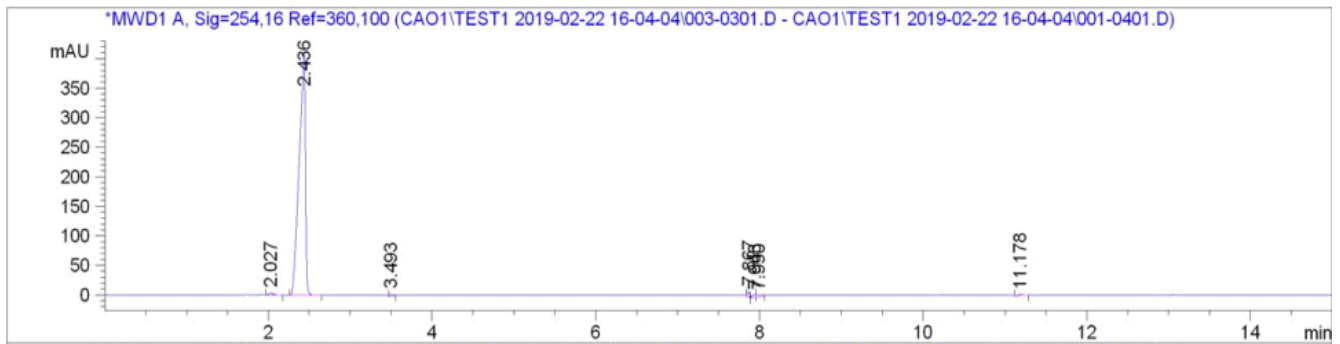

| Peak # | RetTime [min] | Type | Width [min] | Area [mAU*s] | Height [mAU] | Area %  |
|--------|---------------|------|-------------|--------------|--------------|---------|
| 1      | 2.027         | VB   | 0.0500      | 13.09933     | 3.82122      | 0.5770  |
| 2      | 2.436         | BB   | 0.0734      | 2197.51514   | 410.77835    | 96.7900 |
| 3      | 3.493         | VB   | 0.0391      | 7.20370      | 2.70368      | 0.3173  |
| 4      | 7.867         | EV   | 0.0257      | 16.97244     | 10.04303     | 0.7476  |
| 5      | 7.943         | VV   | 0.0534      | 12.95494     | 3.93640      | 0.5706  |
| 6      | 7.990         | VB   | 0.0714      | 17.69786     | 3.30752      | 0.7795  |
| 7      | 11.178        | BB   | 0.0421      | 4.95117      | 1.85865      | 0.2181  |

Compound 30

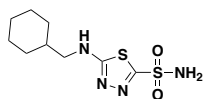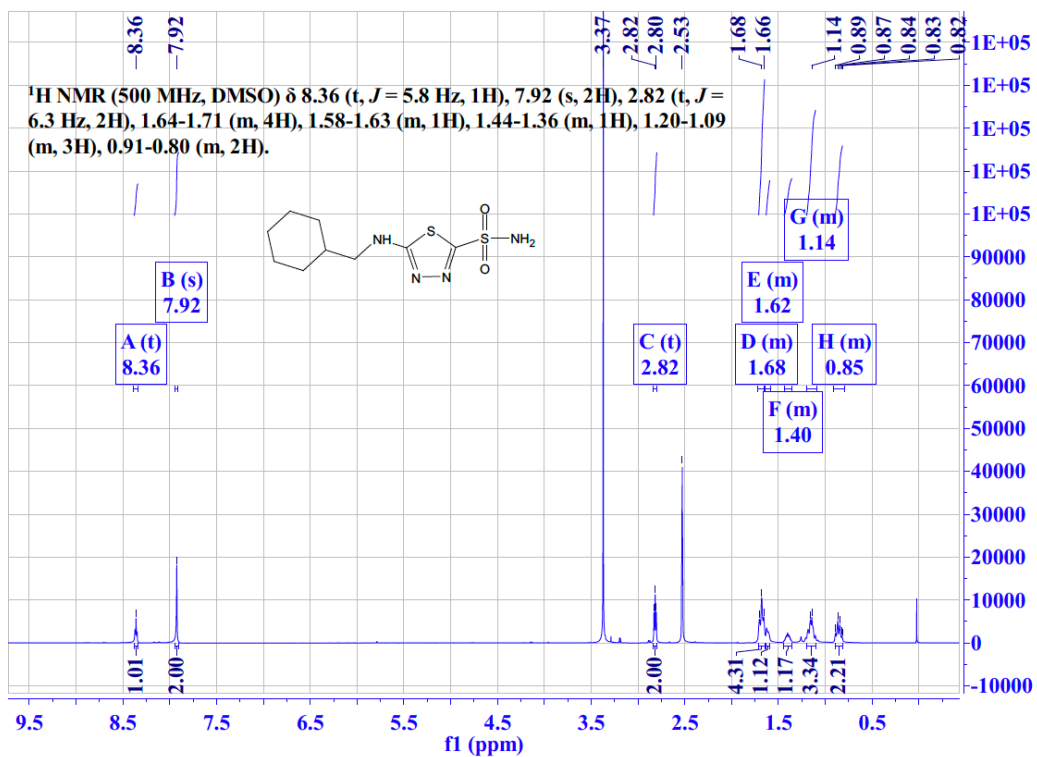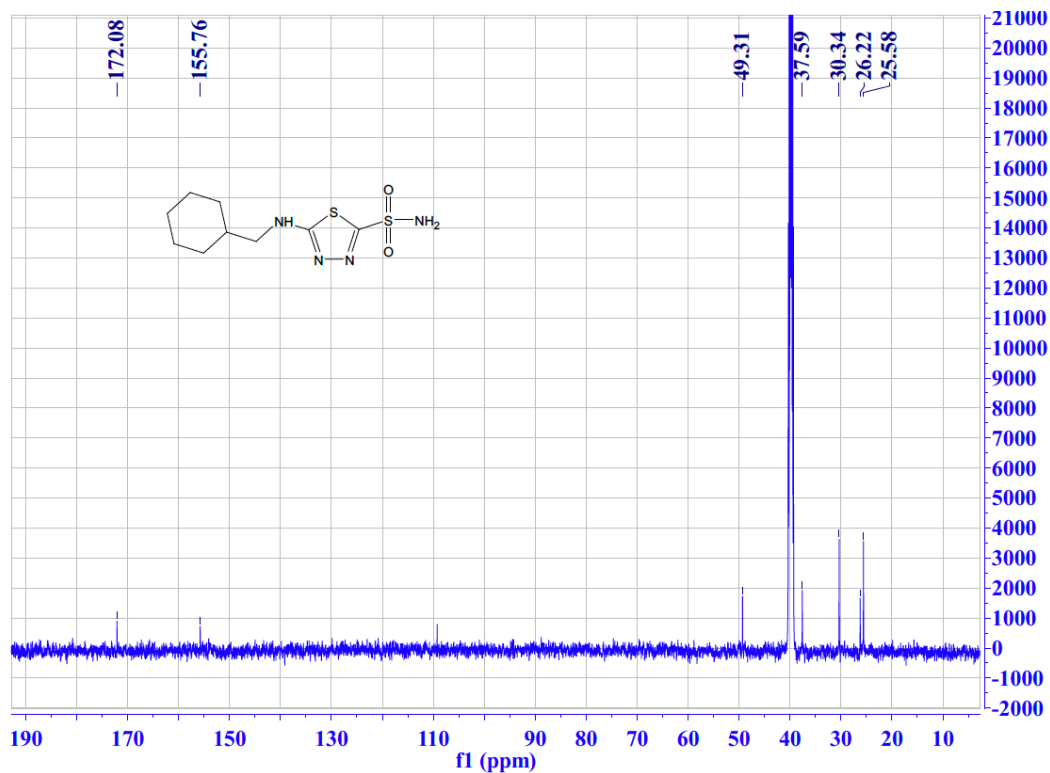

Compound 30  
 Mass Spectrum  
 MW = 276.1 g/mol

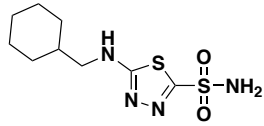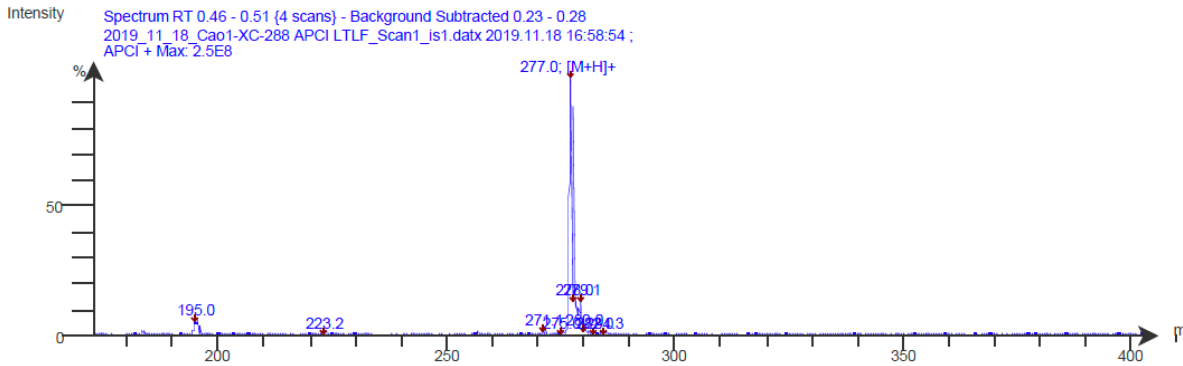

HPLC

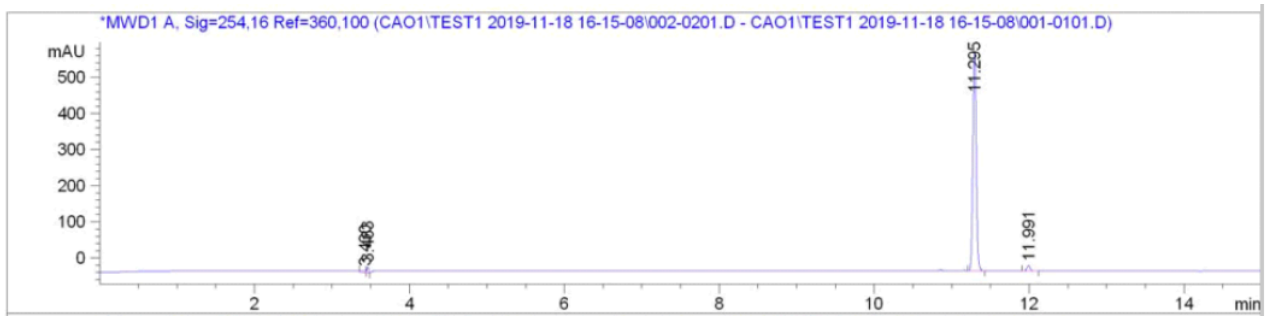

| Peak #   | RetTime [min] | Type | Width [min] | Area [mAU*s] | Height [mAU] | Area %  |
|----------|---------------|------|-------------|--------------|--------------|---------|
| 1        | 3.430         | BV   | 0.0727      | 24.96288     | 5.13490      | 1.2933  |
| 2        | 3.463         | VV   | 0.0215      | 21.19434     | 15.93033     | 1.0981  |
| 3        | 11.295        | VV   | 0.0474      | 1838.34619   | 605.57916    | 95.2424 |
| 4        | 11.991        | VB   | 0.0474      | 45.67251     | 15.06705     | 2.3662  |
| Totals : |               |      |             | 1930.17592   | 641.71144    |         |

Compound 31

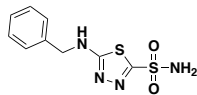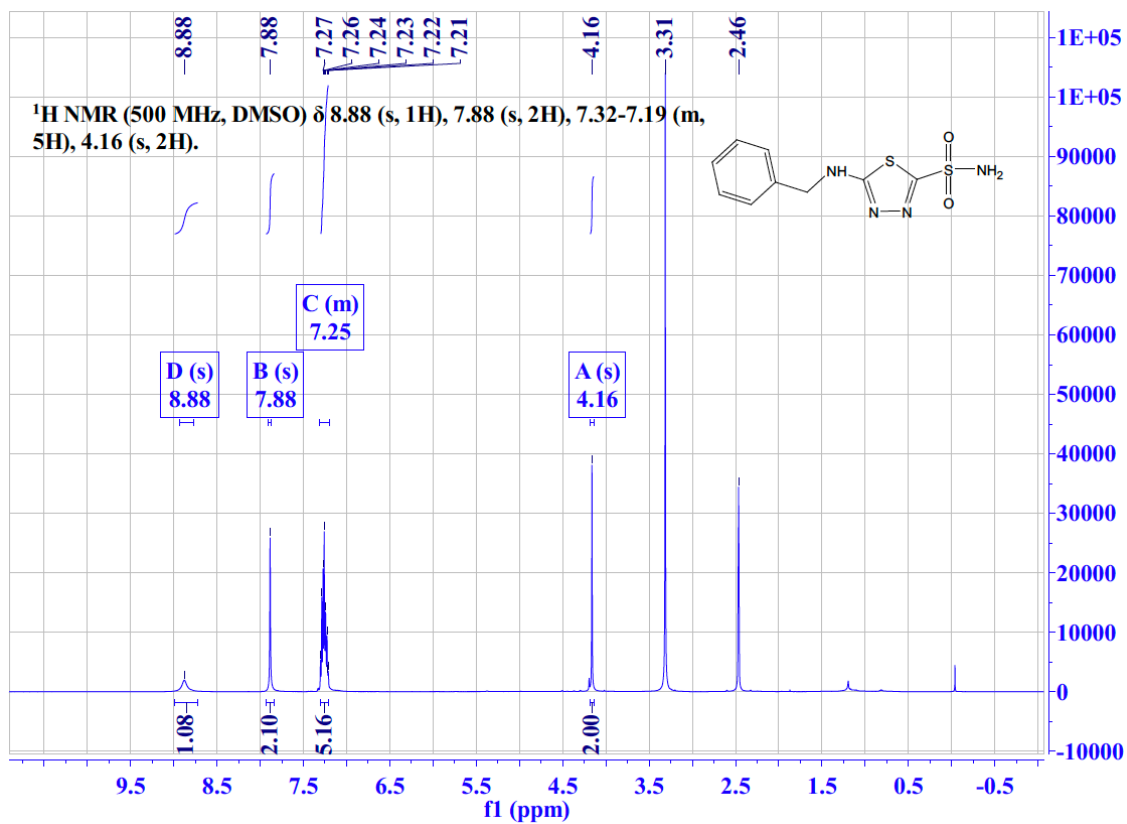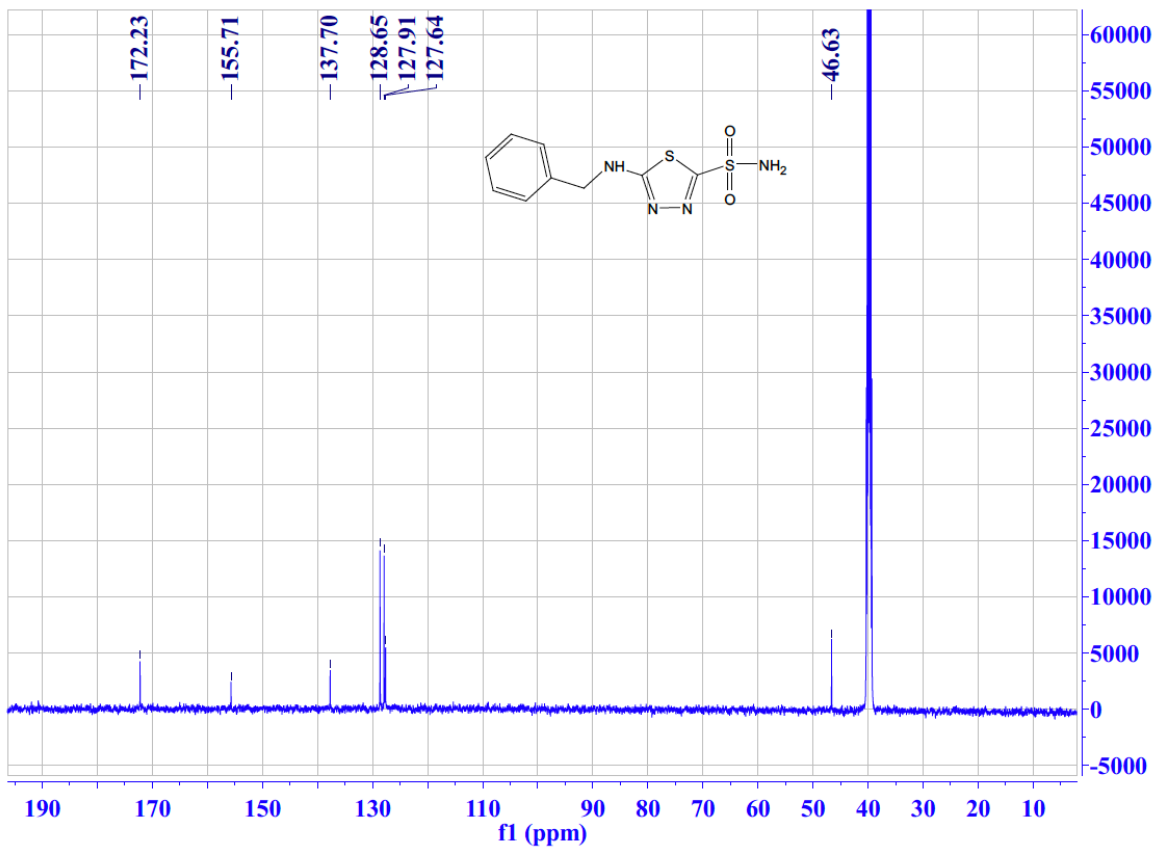

Compound 31  
 Mass Spectrum  
 MW = 270.1 g/mol

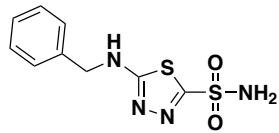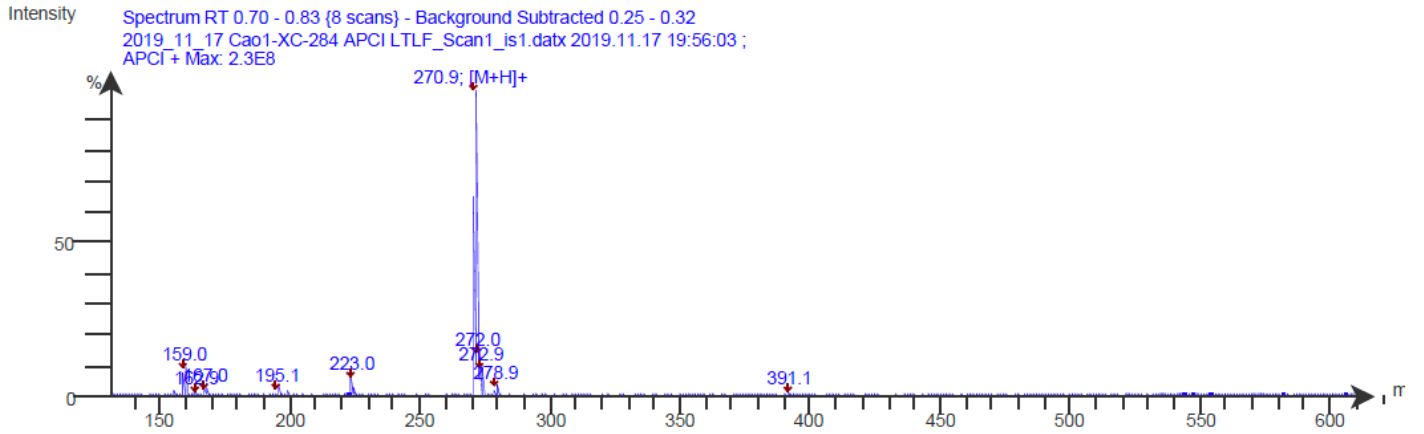

HPLC

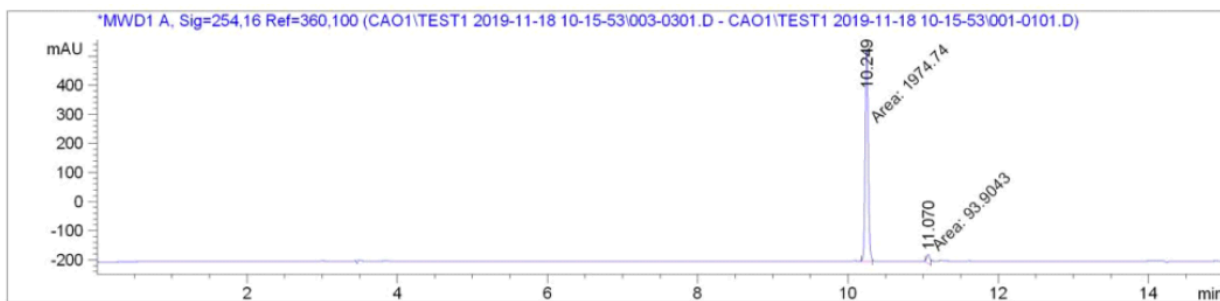

| Peak #   | RetTime [min] | Type | Width [min] | Area [mAU*s] | Height [mAU] | Area %  |
|----------|---------------|------|-------------|--------------|--------------|---------|
| 1        | 10.249        | MM   | 0.0452      | 1974.73901   | 727.99048    | 95.4606 |
| 2        | 11.070        | MM   | 0.0504      | 93.90431     | 31.07440     | 4.5394  |
| Totals : |               |      |             | 2068.64333   | 759.06488    |         |

# Compound 33

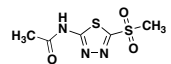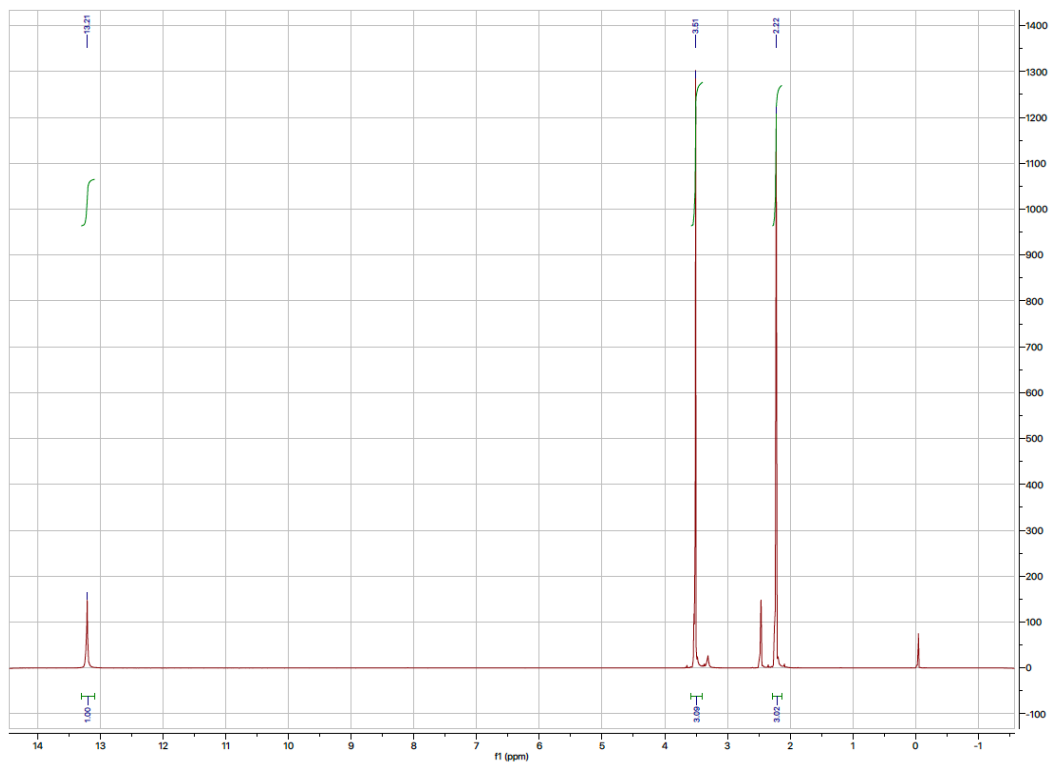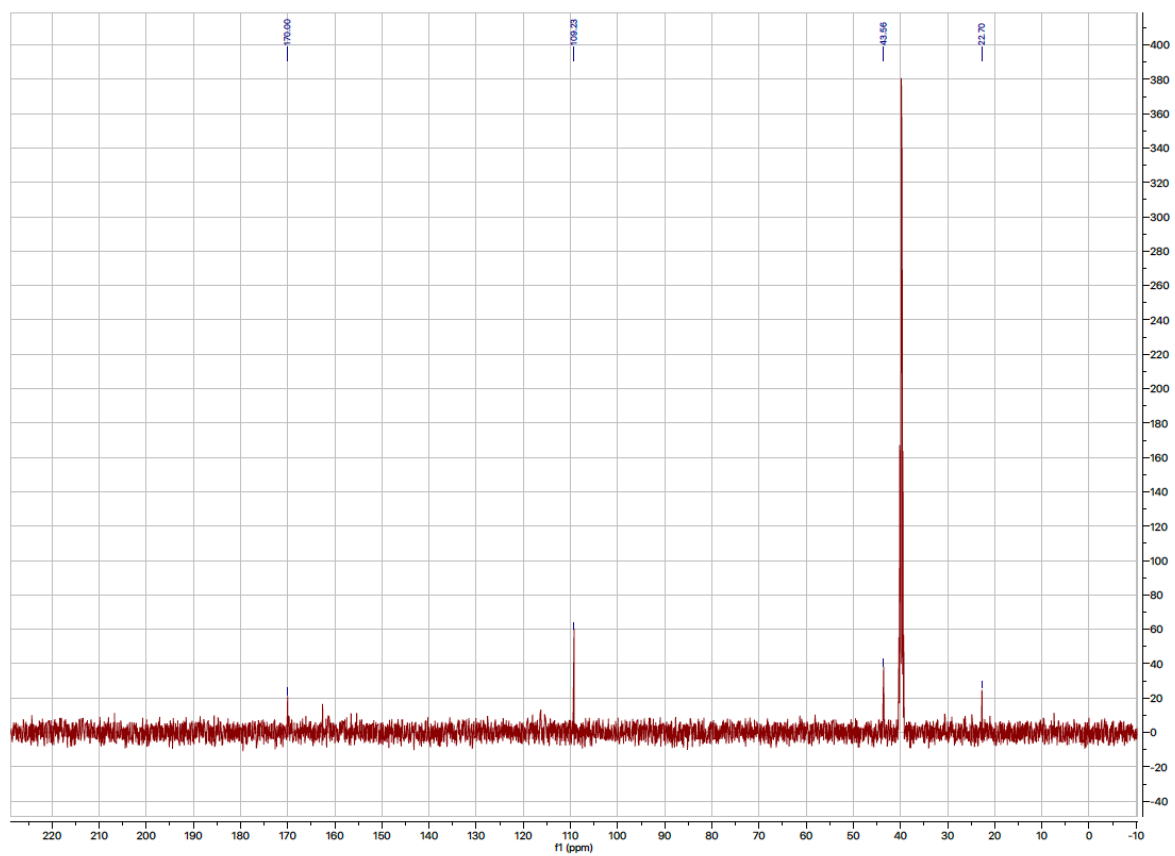

Compound 33  
Mass Spectrum

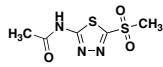

MW = 221.0 g/mol

Spectrum RT 0.39 - 0.51 (8 scans) - Background Subtracted 0.12 - 0.33  
WA-022 product 2nd\_Scan1\_is1.datx 2019.11.12 11:10:22 ;  
Intensity APCI + Max: 8.6E7

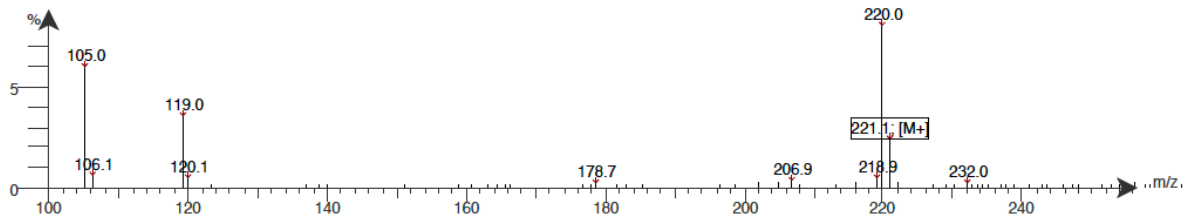

HPLC

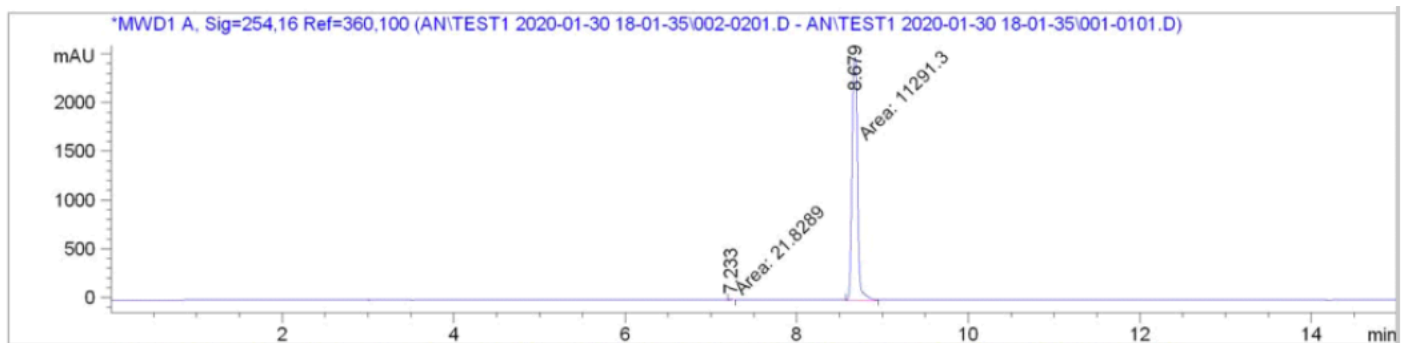

| Peak # | RetTime [min] | Type | Width [min] | Area [mAU*s] | Height [mAU] | Area %  |
|--------|---------------|------|-------------|--------------|--------------|---------|
| 1      | 7.233         | MM   | 0.0446      | 21.82893     | 8.15010      | 0.1930  |
| 2      | 8.679         | MM   | 0.0755      | 1.12913e4    | 2491.54492   | 99.8070 |

Totals : 1.13131e4 2499.69502



Compound 34

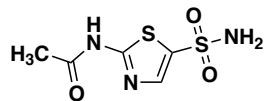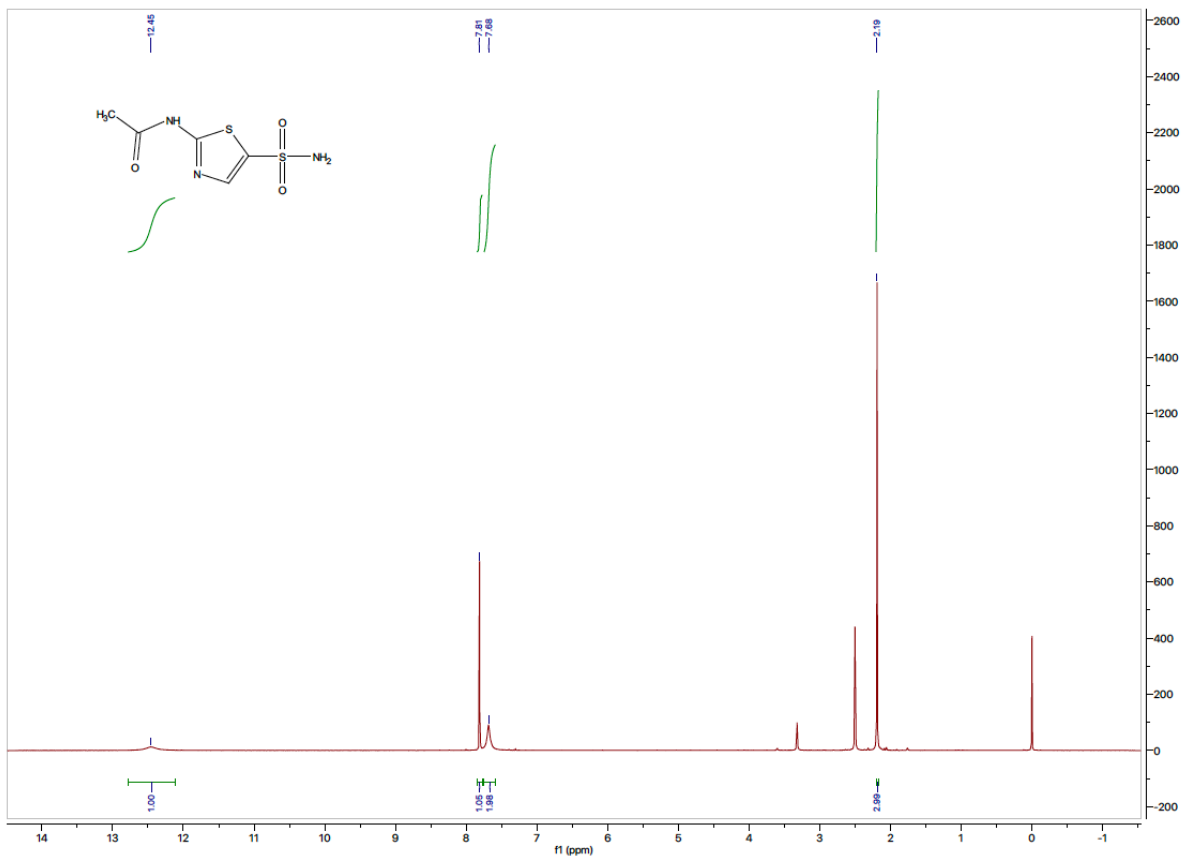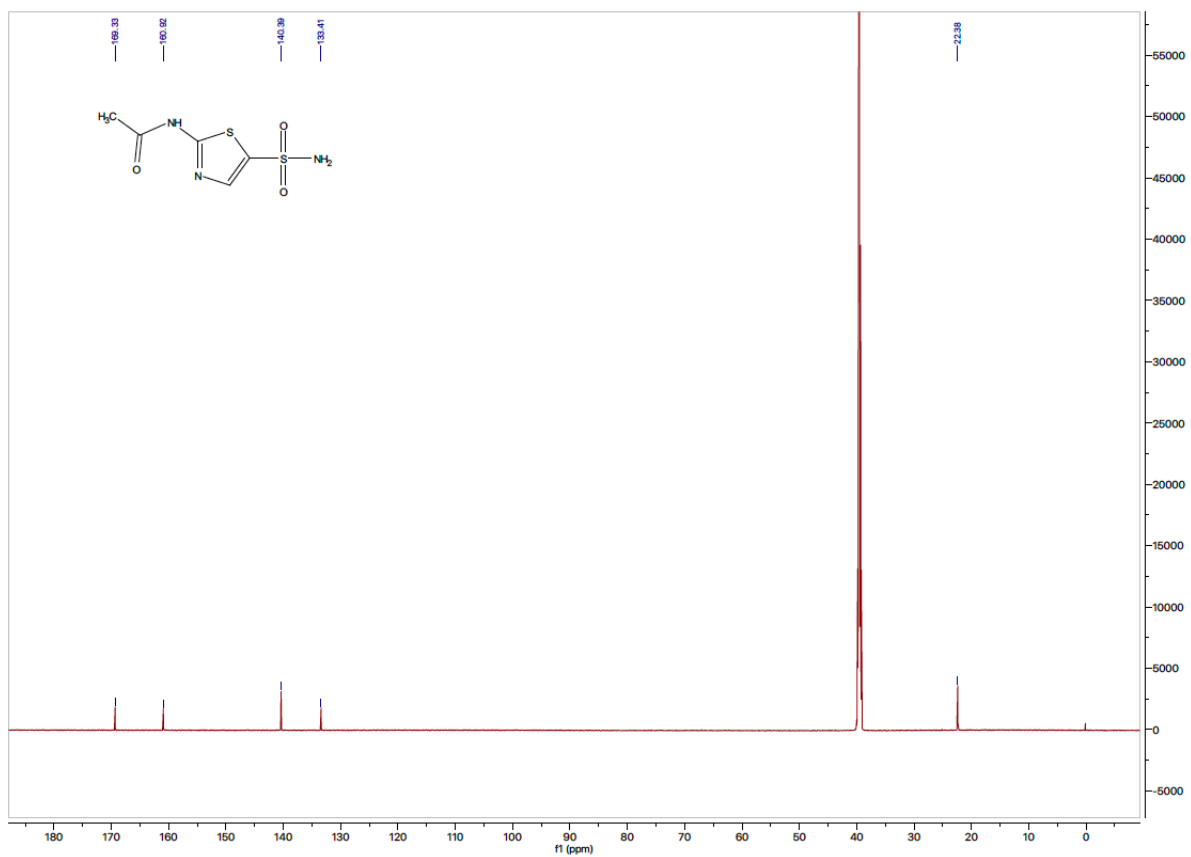

Compound 34  
Mass Spectrum  
MW = 221.0 g/mol

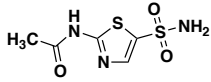

Spectrum RT 0.53 - 0.61 (6 scans) - Background Subtracted 0.32 - 0.47  
DF1-304\_Scan1\_is1 2018.11.19 14:40:24 ;  
APCI + Max: 1.3E9

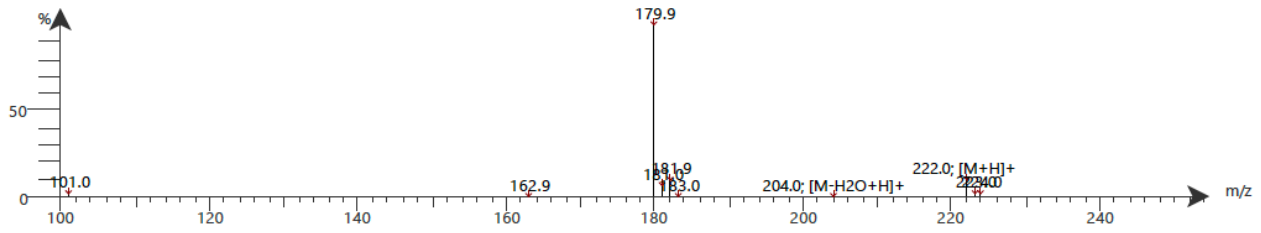

HPLC

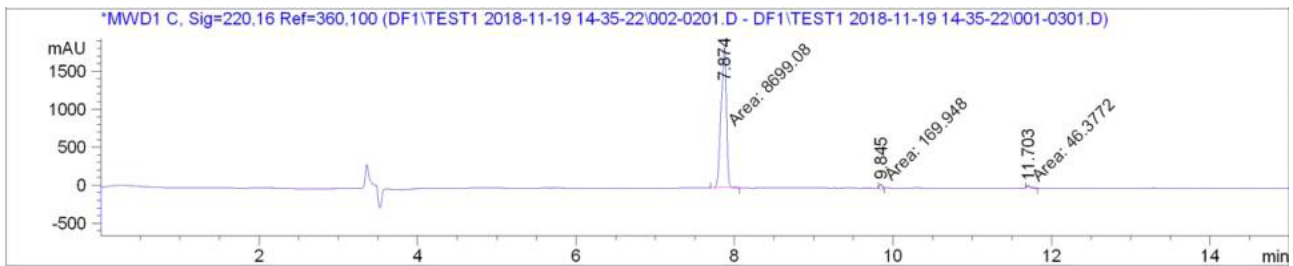

| Peak # | RetTime [min] | Type | Width [min] | Area [mAU*s] | Height [mAU] | Area %  |
|--------|---------------|------|-------------|--------------|--------------|---------|
| 1      | 7.874         | MM   | 0.0784      | 8699.08105   | 1849.76953   | 97.5736 |
| 2      | 9.845         | MM   | 0.0466      | 169.94794    | 60.78107     | 1.9062  |
| 3      | 11.703        | MM   | 0.0288      | 46.37718     | 26.85616     | 0.5202  |

Compound 35

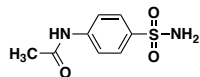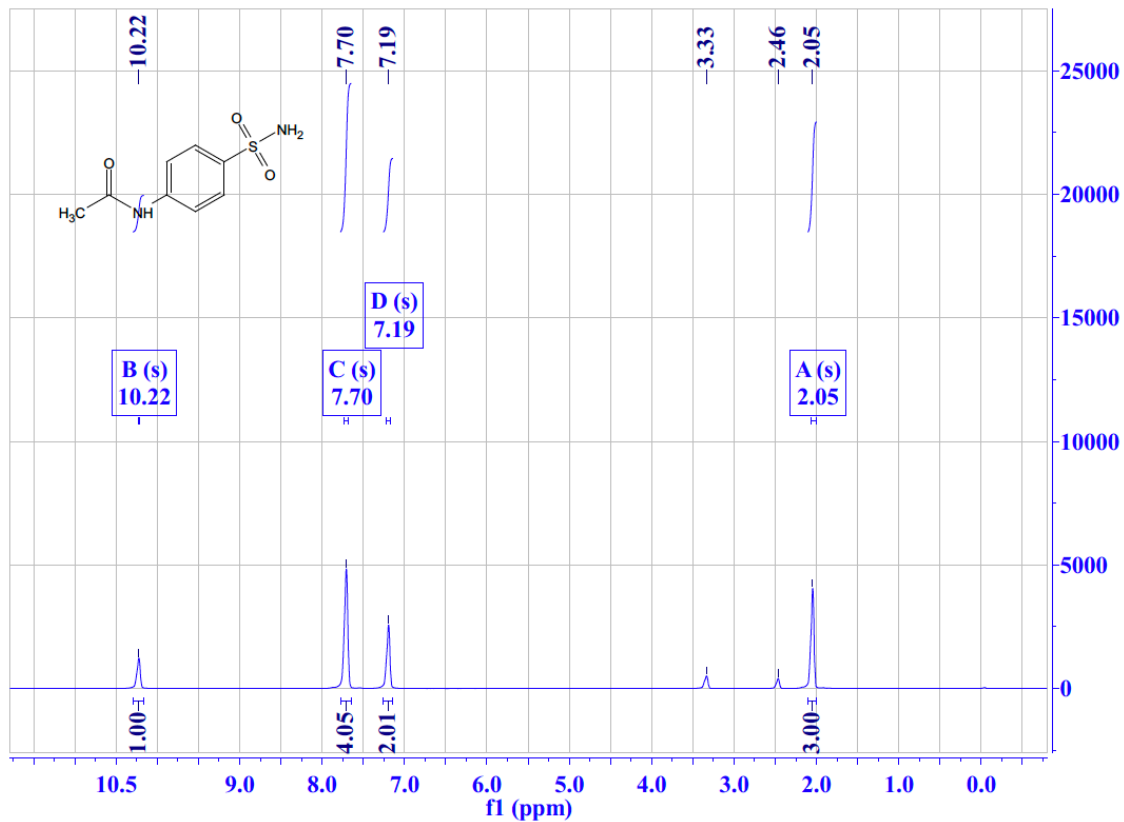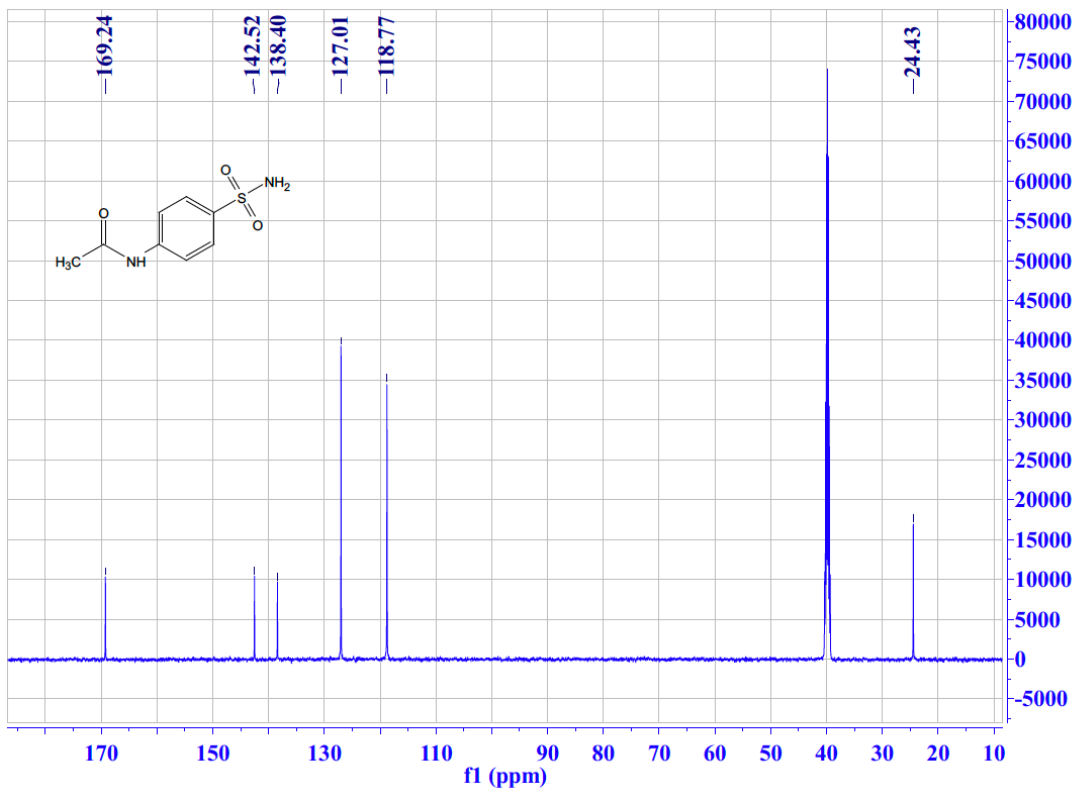

Compound 35  
 Mass Spectrum  
 MW = 214.0 g/mol

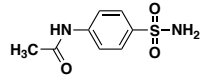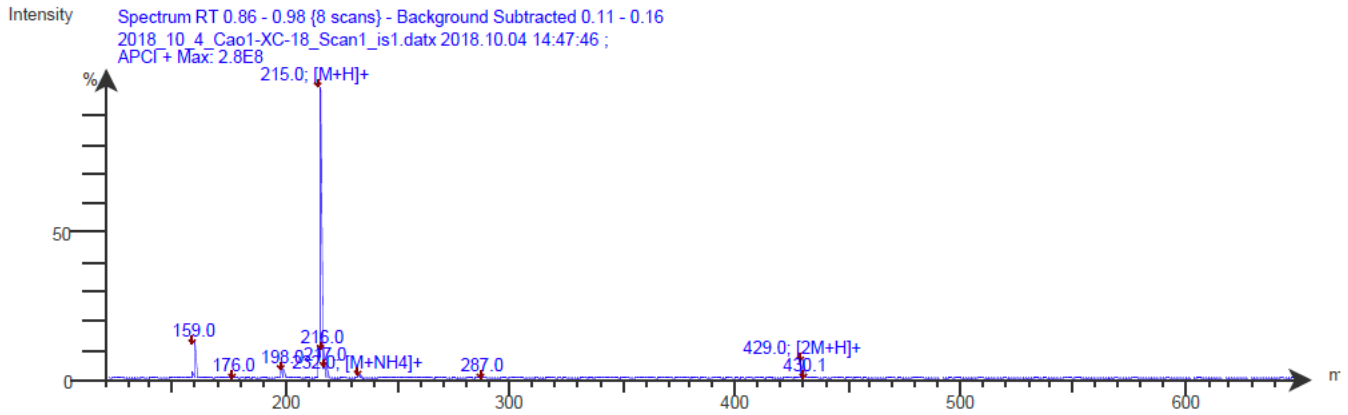

HPLC

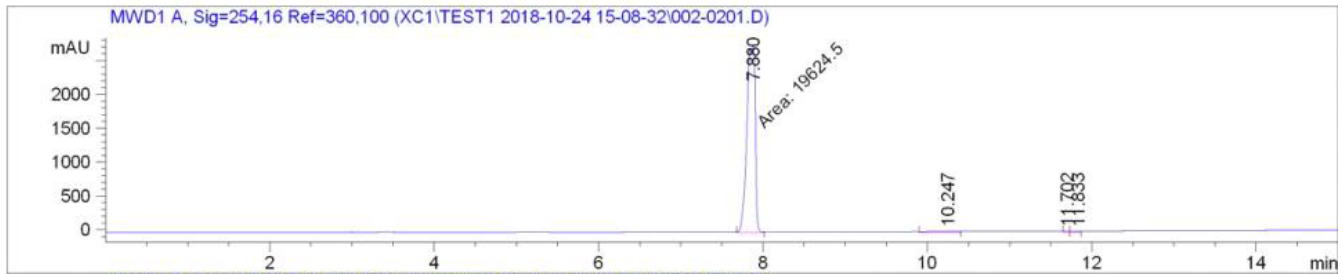

| Peak # | RetTime [min] | Type | Width [min] | Area [mAU*s] | Height [mAU] | Area %  |
|--------|---------------|------|-------------|--------------|--------------|---------|
| 1      | 7.880         | MM   | 0.1191      | 1.96245e4    | 2746.80664   | 97.4781 |
| 2      | 10.247        | VV   | 0.2512      | 316.44168    | 16.18145     | 1.5718  |
| 3      | 11.702        | VV   | 0.0682      | 70.67263     | 14.40988     | 0.3510  |
| 4      | 11.833        | VV   | 0.1053      | 120.59345    | 14.91707     | 0.5990  |
